# Supplementary material for: Design and synthesis of coordination polymers with Cu(ii) and heterocyclic N-oxides
Source: Royal Society of Chemistry journal article supplement (doi:10.1039/d2ce00139j), 2022-01-01
Supplement: d2ce00139j2.xlsx [file d2ce00139j2.xlsx]

## Sheet: Table S1
RefCode	Reference	Name	Ratio Cu:heterocyclic N-oxide	Number of ON-groups in heterocyclic N-oxide	Number of coordinated ON-groups of heterocyclic N-oxide	Coordination mode of ON-group	Coordination mode of in heterocyclic N-oxide through ON-groups	Number of ON-groups coordinated to Cu	Clusters formed by ON-group	Another functional groups	Contribution of another functional group to overal connectivity	Presence of another functional group	Coordination formula for coordination of ON-groups in heterocyclic N-oxide	Coordination formula for coordination of another functional group	Coordination formula for overal network	Periodicity of subnetwork {Cun(R(ON)m)}	Periodicity for overal network	Number of Cu atoms in molecular complex group {Cun(R(ON)m)}	Number of Cu atoms in molecular complex	Underlying net for subnetwork {Cun(R(ON)m)}	Underlying net for overal network
AJESIT	S.E.Tolstikov,N.A.Artiukhova,G.V.Romanenko,A.S.Bogomyakov,E.M.Zueva,I.Yu.Barskaya,M.V.Fedin,K.Yu.Maryunina,E.V.Tretyakov,R.Z.Sagdeev,V.I.Ovcharenko POLYHEDRON,2015,100,132	catena-[bis(\m-2-(4-methylpyridin-3-yl)-4,4,5,5-tetramethyl-4,5-dihydro-1H-imidazole-3-oxide-1-oxyl)-hexakis(1,1,1,5,5,5-hexafluoroacetylacetonato)-tri-copper].	3:2	2	2	κ1	B2	2, 1	none	pyridin, acetylacetonato	increases connectivity	heterocyclic N-oxide and co-ligand	A)3*B2)2	A)3*B01)6*M1)2	A)3*T3)2*B01)6	0D	1D	3	none	1,2,2M5-1	2,2,3C6
AJESIT01	S.E.Tolstikov,N.A.Artiukhova,G.V.Romanenko,A.S.Bogomyakov,E.M.Zueva,I.Yu.Barskaya,M.V.Fedin,K.Yu.Maryunina,E.V.Tretyakov,R.Z.Sagdeev,V.I.Ovcharenko POLYHEDRON,2015,100,132	catena-[bis(\m-2-(4-methylpyridin-3-yl)-4,4,5,5-tetramethyl-4,5-dihydro-1H-imidazole-3-oxide-1-oxyl)-hexakis(1,1,1,5,5,5-hexafluoroacetylacetonato)-tri-copper].	3:2	2	2	κ1	B2	2, 1	none	pyridin, acetylacetonato	increases connectivity	heterocyclic N-oxide and co-ligand	A)3*B2)2	A)3*B01)6*M1)2	A)3*T3)2*B01)6	0D	1D	3	none	1,2,2M5-1	2,2,3C6
AJESIT02	S.E.Tolstikov,N.A.Artiukhova,G.V.Romanenko,A.S.Bogomyakov,E.M.Zueva,I.Yu.Barskaya,M.V.Fedin,K.Yu.Maryunina,E.V.Tretyakov,R.Z.Sagdeev,V.I.Ovcharenko POLYHEDRON,2015,100,132	catena-[bis(\m-2-(4-methylpyridin-3-yl)-4,4,5,5-tetramethyl-4,5-dihydro-1H-imidazole-3-oxide-1-oxyl)-hexakis(1,1,1,5,5,5-hexafluoroacetylacetonato)-tri-copper].	3:2	2	2	κ1	B2	2, 1	none	pyridin, acetylacetonato	increases connectivity	heterocyclic N-oxide and co-ligand	A)3*B2)2	A)3*B01)6*M1)2	A)3*T3)2*B01)6	0D	1D	3	none	1,2,2M5-1	2,2,3C6
AJESIT03	S.E.Tolstikov,N.A.Artiukhova,G.V.Romanenko,A.S.Bogomyakov,E.M.Zueva,I.Yu.Barskaya,M.V.Fedin,K.Yu.Maryunina,E.V.Tretyakov,R.Z.Sagdeev,V.I.Ovcharenko POLYHEDRON,2015,100,132	catena-[bis(\m-2-(4-methylpyridin-3-yl)-4,4,5,5-tetramethyl-4,5-dihydro-1H-imidazole-3-oxide-1-oxyl)-hexakis(1,1,1,5,5,5-hexafluoroacetylacetonato)-tri-copper].	3:2	2	2	κ1	B2	2, 1	none	pyridin, acetylacetonato	increases connectivity	heterocyclic N-oxide and co-ligand	A)3*B2)2	A)3*B01)6*M1)2	A)3*T3)2*B01)6	0D	1D	3	none	1,2,2M5-1	2,2,3C6
AJEWET	S.E.Tolstikov,N.A.Artiukhova,G.V.Romanenko,A.S.Bogomyakov,E.M.Zueva,I.Yu.Barskaya,M.V.Fedin,K.Yu.Maryunina,E.V.Tretyakov,R.Z.Sagdeev,V.I.Ovcharenko POLYHEDRON,2015,100,132	(2-(4-methylpyridin-3-yl)-4,5-bis(spirocyclopentane)-4,5-dihydro-1-imidazole-3-oxide-1-oxyl)-bis(1,1,1,5,5,5-hexafluoroacetylacetonato)-coppern-hexadecane solvate.	1:1	2	1	κ1	M1	1	none	pyridin, acetylacetonato	increases connectivity	heterocyclic N-oxide and co-ligand	A*M1	A*B01)2*M1	A*B2*B01)2	0D	0D	1	2	1M2-1	1,2,4M8-3
AKENAI	C.P.Landee,E.Kirkman-Davis,M.I.J.Polson,M.M.Turnbull,J.L.Wikaira J.Coord.Chem.,2020,1	catena-[(\m-pyrazine)-diaqua-bis(pyridine N-oxide)-copper(ii) diperchlorate].	1:2	1	1	κ1	M1	2	none	pyrazine	increases connectivity	co-ligand	A*M1)2	A*B2*M1)2	A*B2*M1)4	0D	1D	1	none	1,2M3-1	2C1
AKENAI01	C.P.Landee,E.Kirkman-Davis,M.I.J.Polson,M.M.Turnbull,J.L.Wikaira J.Coord.Chem.,2020,1	catena-[(\m-pyrazine)-diaqua-bis(pyridine N-oxide)-copper(ii) diperchlorate].	1:2	1	1	κ1	M1	2	none	pyrazine	increases connectivity	co-ligand	A*M1)2	A*B2*M1)2	A*B2*M1)4	0D	1D	1	none	1,2M3-1	2C1
AMULAX	Min Cheng,You-Song Ding,Zhicheng Zhang,Qin-Xiang Jia INORG.CHIM.ACTA,2016,450,1	catena-[(\m-5-(1-oxo-1-pyridin-3-yl)-2H-tetrazol-2-yl)-(\m-azido)-copperhemihydrate].	1:1	1	1	κ1	M1	1	none	tetrazol, azido	increases connectivity	heterocyclic N-oxide and co-ligand	A*M1	A*B2*M2	A*T3*M2	0D	2D	1	none	1M2-1	gek1
APIHAJ	Ovcharenko V.I.,Fokin S.V.,Romanenko G.V.,Bogomyakov A.S.,Yachevsky D.S.,Chizhov D.L.,Charushin V.N.,Chupakhin O.N. IZV.AKAD.NAUK SSSR,SER.KHIM.(RUSS.)(RUSS.CHEM.BULL.),2010,1138	catena-(bis(\m~2~-1,1,1,7,7,7-hexafluorohepta-2,5-diene-2,6-diolato-4-one)-(\m~2~-2-(4-cyanophenyl)-4,4,5,5-tetramethyl-4,5-dihydro-1H-imidazole-3-oxide-1-oxyl)-di-copper(ii)).	1:1	2	2	κ1	B2	2	none	acetylacetonato, cyanophenyl	increases connectivity	heterocyclic N-oxide and co-ligand	A*B2	A)2*T02)2*M1	A)2*T3*T02)2	1D	2D	none	none	2C1	hcb
APIHEN	V.I.Ovcharenko,S.V.Fokin,G.V.Romanenko,A.S.Bogomyakov,D.S.Yachevsky,D.L.Chizhov,V.N.Charushin,O.N.Chupakhin IZV.AKAD.NAUK SSSR,SER.KHIM.(RUSS.)(RUSS.CHEM.BULL.),2010,1138	bis(\m~2~-1,1,1,7,7,7-hexafluorohepta-2,5-diene-2,6-diolato-4-one)-bis(2-(4-cyanophenyl)-4,4,5,5-tetramethyl-4,5-dihydro-1H-imidazole-3-oxide-1-oxyl)-bis(ethanol)-di-copper(ii).	1:1	2	1	κ1	M1	1	none	2,5-diene-2,6-diolato-4-one, ethanol	increases connectivity	co-ligand	A*M1	A*T02*M1	A*T02*M1)2	0D	0D	1	2	1M2-1	1,2,4M8-3
APIHIR	V.I.Ovcharenko,S.V.Fokin,G.V.Romanenko,A.S.Bogomyakov,D.S.Yachevsky,D.L.Chizhov,V.N.Charushin,O.N.Chupakhin IZV.AKAD.NAUK SSSR,SER.KHIM.(RUSS.)(RUSS.CHEM.BULL.),2010,1138	bis(\m~2~-1,1,1,7,7,7-hexafluorohepta-2,4-diene-2,4-diolato-6-one)-bis(2-(3-cyanophenyl)-4,4,5,5-tetramethyl-4,5-dihydro-1H-imidazole-3-oxide-1-oxyl)-di-copper(ii).	1:1	2	1	κ1	M1	1	none	2,5-diene-2,6-diolato-4-one	increases connectivity	co-ligand	A*M1	A*T02	A*T02*M1	0D	0D	1	2	1M2-1	1,2,3M6-1
APIHOX	Ovcharenko V.I.,Fokin S.V.,Romanenko G.V.,Bogomyakov A.S.,Yachevsky D.S.,Chizhov D.L.,Charushin V.N.,Chupakhin O.N. IZV.AKAD.NAUK SSSR,SER.KHIM.(RUSS.)(RUSS.CHEM.BULL.),2010,1138	catena-(bis(\m~2~-1,1,1,7,7,7-hexafluorohepta-2,5-diene-2,6-diolato-4-one)-(\m~2~-2-(3-cyanophenyl)-4,4,5,5-tetramethyl-4,5-dihydro-1H-imidazole-3-oxide-1-oxyl)-bis(ethanol)-di-copper(ii)).	2:1	2	2	κ1	B2	1	none	acetylacetonato	increases connectivity	co-ligand	A)2*B2	A*T02*M1	A)2*T02)2*B2*M1)2	0D	1D	2	none	1,2M3-1	2C1
APIHUD	V.I.Ovcharenko,S.V.Fokin,G.V.Romanenko,A.S.Bogomyakov,D.S.Yachevsky,D.L.Chizhov,V.N.Charushin,O.N.Chupakhin IZV.AKAD.NAUK SSSR,SER.KHIM.(RUSS.)(RUSS.CHEM.BULL.),2010,1138	bis(\m~2~-1,1,1,7,7,7-hexafluorohepta-2,5-diene-2,6-diolato-4-one)-bis(2-methyl-4,4,5,5-tetramethyl-4,5-dihydro-1H-imidazole-3-oxide-1-oxyl)-di-copper(ii).	1:1	2	1	κ1	M1	1	none	2,5-diene-2,6-diolato-4-one	increases connectivity	co-ligand	A*M1	A*T02	A*T02*M1	0D	0D	1	2	1M2-1	1,2,3M6-1
APIJAL	V.I.Ovcharenko,S.V.Fokin,G.V.Romanenko,A.S.Bogomyakov,D.S.Yachevsky,D.L.Chizhov,V.N.Charushin,O.N.Chupakhin IZV.AKAD.NAUK SSSR,SER.KHIM.(RUSS.)(RUSS.CHEM.BULL.),2010,1138	catena-(bis(\m~2~-1,1,1,7,7,7-hexafluorohepta-2,5-diene-2,6-diolato-4-one)-(\m~2~-2-methyl-4,4,5,5-tetramethyl-4,5-dihydro-1H-imidazole-3-oxide-1-oxyl)-di-copper(ii)).	2:1	2	2	κ1	B2	1	none	2,5-diene-2,6-diolato-4-one	increases connectivity	co-ligand	A)2*B2	A*T02	A)2*T02)2*B2	0D	1D	1	none	1,2M3-1	2,2,3C6
AQIXUT	C.Rajadurai,S.Ostrovsky,K.Falk,V.Enkelmann,W.Haase,M.Baumgarten INORG.CHIM.ACTA,2004,357,581	bis(\m~2~-2-(4,4,5,5-Tetramethyl-3-oxylimidazoline-1-oxide)-5-bromopyridine-N, O,O')-hexakis(hexafluoroacetylacetonato-O,O')-tri-copper(ii).	3:2	2	2	κ1	B2	2, 1	none	pyridin, acetylacetonato	increases connectivity	heterocyclic N-oxide and co-ligand	A)3*B2)2	A)3*B01)6*M1)2	A)3*T11)2*B01)6	0D	0D	3	3	1,2,2M5-1	1,1,2,3,4M11-1
AWIWIM	O.V.Koreneva,G.V.Romanenko,Yu.G.Shvedenkov,V.N.Ikorskii,V.I.Ovcharenko POLYHEDRON,2003,22,2487	catena-(bis(\m~3~-2-(4'-cyanophenyl)-4,4,5,5-tetramethyl-2-imidazoline-3-oxide-1-oxyl)-octakis(hexafluoroacetylacetonato)-tetra-copper(ii)).	2:1	2	2	κ1	B2	2	none	acetylacetonato, cyanophenyl	increases connectivity	heterocyclic N-oxide and co-ligand	A)2*B2	A)2*B01)4*M1	A)2*T3*B01)4	1D	1D	none	none	2C1	2C1
AWIXEJ	O.V.Koreneva,G.V.Romanenko,Yu.G.Shvedenkov,V.N.Ikorskii,V.I.Ovcharenko POLYHEDRON,2003,22,2487	catena-(bis(\m~2~-2-(4'-Cyanophenyl)-4,4,5,5-tetramethyl-2-imidazoline-3-oxide-1-oxyl)-tetrakis(hexafluoroacetylacetonato)-di-copper(ii)).	1:1	2	2	κ1	B2	2	none	acetylacetonato	terminal	co-ligand	A*B2	A*B01)2	A*B2*B01)2	1D	1D	none	none	2C1	2C1
AWIXEJ01	O.V.Koreneva,G.V.Romanenko,Yu.G.Shvedenkov,V.N.Ikorskii,V.I.Ovcharenko POLYHEDRON,2003,22,2487	catena-((\m~2~-2-(4'-Cyanophenyl)-4,4,5,5-tetramethyl-2-imidazoline-3-oxide-1-oxyl)-bis(hexafluoroacetylacetonato)-copper(ii)).	1:1	2	2	κ1	B2	2	none	acetylacetonato	terminal	co-ligand	A*B2	A*B01)2	A*B2*B01)2	1D	1D	none	none	2C1	2C1
AWOWAK	Qi-Hua Zhao,Li-Cun Li,Zong-Hui Jiang,Dai-Zheng Liao,Shi-Ping Yan,Rui-Bin Fang J.Chem.Cryst.,2004,34,191	catena-((\m~2~-Chloro)-(\m~2~-2-(4'-carboxyphenyl)-4,4,5,5-tetramethyl-4,5-dihydro-1H-imidazol-1-oxyl-3-oxide)-chloro-copper(ii)). catena-((mu!2$-Chloro)-(mu!2$-2-(4'-carboxyphenyl)-4,4,5,5-tetramethylnitronylnitroxide)-chloro-copper(ii)).	1:1	2	1	κ1	M1	1	none	chloro, carboxylate	increases connectivity	heterocyclic N-oxide and co-ligand	A*M1	A*M2*M1)2	A*B2*M2*M1	0D	1D	1	none	1M2-1	2,4C4
AZPOCU10	N.R.Stemple,W.H.Watson CRYST.STRUCT.COMMUN.,1975,4,25	catena((\m~4~-4,4'-AzopyridineN,N'-dioxide-O,O,O',O')-bis(dichloro-(4,4'-azopyridineN,N'-dioxide-O)-copper(ii))).	2:3	2	2, 1	κ2, κ1	B4, M1	3	4-c N4O4Cu2	chloro	terminal	co-ligand	A)2*B4*M1)2	A*M1)2	A)2*B4*M1)6	1D	1D	none	none	1,3,4-c net new1 (2,4C4)	2,4C4
BACHIW	J.S.Wood,R.O.Day,C.P.Keijzers,E.de Boer,A.E.Yildirim,A.A.K.Klaassen INORG.CHEM.,1981,20,1982	hexakis(4-Picoline-N-oxide)-copper(ii) diperchlorate.	1:6	1	1	κ1	M1	6	none	none	none	none	A*M1)6	none	A*M1)6	0D	0D	1	1	1,6M7-1	1,6M7-1
BAMLIL	D.Visinescu,G.I.Pascu,M.Andruh,J.Magull,H.W.Roesky INORG.CHIM.ACTA,2002,340,201	(\m~2~-4,4'-Bipyridine-N,N'-dioxido)-bis(\m~2~-hydroxo)-bis(\m~2~-2,6-bis((2-(2-pyridyl)ethyl)iminomethyl)-4-methylphenolato)-tetra-copper(ii)tetraperchlorate hydrate.	4:1	2	2	κ1	B2	1	none	pyridin, hydroxo, phenol, imine	increases connectivity	co-ligand	A)4*B2	A)2*P002*B2*M2	A)4*P002)2*B2)3*M2)2	0D	0D	1	4	1,2M3-1	2,2,3,4M11-2
BASLOW	M.H.Dickman,R.J.Doedens INORG.CHEM.,1981,20,2677	bis(Hexafluoroacetylacetonato)-(2,2,6,6-tetramethylpiperidinyl-1-oxy)-copper(ii).	1:1	1	1	κ1	M1	1	none	acetylacetonato	terminal	co-ligand	A*M1	A*B01)2	A*B01)2*M1	0D	0D	1	1	1M2-1	1,3M4-1
BEJCID	Xiu-Ling Li,Jiu-Tong Chen,De-Zhong Niu,Ju-Ting Sheng,Da-Peng Zhang Jiegou Huaxue(Chin.)(Chin.J.Struct.Chem.),2003,22,415	catena-(bis(\m~2~-Isonicotinato N-oxide-O,O')-aqua-copper(ii)).	1:2	1	1	κ1	M1	2	none	carboxylate	increases connectivity	heterocyclic N-oxide and co-ligand	A*M1)2	A*M1)3	A*B2)2*M1	0D	1D	1	none	1,2M3-1	2,4C4
BEMSAO	S.Fokin,V.Ovcharenko,G.Romanenko,V.Ikorskii INORG.CHEM.,2004,43,969	catena-(bis(\m~2~-2-(1-Methylpyrazol-4-yl)-4,4,5,5-tetramethylimidazoline-3-oxide-1-oxyl-N',O)-tetrakis(hexafluoroacetylacetonato-O,O')-di-copper(ii)).	1:1	2	1	κ1	M1	2	none	pyrazol, acetylacetonato	increases connectivity	heterocyclic N-oxide and co-ligand	A*M1	A*B01)2*M1	A*B2*B01)2	0D	1D	1	none	1,2M3-1	2C1
BEMSAO01	S.Fokin,V.Ovcharenko,G.Romanenko,V.Ikorskii INORG.CHEM.,2004,43,969	catena-(bis(\m~2~-2-(1-Methylpyrazol-4-yl)-4,4,5,5-tetramethylimidazoline-3-oxide-1-oxyl-N',O)-tetrakis(hexafluoroacetylacetonato-O,O')-di-copper(ii)).	1:1	2	1	κ1	M1	2	none	pyrazol, acetylacetonato	increases connectivity	heterocyclic N-oxide and co-ligand	A*M1	A*B01)2*M1	A*B2*B01)2	0D	1D	1	none	1,2M3-1	2C1
BEMSAO02	S.Fokin,V.Ovcharenko,G.Romanenko,V.Ikorskii INORG.CHEM.,2004,43,969	catena-(bis(\m~2~-2-(1-Methylpyrazol-4-yl)-4,4,5,5-tetramethylimidazoline-3-oxide-1-oxyl-N',O)-tetrakis(hexafluoroacetylacetonato-O,O')-di-copper(ii)).	1:1	2	1	κ1	M1	2	none	pyrazol, acetylacetonato	increases connectivity	heterocyclic N-oxide and co-ligand	A*M1	A*B01)2*M1	A*B2*B01)2	0D	1D	1	none	1,2M3-1	2C1
BEMSAO03	S.Fokin,V.Ovcharenko,G.Romanenko,V.Ikorskii INORG.CHEM.,2004,43,969	catena-(bis(\m~2~-2-(1-Methylpyrazol-4-yl)-4,4,5,5-tetramethylimidazoline-3-oxide-1-oxyl-N',O)-tetrakis(hexafluoroacetylacetonato-O,O')-di-copper(ii)).	1:1	2	1	κ1	M1	2	none	pyrazol, acetylacetonato	increases connectivity	heterocyclic N-oxide and co-ligand	A*M1	A*B01)2*M1	A*B2*B01)2	0D	1D	1	none	1,2M3-1	2C1
BEMSAO04	S.Fokin,V.Ovcharenko,G.Romanenko,V.Ikorskii INORG.CHEM.,2004,43,969	catena-(bis(\m~2~-2-(1-Methylpyrazol-4-yl)-4,4,5,5-tetramethylimidazoline-3-oxide-1-oxyl-N',O)-tetrakis(hexafluoroacetylacetonato-O,O')-di-copper(ii)).	1:1	2	1	κ1	M1	2	none	pyrazol, acetylacetonato	increases connectivity	heterocyclic N-oxide and co-ligand	A*M1	A*B01)2*M1	A*B2*B01)2	0D	1D	1	none	1,2M3-1	2C1
BEMSAO05	V.Ovcharenko,G.Romanenko,A.Polushkin,G.Letyagin,A.Bogomyakov,M.Fedin,K.Maryunina,S.Nishihara,K.Inoue,M.Petrova,V.Morozov,E.Zueva INORG.CHEM.,2019,58,9187	catena-[bis(\m-[4,4,5,5-tetramethyl-2-(1-methyl-1H-pyrazol-4-yl)-3-oxo-4,5-dihydro-1H-imidazol-1-yl]oxidanylradical)-tetrakis(1,1,1,5,5,5-hexafluoroacetylacetonato)-di-copper(ii)].	1:1	2	1	κ1	M1	2	none	pyrazol, acetylacetonato	increases connectivity	heterocyclic N-oxide and co-ligand	A*M1	A*B01)2*M1	A*B2*B01)2	0D	1D	1	none	1,2M3-1	2C1
BEMSAO06	V.Ovcharenko,G.Romanenko,A.Polushkin,G.Letyagin,A.Bogomyakov,M.Fedin,K.Maryunina,S.Nishihara,K.Inoue,M.Petrova,V.Morozov,E.Zueva INORG.CHEM.,2019,58,9187	catena-[bis(\m-[4,4,5,5-tetramethyl-2-(1-methyl-1H-pyrazol-4-yl)-3-oxo-4,5-dihydro-1H-imidazol-1-yl]oxidanylradical)-tetrakis(1,1,1,5,5,5-hexafluoroacetylacetonato)-di-copper(ii)].	1:1	2	1	κ1	M1	2	none	pyrazol, acetylacetonato	increases connectivity	heterocyclic N-oxide and co-ligand	A*M1	A*B01)2*M1	A*B2*B01)2	0D	1D	1	none	1,2M3-1	2C1
BEMSAO07	V.Ovcharenko,G.Romanenko,A.Polushkin,G.Letyagin,A.Bogomyakov,M.Fedin,K.Maryunina,S.Nishihara,K.Inoue,M.Petrova,V.Morozov,E.Zueva INORG.CHEM.,2019,58,9187	catena-[bis(\m-[4,4,5,5-tetramethyl-2-(1-methyl-1H-pyrazol-4-yl)-3-oxo-4,5-dihydro-1H-imidazol-1-yl]oxidanylradical)-tetrakis(1,1,1,5,5,5-hexafluoroacetylacetonato)-di-copper(ii)].	1:1	2	1	κ1	M1	2	none	pyrazol, acetylacetonato	increases connectivity	heterocyclic N-oxide and co-ligand	A*M1	A*B01)2*M1	A*B2*B01)2	0D	1D	1	none	1,2M3-1	2C1
BEMSAO08	V.Ovcharenko,G.Romanenko,A.Polushkin,G.Letyagin,A.Bogomyakov,M.Fedin,K.Maryunina,S.Nishihara,K.Inoue,M.Petrova,V.Morozov,E.Zueva INORG.CHEM.,2019,58,9187	catena-[bis(\m-[4,4,5,5-tetramethyl-2-(1-methyl-1H-pyrazol-4-yl)-3-oxo-4,5-dihydro-1H-imidazol-1-yl]oxidanylradical)-tetrakis(1,1,1,5,5,5-hexafluoroacetylacetonato)-di-copper(ii)].	1:1	2	1	κ1	M1	2	none	pyrazol, acetylacetonato	increases connectivity	heterocyclic N-oxide and co-ligand	A*M1	A*B01)2*M1	A*B2*B01)2	0D	1D	1	none	1,2M3-1	2C1
BEMSAO09	V.Ovcharenko,G.Romanenko,A.Polushkin,G.Letyagin,A.Bogomyakov,M.Fedin,K.Maryunina,S.Nishihara,K.Inoue,M.Petrova,V.Morozov,E.Zueva INORG.CHEM.,2019,58,9187	catena-[bis(\m-[4,4,5,5-tetramethyl-2-(1-methyl-1H-pyrazol-4-yl)-3-oxo-4,5-dihydro-1H-imidazol-1-yl]oxidanylradical)-tetrakis(1,1,1,5,5,5-hexafluoroacetylacetonato)-di-copper(ii)].	1:1	2	1	κ1	M1	2	none	pyrazol, acetylacetonato	increases connectivity	heterocyclic N-oxide and co-ligand	A*M1	A*B01)2*M1	A*B2*B01)2	0D	1D	1	none	1,2M3-1	2C1
BEMSAO10	V.Ovcharenko,G.Romanenko,A.Polushkin,G.Letyagin,A.Bogomyakov,M.Fedin,K.Maryunina,S.Nishihara,K.Inoue,M.Petrova,V.Morozov,E.Zueva INORG.CHEM.,2019,58,9187	catena-[bis(\m-[4,4,5,5-tetramethyl-2-(1-methyl-1H-pyrazol-4-yl)-3-oxo-4,5-dihydro-1H-imidazol-1-yl]oxidanylradical)-tetrakis(1,1,1,5,5,5-hexafluoroacetylacetonato)-di-copper(ii)].	1:1	2	1	κ1	M1	2	none	pyrazol, acetylacetonato	increases connectivity	heterocyclic N-oxide and co-ligand	A*M1	A*B01)2*M1	A*B2*B01)2	0D	1D	1	none	1,2M3-1	2C1
BEMSAO11	V.Ovcharenko,G.Romanenko,A.Polushkin,G.Letyagin,A.Bogomyakov,M.Fedin,K.Maryunina,S.Nishihara,K.Inoue,M.Petrova,V.Morozov,E.Zueva INORG.CHEM.,2019,58,9187	catena-[bis(\m-[4,4,5,5-tetramethyl-2-(1-methyl-1H-pyrazol-4-yl)-3-oxo-4,5-dihydro-1H-imidazol-1-yl]oxidanylradical)-tetrakis(1,1,1,5,5,5-hexafluoroacetylacetonato)-di-copper(ii)].	1:1	2	1	κ1	M1	2	none	pyrazol, acetylacetonato	increases connectivity	heterocyclic N-oxide and co-ligand	A*M1	A*B01)2*M1	A*B2*B01)2	0D	1D	1	none	1,2M3-1	2C1
BEMSAO12	V.Ovcharenko,G.Romanenko,A.Polushkin,G.Letyagin,A.Bogomyakov,M.Fedin,K.Maryunina,S.Nishihara,K.Inoue,M.Petrova,V.Morozov,E.Zueva INORG.CHEM.,2019,58,9187	catena-[bis(\m-[4,4,5,5-tetramethyl-2-(1-methyl-1H-pyrazol-4-yl)-3-oxo-4,5-dihydro-1H-imidazol-1-yl]oxidanylradical)-tetrakis(1,1,1,5,5,5-hexafluoroacetylacetonato)-di-copper(ii)].	1:1	2	1	κ1	M1	2	none	pyrazol, acetylacetonato	increases connectivity	heterocyclic N-oxide and co-ligand	A*M1	A*B01)2*M1	A*B2*B01)2	0D	1D	1	none	1,2M3-1	2C1
BEMSAO13	V.Ovcharenko,G.Romanenko,A.Polushkin,G.Letyagin,A.Bogomyakov,M.Fedin,K.Maryunina,S.Nishihara,K.Inoue,M.Petrova,V.Morozov,E.Zueva INORG.CHEM.,2019,58,9187	catena-[bis(\m-[4,4,5,5-tetramethyl-2-(1-methyl-1H-pyrazol-4-yl)-3-oxo-4,5-dihydro-1H-imidazol-1-yl]oxidanylradical)-tetrakis(1,1,1,5,5,5-hexafluoroacetylacetonato)-di-copper(ii)].	1:1	2	1	κ1	M1	2	none	pyrazol, acetylacetonato	increases connectivity	heterocyclic N-oxide and co-ligand	A*M1	A*B01)2*M1	A*B2*B01)2	0D	1D	1	none	1,2M3-1	2C1
BEMSAO14	V.Ovcharenko,G.Romanenko,A.Polushkin,G.Letyagin,A.Bogomyakov,M.Fedin,K.Maryunina,S.Nishihara,K.Inoue,M.Petrova,V.Morozov,E.Zueva INORG.CHEM.,2019,58,9187	catena-[bis(\m-[4,4,5,5-tetramethyl-2-(1-methyl-1H-pyrazol-4-yl)-3-oxo-4,5-dihydro-1H-imidazol-1-yl]oxidanylradical)-tetrakis(1,1,1,5,5,5-hexafluoroacetylacetonato)-di-copper(ii)].	1:1	2	1	κ1	M1	2	none	pyrazol, acetylacetonato	increases connectivity	heterocyclic N-oxide and co-ligand	A*M1	A*B01)2*M1	A*B2*B01)2	0D	1D	1	none	1,2M3-1	2C1
BEMSAO15	V.Ovcharenko,G.Romanenko,A.Polushkin,G.Letyagin,A.Bogomyakov,M.Fedin,K.Maryunina,S.Nishihara,K.Inoue,M.Petrova,V.Morozov,E.Zueva INORG.CHEM.,2019,58,9187	catena-[bis(\m-[4,4,5,5-tetramethyl-2-(1-methyl-1H-pyrazol-4-yl)-3-oxo-4,5-dihydro-1H-imidazol-1-yl]oxidanylradical)-tetrakis(1,1,1,5,5,5-hexafluoroacetylacetonato)-di-copper(ii)].	1:1	2	1	κ1	M1	2	none	pyrazol, acetylacetonato	increases connectivity	heterocyclic N-oxide and co-ligand	A*M1	A*B01)2*M1	A*B2*B01)2	0D	1D	1	none	1,2M3-1	2C1
BEMSAO16	V.Ovcharenko,G.Romanenko,A.Polushkin,G.Letyagin,A.Bogomyakov,M.Fedin,K.Maryunina,S.Nishihara,K.Inoue,M.Petrova,V.Morozov,E.Zueva INORG.CHEM.,2019,58,9187	catena-[bis(\m-[4,4,5,5-tetramethyl-2-(1-methyl-1H-pyrazol-4-yl)-3-oxo-4,5-dihydro-1H-imidazol-1-yl]oxidanylradical)-tetrakis(1,1,1,5,5,5-hexafluoroacetylacetonato)-di-copper(ii)].	1:1	2	1	κ1	M1	2	none	pyrazol, acetylacetonato	increases connectivity	heterocyclic N-oxide and co-ligand	A*M1	A*B01)2*M1	A*B2*B01)2	0D	1D	1	none	1,2M3-1	2C1
BEMSAO17	V.Ovcharenko,G.Romanenko,A.Polushkin,G.Letyagin,A.Bogomyakov,M.Fedin,K.Maryunina,S.Nishihara,K.Inoue,M.Petrova,V.Morozov,E.Zueva INORG.CHEM.,2019,58,9187	catena-[bis(\m-[4,4,5,5-tetramethyl-2-(1-methyl-1H-pyrazol-4-yl)-3-oxo-4,5-dihydro-1H-imidazol-1-yl]oxidanylradical)-tetrakis(1,1,1,5,5,5-hexafluoroacetylacetonato)-di-copper(ii)].	1:1	2	1	κ1	M1	2	none	pyrazol, acetylacetonato	increases connectivity	heterocyclic N-oxide and co-ligand	A*M1	A*B01)2*M1	A*B2*B01)2	0D	1D	1	none	1,2M3-1	2C1
BEMSAO18	V.Ovcharenko,G.Romanenko,A.Polushkin,G.Letyagin,A.Bogomyakov,M.Fedin,K.Maryunina,S.Nishihara,K.Inoue,M.Petrova,V.Morozov,E.Zueva INORG.CHEM.,2019,58,9187	catena-[bis(\m-[4,4,5,5-tetramethyl-2-(1-methyl-1H-pyrazol-4-yl)-3-oxo-4,5-dihydro-1H-imidazol-1-yl]oxidanylradical)-tetrakis(1,1,1,5,5,5-hexafluoroacetylacetonato)-di-copper(ii)].	1:1	2	1	κ1	M1	2	none	pyrazol, acetylacetonato	increases connectivity	heterocyclic N-oxide and co-ligand	A*M1	A*B01)2*M1	A*B2*B01)2	0D	1D	1	none	1,2M3-1	2C1
BEMSAO19	V.Ovcharenko,G.Romanenko,A.Polushkin,G.Letyagin,A.Bogomyakov,M.Fedin,K.Maryunina,S.Nishihara,K.Inoue,M.Petrova,V.Morozov,E.Zueva INORG.CHEM.,2019,58,9187	catena-[bis(\m-[4,4,5,5-tetramethyl-2-(1-methyl-1H-pyrazol-4-yl)-3-oxo-4,5-dihydro-1H-imidazol-1-yl]oxidanylradical)-tetrakis(1,1,1,5,5,5-hexafluoroacetylacetonato)-di-copper(ii)].	1:1	2	1	κ1	M1	2	none	pyrazol, acetylacetonato	increases connectivity	heterocyclic N-oxide and co-ligand	A*M1	A*B01)2*M1	A*B2*B01)2	0D	1D	1	none	1,2M3-1	2C1
BEMTOD	S.Fokin,V.Ovcharenko,G.Romanenko,V.Ikorskii INORG.CHEM.,2004,43,969	bis(\m~2~-2-(1-Methylpyrazol-4-yl)-4,4,5,5-tetramethylimidazoline-3-oxide-1-oxyl-N',O)-hexakis(hexafluoroacetylacetonato-O,O')-tri-copper(ii) benzenesolvate.	3:2	2	1	κ1	M1	1	none	pyrazol, acetylacetonato	increases connectivity	heterocyclic N-oxide and co-ligand	A)3*M1)2	A)3*B01)6*M1)2	A)3*B2)2*B01)6	0D	0D	1	3	1M2-1	1,1,2,3,4M11-1
BEMTUJ	S.Fokin,V.Ovcharenko,G.Romanenko,V.Ikorskii INORG.CHEM.,2004,43,969	bis(\m~2~-2-(1-Methylpyrazol-4-yl)-4,4,5,5-tetramethylimidazoline-3-oxide-1-oxyl-N',O)-hexakis(hexafluoroacetylacetonato-O,O')-tri-copper(ii) toluenesolvate.	3:2	2	1	κ1	M1	1	none	pyrazol, acetylacetonato	increases connectivity	heterocyclic N-oxide and co-ligand	A)3*M1)2	A)3*B01)6*M1)2	A)3*B2)2*B01)6	0D	0D	1	3	1M2-1	1,1,2,3,4M11-1
BEMVAR	S.Fokin,V.Ovcharenko,G.Romanenko,V.Ikorskii INORG.CHEM.,2004,43,969	bis(\m~2~-2-(1-Methylpyrazol-4-yl)-4,4,5,5-tetramethylimidazoline-3-oxide-1-oxyl-N',O)-hexakis(hexafluoroacetylacetonato-O,O')-tri-copper(ii) n-hexanesolvate.	3:2	2	1	κ1	M1	1	none	pyrazol, acetylacetonato	increases connectivity	heterocyclic N-oxide and co-ligand	A)3*M1)2	A)3*B01)6*M1)2	A)3*B2)2*B01)6	0D	0D	1	3	1M2-1	1,1,2,3,4M11-1
BEMVEV	S.Fokin,V.Ovcharenko,G.Romanenko,V.Ikorskii INORG.CHEM.,2004,43,969	bis(\m~2~-2-(1-Methylpyrazol-4-yl)-4,4,5,5-tetramethylimidazoline-3-oxide-1-oxyl-N',O)-hexakis(hexafluoroacetylacetonato-O,O')-tri-copper(ii) n-heptanesolvate.	3:2	2	1	κ1	M1	1	none	pyrazol, acetylacetonato	increases connectivity	heterocyclic N-oxide and co-ligand	A)3*M1)2	A)3*B01)6*M1)2	A)3*B2)2*B01)6	0D	0D	1	3	1M2-1	1,1,2,3,4M11-1
BEMVIZ	S.Fokin,V.Ovcharenko,G.Romanenko,V.Ikorskii INORG.CHEM.,2004,43,969	(\m~2~-2-(1-Methylpyrazol-4-yl)-4,4,5,5-tetramethylimidazoline-3-oxide-1-oxyl-N',O)-tetrakis(hexafluoroacetylacetonato-O,O')-di-copper(ii) n-hexane solvate.	2:1	2	1	κ1	M1	1	none	pyrazol, acetylacetonato	increases connectivity	heterocyclic N-oxide and co-ligand	A)2*M1	A)2*B01)4*M1	A)2*B2*B01)4	0D	0D	1	2	1M2-1	1,2,3M7-2
BEPNUF	S.F.Pavkovic,S.L.Wille ACTA CRYSTALLOGR.,SECT.B:STRUCT.CRYSTALLOGR.CRYST.CHEM.,1982,38,1605	bis(\m~2~-(2-Methylaminopyridine-1-oxide-O))-bis(dichloro-(2-methylaminopyridine-1-oxide-O)-copper(ii)).	1:2	1	1	κ2, κ1	M2, M1	3	4-c N4O4Cu2	chloro	terminal	co-ligand	A*M2*M1	A*M1)2	A*M2*M1)3	0D	0D	2	2	1,2,3M6-1	1,2,5M10-1
BEYTEG	Jing Xiang,Ya Luo,Chun-Hong Wang Z.ANORG.ALLG.CHEM.,2013,639,563	catena-[(\m~4~-5-(1-oxidopyridin-4-yl)-tetrazolato)-copper].	1:1	1	1	κ1	M1	1	none	tetrazol	increases connectivity	heterocyclic N-oxide	A*M1	A*T3	A*K4	0D	3D	1	none	1M2-1	hxg-d-4-C2/m
BIKDIJ	Hao-Ling Sun,Song Gao,Bao-Qing Ma,S.R.Batten CRYSTENGCOMM,2004,6,579	catena-(bis(\m~2~-Cyanamide)-(\m~2~-1,2-bis(4-pyridyl)ethaneN,N'-dioxide)-copper(ii)).	1:1	2	2	κ1	B2	2	none	Cyanamide	increases connectivity	co-ligand	A*B2	A*B2)2	A*B2)3	1D	3D	none	none	2C1	mab
BIYGAS	S.C.Manna,E.Zangrando,N.R.Chaudhuri J.MOL.STRUCT.,2008,877,145	(\m~2~-4,4'-Bipyridinium-N,N'-dioxide)-diaqua-bis(pyridine-2,6-dicarboxylate-N,O,O')-di-copper(ii).	2:1	2	2	κ1	B2	1	none	pyridin, carboxylate	increases connectivity	co-ligand	A)2*B2	A*T001*M1	A)2*T001)2*B2*M1)2	0D	0D	1	2	1,2M3-1	1,2,3M7-2
BOTBUH11	C.P.Keijzers,R.K.McMullan,J.S.Wood,G.van Kalkeren,R.Srinivasan,E.de Boer INORG.CHEM.,1982,21,4275	hexakis(Pyridine-N-oxide-O)-copper(ii) diperchlorate dimethylformamide solvate.	1:6	1	1	κ1	M1	6	none	none	none	none	A*M1)6	none	A*M1)6	0D	0D	1	1	1,6M7-1	1,6M7-1
BUSJII	H.Knuuttila INORG.CHIM.ACTA,1983,69,173	catena-(bis(\m~2~-Nicotinato N-oxide)-diaqua-copper(ii)) tetrahydrate.	1:2	1	1	κ1	M1	2	none	carboxylate, water	increases connectivity	heterocyclic N-oxide and co-ligand	A*M1)2	A*M1)4	A*B2)2*M1)2	0D	1D	1	none	1,2M3-1	2,4C4
BUSJII01	D.A.Clemente INORG.CHIM.ACTA,2005,358,1725	catena-(bis(\m~2~-nicotinato N-oxide)-diaqua-copper(ii) tetrahydrate).	1:2	1	1	κ1	M1	2	none	carboxylate, water	increases connectivity	heterocyclic N-oxide and co-ligand	A*M1)2	A*M1)4	A*B2)2*M1)2	0D	1D	1	none	1,2M3-1	2,4C4
BUSJII02	J.B.Baruah CSD Communication(Private Communication),2016,	catena-[bis(\m-1-oxo-1-pyridine-3-carboxylato)-diaqua-copper(ii) tetrahydrate].	1:2	1	1	κ1	M1	2	none	carboxylate, water	increases connectivity	heterocyclic N-oxide and co-ligand	A*M1)2	A*M1)4	A*B2)2*M1)2	0D	1D	1	none	1,2M3-1	2,4C4
CAJYIV	L.C.Porter,M.H.Dickman,R.J.Doedens INORG.CHEM.,1983,22,1962	bis(2,2,6,6-Tetramethylpiperidinyl-1-oxy)-tetrakis(\m~2~-trichloroacetato-O,O')-di-copper(ii).	1:1	1	1	κ1	M1	1	none	carboxylate	increases connectivity	co-ligand	A*M1	A*B2)2	A*B2)2*M1	0D	0D	1	2	1M2-1	1,2,5M8-2
CAJYIV10	L.C.Porter,M.H.Dickman,R.J.Doedens INORG.CHEM.,1986,25,678	tetrakis(\m~2~-Trichloroacetato-O,O')-bis(2,2,6,6-tetramethyl-piperidinyl-1-oxy)-di-copper(ii).	1:1	1	1	κ1	M1	1	none	carboxylate	increases connectivity	co-ligand	A*M1	A*B2)2	A*B2)2*M1	0D	0D	1	2	1M2-1	1,2,5M8-2
CAPYOC	E.D.Estes,D.J.Hodgson INORG.CHEM.,1976,15,348	bis(Dichloro-aqua-(\m~2~-pyridine N-oxide)-copper(ii)).	1:1	1	1	κ2	M2	2	2-c N2O2Cu2	water, chloro	terminal	co-ligand	A*M2	A*M1)3	A*M2*M1)3	0D	0D	2	2	2M4-1	1,2,5M10-1
CAPYOC01	J.A.Paulson,D.A.Krost,G.L.McPherson,R.D.Rogers,J.L.Atwood INORG.CHEM.,1980,19,2519	bis(Dichloro-aqua-(\m~2~-pyridine-N-oxide)-copper(ii)).	1:1	1	1	κ2	M2	2	2-c N2O2Cu2	water, chloro	terminal	co-ligand	A*M2	A*M1)3	A*M2*M1)3	0D	0D	2	2	2M4-1	1,2,5M10-1
CAPYOC02	M.Gawron,R.C.Palenik,G.J.Palenik ACTA CRYSTALLOGR.,SECT.C:CRYST.STRUCT.COMMUN.,1988,44,168	bis(Aqua-dichloro-(\m~2~-pyridine-N-oxide-O,O)-copper(ii)).	1:1	1	1	κ2	M2	2	2-c N2O2Cu2	water, chloro	terminal	co-ligand	A*M2	A*M1)3	A*M2*M1)3	0D	0D	2	2	2M4-1	1,2,5M10-1
CAWZIL	J.A.Schlueter,H.Park,G.J.Halder,W.R.Armand,C.Dunmars,K.W.Chapman,J.L.Manson,J.Singleton,R.McDonald,A.Plonczak,J.Kang,C.Lee,M.-H.Whangbo,T.Lancaster,A.J.Steele,I.Franke,J.D.Wright,S.J.Blundell,F.L.Pratt,J.deGeorge,M.M.Turnbull,C.P.Landee INORG.CHEM.,2012,51,2121	catena-[(\m~2~-Pyrazine-N,N'-dioxide)-diaqua-dichloro-copper(ii)].	1:1	2	2	κ1	B2	2	none	chloro, water	terminal	co-ligand	A*B2	A*M1)4	A*B2*M1)4	1D	1D	none	none	2C1	2C1
CAWZOR	J.A.Schlueter,H.Park,G.J.Halder,W.R.Armand,C.Dunmars,K.W.Chapman,J.L.Manson,J.Singleton,R.McDonald,A.Plonczak,J.Kang,C.Lee,M.-H.Whangbo,T.Lancaster,A.J.Steele,I.Franke,J.D.Wright,S.J.Blundell,F.L.Pratt,J.deGeorge,M.M.Turnbull,C.P.Landee INORG.CHEM.,2012,51,2121	catena-[(\m~2~-Pyrazine-N,N'-dioxide)-diaqua-dibromo-copper(ii)].	1:1	2	2	κ1	B2	2	none	bromo, water	terminal	co-ligand	A*B2	A*M1)4	A*B2*M1)4	1D	1D	none	none	2C1	2C1
CECROU	Xiang-Lan Wang,Yuan-Xia Li,Shuai-Liang Yang,Chen-Xi Zhang,Qing-Lun Wang J.Coord.Chem.,2017,70,487	bis(\m-2-(4-chlorophenyl)-4,4,5,5-tetramethyl-3-imidazole-3-oxido-1-oxylradical)-hexakis(1,1,1,5,5,5-hexafluoroacetylacetonato)-tri-copper(ii).	3:2	2	2	κ1	B2	2, 1	none	acetylacetonato	terminal	co-ligand	A)3*B2)2	A*B01)2	A)3*B2)2*B01)6	0D	0D	3	3	1,2,2M5-1	1,1,2,3,4M11-1
CECRUA	Xiang-Lan Wang,Yuan-Xia Li,Shuai-Liang Yang,Chen-Xi Zhang,Qing-Lun Wang J.Coord.Chem.,2017,70,487	bis(\m-2-(4-fluorophenyl)-4,4,5,5-tetramethyl-3-imidazole-3-oxido-1-oxylradical)-hexakis(1,1,1,5,5,5-hexafluoroacetylacetonato)-tri-copper(ii).	3:2	2	2	κ1	B2	2, 1	none	acetylacetonato	terminal	co-ligand	A)3*B2)2	A*B01)2	A)3*B2)2*B01)6	0D	0D	3	3	1,2,2M5-1	1,1,2,3,4M11-1
CEGGOK	H.Knuuttila ACTA CHEM.SCAND.,1983,37,765	Dichloro-bis(nicotinic acid N-oxide)-copper(ii).	1:2	1	1	κ1	M1	2	none	chloro	terminal	co-ligand	A*M1)2	A*M1)2	A*M1)4	0D	0D	1	1	1,2M3-1	1,4M5-1
CEJZAT	E.Tretyakov,S.Fokin,G.Romanenko,V.Ikorskii,S.Vasilevsky,V.Ovcharenko INORG.CHEM.,2006,45,3671	catena-((M)-(\m~4~-1,4-bis(4-(4,4,5,5-Tetramethyl-3-oxide-1-oxyl-4,5-dihydro-1H-imidazol-2-yl)pyrazol-1-yl)butane-N,N',O,O')-tetrakis(1,1,1,5,5,5-hexafluoroacetylacetonato-O,O')-di-copper).	2:1	4	2	κ1	B2	1	none	acetylacetonato, pyrazol	increases connectivity	heterocyclic N-oxide and co-ligand	A)2*B2	A)2*B2*B01)4	A)2*K4*B01)4	0D	3D	2	none	1,2M3-1	dia; 4/6/c1; sqc6
CEJZOH	E.Tretyakov,S.Fokin,G.Romanenko,V.Ikorskii,S.Vasilevsky,V.Ovcharenko INORG.CHEM.,2006,45,3671	catena-((\m~3~-1,8-bis(4-(4,4,5,5-Tetramethyl-3-oxide-1-oxyl-4,5-dihydro-1H-imidazol-2-yl)pyrazol-1-yl)octane-N,N',O,O')-tetrakis(1,1,1,5,5,5-hexafluoroacetylacetonato-O,O')-di-copper monohydrate).	2:1	4	2	κ1	B2	2	none	pyrazol, acetylacetonato	increases connectivity	heterocyclic N-oxide and co-ligand	A)2*B2	A)2*B2*B01)4	A)2*K4*B01)4	1D	2D	none	none	2C1	sql
CEJZOH01	E.Tretyakov,S.Fokin,G.Romanenko,V.Ikorskii,S.Vasilevsky,V.Ovcharenko INORG.CHEM.,2006,45,3671	catena-((\m~3~-1,8-bis(4-(4,4,5,5-Tetramethyl-3-oxide-1-oxyl-4,5-dihydro-1H-imidazol-2-yl)pyrazol-1-yl)octane-N,N',O,O')-tetrakis(1,1,1,5,5,5-hexafluoroacetylacetonato-O,O')-di-copper monohydrate).	2:1	4	2	κ1	B2	2	none	acetylacetonato, pyrazol	increases connectivity	heterocyclic N-oxide and co-ligand	A)2*B2	A)2*B2*B01)4	A)2*K4*B01)4	1D	2D	none	none	2C1	sql
CEKMUA	J.S.Wood,C.P.Keijzers,R.O.Day ACTA CRYSTALLOGR.,SECT.C:CRYST.STRUCT.COMMUN.,1984,40,404	hexakis(Pyridine N-oxide)-copper(ii) dinitrate dihydrate.	1:6	1	1	κ1	M1	6	none	none	none	none	A*M1)6	none	A*M1)6	0D	0D	1	1	1,6M7-1	1,6M7-1
CELGIK	P.Cortes,A.M.Atria,M.T.Garland,R.Baggio ACTA CRYSTALLOGR.,SECT.C:CRYST.STRUCT.COMMUN.,2006,62,m311	(\m~4~-Oxo)-hexakis(\m~2~-chloro)-chloro-tetrakis(pyridineN-oxide-\kO)-tetra-copper(ii) hydrate.	1:1	1	1	κ1	M1	1	none	chloro, oxo	increases connectivity	co-ligand	A*M1	A)4*M4*M2)6	A)4*M4*M2)6*M1)4	0D	0D	1	4	1M2-1	1,2,4,5M15-1
CMPOCU	D.R.Johnson,W.H.Watson INORG.CHEM.,1971,10,1068	Dichloro-bis(4-methylpyridine-1-oxide)-copper(ii).	1:2	1	1	κ1	M1	2	none	chloro	terminal	co-ligand	A*M1)2	A*M1)2	A*M1)4	0D	0D	1	1	1,2M3-1	1,4M5-1
CMPYUC	D.R.Johnson,W.H.Watson INORG.CHEM.,1971,10,1281	bis(\m-4-methylpyridine-1-oxide)-tetrachloro-bis(4-methylpyridine-1-oxide)-di-copper(ii).	1:2	1	1	κ2, κ1	M2, M1	3	4-c N4O4Cu2	chloro	terminal	co-ligand	A*M2*M1	A*M1)2	A*M2*M1)3	0D	0D	2	2	1,2,3M6-1	1,2,5M10-1
COZJIN	Yan-Li Gao,K.Inoue TRANSITION MET.CHEM.,2020,45,195	bis(\m-[2-(4-bromophenyl)-4,4,5,5-tetramethyl-3-oxo-4,5-dihydro-1H-imidazol-1-yl]oxidanyl.	3:2	2	2	κ1	B2	2, 1	none	acetylacetonato	terminal	co-ligand	A)3*B2)2	A*B01)2	A)3*B2)2*B01)6	0D	0D	3	3	1,2,2M5-1	1,1,2,3,4M11-1
COZJIN01	Yan-Li Gao,K.Inoue TRANSITION MET.CHEM.,2020,45,195	bis(\m-[2-(4-bromophenyl)-4,4,5,5-tetramethyl-3-oxo-4,5-dihydro-1H-imidazol-1-yl]oxidanyl.	3:2	2	2	κ1	B2	2, 1	none	acetylacetonato	terminal	co-ligand	A)3*B2)2	A*B01)2	A)3*B2)2*B01)6	0D	0D	3	3	1,2,2M5-1	1,1,2,3,4M11-1
CPYOCU	J.C.Morrow J.CRYST.MOL.STRUCT.,1974,4,243	bis(Dichloro-bis(pyridine-1-oxide)-copper(ii)).	1:2	1	1	κ2, κ1	M2, M1	3	4-c N4O4Cu2	chloro	terminal	co-ligand	A*M2*M1	A*M1)2	A*M2*M1)3	0D	0D	2	2	1,2,3M6-1	1,2,5M10-1
CUCPYO	H.L.Schafer,J.C.Morrow,H.M.Smith AIP J.Chem.Phys.,1965,42,504	bis((\m~2~-Pyridine N-oxide-O,O)-dichloro-di-copper(ii)).	1:1	1	1	κ2	M2	2	2-c N2O2Cu2	chloro	increases connectivity	co-ligand	A*M2	A*M2*M1	A*M2)2*M1	0D	1D	2	none	2M4-1	2,4C4
CUCPYO11	R.S.Sager,R.J.Williams,W.H.Watson INORG.CHEM.,1967,6,951	bis((\m~2~-Pyridine N-oxide-O,O)-dichloro-di-copper(ii)).	1:1	1	1	κ2	M2	2	2-c N2O2Cu2	chloro	terminal	co-ligand	A*M2	A*M1)2	A*M2*M1)2	0D	0D	2	2	2M4-1	1,2,4M8-3
CUCPYO12	A.M.Atria,P.Cortes,M.T.Garland,R.Baggio ACTA CRYSTALLOGR.,SECT.E:STRUCT.REP.ONLINE,2003,59,m967	catena-(bis((\m~2~-Chloro)-(\m~2~-pyridineN-oxide-O,O))-di-chloro-di-copper(ii)).	1:1	1	1	κ2	M2	2	2-c N2O2Cu2	chloro	terminal	co-ligand	A*M2	A*M1)2	A*M2*M1)2	0D	0D	2	2	2M4-1	1,2,4M8-3
CUCPYO13	Ngong Kodiah Beyeh,R.Puttreddy DALTON TRANS.,2015,44,9881	bis(\m~2~-1-oxo-1-pyridine)-tetrachloro-di-copper(ii).	1:1	1	1	κ2	M2	2	2-c N2O2Cu2	chloro	increases connectivity	co-ligand	A*M2	A*M2*M1	A*M2)2*M1	0D	1D	2	none	2M4-1	2,4C4
CUNPYO10	Scavnicar S.,Matkovic B. ACTA CRYSTALLOGR.,SECT.B:STRUCT.CRYSTALLOGR.CRYST.CHEM.,1969,25,2046	bis(Pyridine-N-oxide)-copper(ii) nitrate.	1:2	1	1	κ2, κ1	M2, M1	3	4-c N4O4Cu2	nitrate	terminal	co-ligand	A*M2*M1	A*B01*M1	A*B01*M2*M1)2	0D	0D	2	2	1,2,3M6-1	1,2,5M10-1
DAGZAM	L.C.Porter,R.J.Doedens INORG.CHEM.,1985,24,1006	(\m~2~-Aqua)-bis((2,2,5,5-tetramethylpyrrolinyl-1-oxy)-(\m~2~-trichloroacetato-O,O')-(trichloroacetato-O)-copper(ii)).	1:1	1	1	κ1	M1	1	none	carboxylate	increases connectivity	co-ligand	A*M1	A)2*B2)2*M2*M1)2	A)2*B2)2*M2*M1)4	0D	0D	1	2	1M2-1	1,2,5M9-1
DANSIX	Binling Yao,Zhilin Guo,Xuan Zhang,Yue Ma,Zhenhao Yang,Qinglun Wang,Licun Li,Peng Cheng CRYST.GROWTH DES.,2017,17,95	hexakis(\m-2-(4-((5-(methoxycarbonyl)pyridin-3-yl)oxy)phenyl)-4,4,5,5-tetramethylimidazole 3-oxide 1-oxylradical)-tetradecakis(1,1,1,5,5,5-hexafluoroacetylacetonato)-hepta-copper.	7:6	2	2, 1	κ1	B2, M1	2, 1	none	pyridin, acetylacetonato	increases connectivity	heterocyclic N-oxide and co-ligand	A)7*B2)2*M1)4	A)7*B01)14*M1)6	A)7*T3)2*B2)4*B01)14	0D|0D	0D	1	7	1,2M3-1|1M2-1	1,1,1,2,2,3,4,4,4M27-1
DASVOK	F.S.Delgado,C.A.Jimenez,P.Lorenzo-Luis,J.Pasan,O.Fabelo,L.Canadillas-Delgado,F.Lloret,M.Julve,C.Ruiz-Perez CRYST.GROWTH DES.,2012,12,599	catena-((\m~2~-4,4'-bipyridine-N'N'-dioxide)-aqua-(malonato)-copper(ii)).	1:1	2	2	κ1	B2	2	none	acetylacetonato, water	terminal	co-ligand	A*B2	A*B01*M1	A*B2*B01*M1	1D	1D	none	none	2C1	2C1
DATJEO	You-Min SUN,Jing-Min SHI,Zhe LIU ACTA CRYSTALLOGR.,SECT.E:STRUCT.REP.ONLINE,2005,61,m1574	Dibromo-bis(3-methoxy-2-methylpyrazine 1-oxide-O)-copper(ii).	1:2	1	1	κ1	M1	2	none	bromo	terminal	co-ligand	A*M1)2	A*M1)2	A*M1)4	0D	0D	1	1	1,2M3-1	1,4M5-1
DEHRUF	Xiu-Mei Zhang,Wei Gao,Jie-Ping Liu,En-Qing Gao INORG.CHIM.ACTA,2012,392,311	catena-((\m~2~-4-(1-Hydroxy-1\l^5^-pyridin-3-yl)benzoato)-(\m~2~-azido)-copper).	1:1	1	1	κ2	M2	2	1D CuON	carboxylate, azido	increases connectivity	heterocyclic N-oxide and co-ligand	A*M2	A*B2*M2	A*T4*M2	1D	2D	none	none	2C1	4,6L26
DETFAK	Puszko A.,Wasylina L.,Pelczynska M.,Staszak Z.,Adach A.,Cieslak-Golonka M.,Kubiak M. J.INORG.BIOCHEM.,2007,101,117	trans-Dichloro-bis(2,5-dimethyl-4-nitropyridine N-oxide-O)-copper(ii).	1:2	1	1	κ1	M1	4	none	chloro	terminal	co-ligand	A*M1)2	A*M1)2	A*M1)4	0D	0D	1	1	1,2M3-1	1,4M5-1
DEXRAC	V.Romanov,A.Vorobev,I.Bagryanskaya,D.Parkhomenko,E.Tretyakov AUST.J.CHEM.,2017,70,1317	catena-((\m-2-(Pyrazolo[1,5-a]pyridine-3-yl)-4,4,5,5-tetramethyl-4,5-dihydro-1H-imidazole-3-oxide-1-oxylradical)-bis(1,1,1,5,5,5-hexafluoroacetylacetonato)-copper(ii)).	1:1	2	1	κ1	M1	1	none	acetylacetonato, pyrazol	increases connectivity	heterocyclic N-oxide and co-ligand	A*M1	A*B01)2*M1	A*B2*B01)2	0D	1D	1	none	1M2-1	2C1
DEYYAI	S.A.Bourne,L.J.Moitsheki J.Chem.Cryst.,2007,37,359	(\m~2~-4,4'-Bipyridine-N,N'-dioxide-O,O')-diaqua-tetrachloro-bis(4,4'-bipyridine-N,N'-dioxide-O)-di-copper(ii) dimethylsulfoxide solvate.	2:3	2	2, 1	κ1	B2, M1	2	none	water, chloro	terminal	co-ligand	A)2*B2*M1)2	A*M1)3	A)2*B2*M1)8	0D	0D	2	2	1,2,2M5-1	1,2,5M11-1
DICZUM	Yu Xiao,Qiu Shi Gong,Zhong Qiu Li,Jing Jing Guo,Chao Feng,Shu Hua Zhang J.Coord.Chem.,2013,66,2004	(\m~2~-4,4'-Bipyridyl-N,N'-dioxide)-tetrakis(2,4-dichloro-6-(dimethylaminomethyl)phenolato)-di-copper.	2:1	1	2	κ1	B2	1	none	aminophenolato	terminal	co-ligand	A)2*B2	A*B01)2	A)2*B2*B01)4	0D	0D	2	2	1,2M3-1	1,2,3M7-2
DORYIS	L.C.Porter,M.H.Dickman,R.J.Doedens INORG.CHEM.,1986,25,678	tetrakis(\m~2~-Trichloroacetato-O,O')-bis(2,2,5,5-tetramethyl-pyrrolinyl-1-oxy)-di-copper(ii).	1:1	1	1	κ1	M1	1	none	carboxylate	increases connectivity	co-ligand	A*M1	A*B2)2	A*B2)2*M1	0D	0D	1	2	1M2-1	1,2,5M8-2
DUNYUG10	F.Pavelcik 22).,1987,41,433	tetrakis(Dichloroacetato-O)-bis(\m~2~-pyridine-N-oxido-O,O)-bis(pyridine-N-oxido-O)-di-copper(ii).	1:2	1	1	κ2, κ1	M2, M1	3	4-c N4O4Cu2	carboxylate	terminal	co-ligand	A*M2*M1	A*M1)2	A*M2*M1)3	0D	0D	2	2	1,2,3M6-1	1,2,5M10-1
DURYIY	F.Nepveu,H.Astheimer,H.Paulus,W.Haase J.Coord.Chem.,1986,14,269	bis((\m~2~-4-Methylpyridine-1-oxide-O)-dibromo-copper(ii)).	1:1	1	1	κ2	M2	2	2-c N2O2Cu2	bromo	terminal	co-ligand	A*M2	A*M1)2	A*M2*M1)2	0D	0D	2	2	2M4-1	1,2,4M8-3
DUWYID	J.Laugier,P.Rey,C.Benelli,D.Gatteschi,C.Zanchini J.AM.CHEM.SOC.,1986,108,6931	Dichloro-bis(2-phenyl-4,4,5,5-tetramethylimidazoline-1-oxyl3-oxide)-copper(ii).	1:2	2	1	κ1	M1	2	none	chloro	terminal	co-ligand	A*M1)2	A*M1)2	A*M1)4	0D	0D	1	1	1,2M3-1	1,4M5-1
DUWYID01	E.Ressouche,J.-X.Boucherle,B.Gillon,P.Rey,J.Schweizer J.AM.CHEM.SOC.,1993,115,3610	bis(2-Phenyl-4,4,5,5-tetramethyl-4,5-dihydro-1H-imidazolyl-1-oxyl3-oxide-O,O')-dichloro-copper(ii).	1:2	2	1	κ1	M1	2	none	chloro	terminal	co-ligand	A*M1)2	A*M1)2	A*M1)4	0D	0D	1	1	1,2M3-1	1,4M5-1
ECIKUZ	D.B.Dell'Amico,S.Ciattini,L.Fioravanti,L.Labella,F.Marchetti,C.A.Mattei,S.Samaritani POLYHEDRON,2018,139,107	catena-[bis(\m-4,4'-bipyridine)-tetrakis(1,1,1,5,5,5-hexafluoroacetylacetonato)-di-copper(ii)].	1:1	1	1	κ1	M1	2	none	pyridin, acetylacetonato	increases connectivity	heterocyclic N-oxide and co-ligand	A*M1	A*B01)2*M1	A*B2*B01)2	0D	1D	1	none	1,2M3-1	2C1
EHUPEF	Tolstikov S.,Golomolzina I.,Fokin S.V.,Bogomyakov A.,Morozov V.,Tumanov S.,Minakova O.,Veber S.,Fedin M.V.,Gromilov S.A.,Romanenko G.V.,Ovcharenko V. CRYST.GROWTH DES.,2020,21,260	catena-[(\m-2-(1-ethylimidazol-5-yl)-4,4,5,5-tetramethyl-4,5-dihydro-1H-imidazole 3-oxide-1-oxylradical)-bis(1,1,1,5,5,5-hexafluoropentan-2,4-dionato)-copper(ii)].	1:1	2	1	κ1	M1	1	none	acetylacetonato, imidazol	increases connectivity	heterocyclic N-oxide and co-ligand	A*M1	A*B01)2*M1	A*B2*B01)2	0D	1D	1	none	1M2-1	2C1
EHUPEF01	S.Tolstikov,I.Golomolzina,S.V.Fokin,A.Bogomyakov,V.Morozov,S.Tumanov,O.Minakova,S.Veber,M.V.Fedin,S.A.Gromilov,G.V.Romanenko,V.Ovcharenko CRYST.GROWTH DES.,2020,21,260	catena-[(\m-2-(1-ethylimidazol-5-yl)-4,4,5,5-tetramethyl-4,5-dihydro-1H-imidazole 3-oxide-1-oxylradical)-bis(1,1,1,5,5,5-hexafluoropentan-2,4-dionato)-copper(ii)].	1:1	2	1	κ1	M1	1	none	imidazole, acetylacetonato	increases connectivity	heterocyclic N-oxide and co-ligand	A*M1	A*B01)2*M1	A*B2*B01)2	0D	1D	1	none	1M2-1	2C1
EHUPEF02	S.Tolstikov,I.Golomolzina,S.V.Fokin,A.Bogomyakov,V.Morozov,S.Tumanov,O.Minakova,S.Veber,M.V.Fedin,S.A.Gromilov,G.V.Romanenko,V.Ovcharenko CRYST.GROWTH DES.,2020,21,260	catena-[(\m-2-(1-ethylimidazol-5-yl)-4,4,5,5-tetramethyl-4,5-dihydro-1H-imidazole 3-oxide-1-oxylradical)-bis(1,1,1,5,5,5-hexafluoropentan-2,4-dionato)-copper(ii)].	1:1	2	1	κ1	M1	1	none	imidazole, acetylacetonato	increases connectivity	heterocyclic N-oxide and co-ligand	A*M1	A*B01)2*M1	A*B2*B01)2	0D	1D	1	none	1M2-1	2C1
EHUPEF03	S.Tolstikov,I.Golomolzina,S.V.Fokin,A.Bogomyakov,V.Morozov,S.Tumanov,O.Minakova,S.Veber,M.V.Fedin,S.A.Gromilov,G.V.Romanenko,V.Ovcharenko CRYST.GROWTH DES.,2020,21,260	catena-[(\m-2-(1-ethylimidazol-5-yl)-4,4,5,5-tetramethyl-4,5-dihydro-1H-imidazole 3-oxide-1-oxylradical)-bis(1,1,1,5,5,5-hexafluoropentan-2,4-dionato)-copper(ii)].	1:1	2	1	κ1	M1	1	none	imidazole, acetylacetonato	increases connectivity	heterocyclic N-oxide and co-ligand	A*M1	A*B01)2*M1	A*B2*B01)2	0D	1D	1	none	1M2-1	2C1
EHUPEF04	S.Tolstikov,I.Golomolzina,S.V.Fokin,A.Bogomyakov,V.Morozov,S.Tumanov,O.Minakova,S.Veber,M.V.Fedin,S.A.Gromilov,G.V.Romanenko,V.Ovcharenko CRYST.GROWTH DES.,2020,21,260	catena-[(\m-2-(1-ethylimidazol-5-yl)-4,4,5,5-tetramethyl-4,5-dihydro-1H-imidazole 3-oxide-1-oxylradical)-bis(1,1,1,5,5,5-hexafluoropentan-2,4-dionato)-copper(ii)].	1:1	2	1	κ1	M1	1	none	imidazole, acetylacetonato	increases connectivity	heterocyclic N-oxide and co-ligand	A*M1	A*B01)2*M1	A*B2*B01)2	0D	1D	1	none	1M2-1	2C1
EHUPEF05	S.Tolstikov,I.Golomolzina,S.V.Fokin,A.Bogomyakov,V.Morozov,S.Tumanov,O.Minakova,S.Veber,M.V.Fedin,S.A.Gromilov,G.V.Romanenko,V.Ovcharenko CRYST.GROWTH DES.,2020,21,260	catena-[(\m-2-(1-ethylimidazol-5-yl)-4,4,5,5-tetramethyl-4,5-dihydro-1H-imidazole 3-oxide-1-oxylradical)-bis(1,1,1,5,5,5-hexafluoropentan-2,4-dionato)-copper(ii)].	1:1	2	1	κ1	M1	1	none	imidazole, acetylacetonato	increases connectivity	heterocyclic N-oxide and co-ligand	A*M1	A*B01)2*M1	A*B2*B01)2	0D	1D	1	none	1M2-1	2C1
ENOJUO	V.Ovcharenko,S.Fokin,E.Chubakova,G.Romanenko,A.Bogomyakov,Z.Dobrokhotova,N.Lukzen,V.Morozov,M.Petrova,M.Petrova,E.Zueva,I.Rozentsveig,E.Rudyakova,G.Levkovskaya,R.Sagdeev INORG.CHEM.,2016,55,5853	bis(\m-2-(1-butyl-3-ethyl-1H-pyrazol-4-yl)-4,4,5,5-tetramethyl-4,5-dihydro-1H-3-imidazole-3-oxo-1-oxylradical)-hexakis(1,1,1,5,5,5-hexafluoroacetylacetonato)-tri-copper(ii).	3:2	2	1	κ1	M1	2	none	pyrazol, acetylacetonato	increases connectivity	heterocyclic N-oxide and co-ligand	A)3*M1)2	A)3*B01)6*M1)2	A)3*B2)2*B01)6	0D	0D	1	3	1,2M3-1	1,1,2,3,4M11-1
ENOKAV	V.Ovcharenko,S.Fokin,E.Chubakova,G.Romanenko,A.Bogomyakov,Z.Dobrokhotova,N.Lukzen,V.Morozov,M.Petrova,M.Petrova,E.Zueva,I.Rozentsveig,E.Rudyakova,G.Levkovskaya,R.Sagdeev INORG.CHEM.,2016,55,5853	tetrakis(\m-2-(1-butyl-3-ethyl-1H-pyrazol-4-yl)-4,4,5,5-tetramethyl-4,5-dihydro-1H-3-imidazole-3-oxo-1-oxylradical)-decakis(1,1,1,5,5,5-hexafluoroacetylacetonato)-penta-copper.	5:4	2	2, 1	κ1	B2, M1	2, 1	none	pyrazol, acetylacetonato	increases connectivity	heterocyclic N-oxide and co-ligand	A)5*B2)2*M1)2	A)5*B01)10*M1)2	A)5*B2)4*B01)10	0D	0D	1	5	1,2M3-1	1,1,1,2,2,3,4,4M17-X new
ENOKAV01	V.Ovcharenko,S.Fokin,E.Chubakova,G.Romanenko,A.Bogomyakov,Z.Dobrokhotova,N.Lukzen,V.Morozov,M.Petrova,M.Petrova,E.Zueva,I.Rozentsveig,E.Rudyakova,G.Levkovskaya,R.Sagdeev INORG.CHEM.,2016,55,5853	tetrakis(\m-2-(1-butyl-3-ethyl-1H-pyrazol-4-yl)-4,4,5,5-tetramethyl-4,5-dihydro-1H-3-imidazole-3-oxo-1-oxylradical)-decakis(1,1,1,5,5,5-hexafluoroacetylacetonato)-penta-copper.	5:4	2	2, 1	κ1	B2, M1	2, 1	none	pyrazol, acetylacetonato	increases connectivity	heterocyclic N-oxide and co-ligand	A)5*B2)2*M1)2	A)5*B01)10*M1)2	A)5*B2)4*B01)10	0D	0D	1	5	1,2M3-1	1,1,1,2,2,3,4,4M17-X new
ENOKAV02	V.Ovcharenko,S.Fokin,E.Chubakova,G.Romanenko,A.Bogomyakov,Z.Dobrokhotova,N.Lukzen,V.Morozov,M.Petrova,M.Petrova,E.Zueva,I.Rozentsveig,E.Rudyakova,G.Levkovskaya,R.Sagdeev INORG.CHEM.,2016,55,5853	tetrakis(\m-2-(1-butyl-3-ethyl-1H-pyrazol-4-yl)-4,4,5,5-tetramethyl-4,5-dihydro-1H-3-imidazole-3-oxo-1-oxylradical)-decakis(1,1,1,5,5,5-hexafluoroacetylacetonato)-penta-copper.	5:4	2	2, 1	κ1	B2, M1	2, 1	none	pyrazol, acetylacetonato	increases connectivity	heterocyclic N-oxide and co-ligand	A)5*B2)2*M1)2	A)5*B01)10*M1)2	A)5*B2)4*B01)10	0D	0D	1	5	1,2M3-1	1,1,1,2,2,3,4,4M17-X new
ENOKAV03	V.Ovcharenko,S.Fokin,E.Chubakova,G.Romanenko,A.Bogomyakov,Z.Dobrokhotova,N.Lukzen,V.Morozov,M.Petrova,M.Petrova,E.Zueva,I.Rozentsveig,E.Rudyakova,G.Levkovskaya,R.Sagdeev INORG.CHEM.,2016,55,5853	tetrakis(\m-2-(1-butyl-3-ethyl-1H-pyrazol-4-yl)-4,4,5,5-tetramethyl-4,5-dihydro-1H-3-imidazole-3-oxo-1-oxylradical)-decakis(1,1,1,5,5,5-hexafluoroacetylacetonato)-penta-copper.	5:4	2	2, 1	κ1	B2, M1	2, 1	none	pyrazol, acetylacetonato	increases connectivity	heterocyclic N-oxide and co-ligand	A)5*B2)2*M1)2	A)5*B01)10*M1)2	A)5*B2)4*B01)10	0D	0D	1	5	1,2M3-1	1,1,1,2,2,3,4,4M17-X new
ENOKAV04	V.Ovcharenko,S.Fokin,E.Chubakova,G.Romanenko,A.Bogomyakov,Z.Dobrokhotova,N.Lukzen,V.Morozov,M.Petrova,M.Petrova,E.Zueva,I.Rozentsveig,E.Rudyakova,G.Levkovskaya,R.Sagdeev INORG.CHEM.,2016,55,5853	tetrakis(\m-2-(1-butyl-3-ethyl-1H-pyrazol-4-yl)-4,4,5,5-tetramethyl-4,5-dihydro-1H-3-imidazole-3-oxo-1-oxylradical)-decakis(1,1,1,5,5,5-hexafluoroacetylacetonato)-penta-copper.	5:4	2	2, 1	κ1	B2, M1	2, 1	none	pyrazol, acetylacetonato	increases connectivity	heterocyclic N-oxide and co-ligand	A)5*B2)2*M1)2	A)5*B01)10*M1)2	A)5*B2)4*B01)10	0D	0D	1	5	1,2M3-1	1,1,1,2,2,3,4,4M17-X new
ENOLAW	V.Ovcharenko,S.Fokin,E.Chubakova,G.Romanenko,A.Bogomyakov,Z.Dobrokhotova,N.Lukzen,V.Morozov,M.Petrova,M.Petrova,E.Zueva,I.Rozentsveig,E.Rudyakova,G.Levkovskaya,R.Sagdeev INORG.CHEM.,2016,55,5853	catena-[bis(\m-2-(1-methyl-3-ethyl-1H-pyrazol-4-yl)-4,4,5,5-tetramethyl-4,5-dihydro-1H-3-imidazole-3-oxo-1-oxylradical)-tetrakis(1,1,1,5,5,5-hexafluoroacetylacetonato)-di-copper(ii)].	1:1	2	1	κ1	M1	2	none	pyrazol, acetylacetonato	increases connectivity	heterocyclic N-oxide and co-ligand	A*M1	A*B01)2*M1	A*B2*B01)2	0D	1D	1	none	1,2M3-1	2C1
ENOLAW01	V.Ovcharenko,S.Fokin,E.Chubakova,G.Romanenko,A.Bogomyakov,Z.Dobrokhotova,N.Lukzen,V.Morozov,M.Petrova,M.Petrova,E.Zueva,I.Rozentsveig,E.Rudyakova,G.Levkovskaya,R.Sagdeev INORG.CHEM.,2016,55,5853	catena-[tetrakis(\m-2-(1-methyl-3-ethyl-1H-pyrazol-4-yl)-4,4,5,5-tetramethyl-4,5-dihydro-1H-3-imidazole-3-oxo-1-oxylradical)-octakis(1,1,1,5,5,5-hexafluoroacetylacetonato)-tetra-copper].	1:1	2	1	κ1	M1	2	none	pyrazol, acetylacetonato	increases connectivity	heterocyclic N-oxide and co-ligand	A*M1	A*B01)2*M1	A*B2*B01)2	0D	1D	1	none	1,2M3-1	2C1
ENOLAW02	V.Ovcharenko,S.Fokin,E.Chubakova,G.Romanenko,A.Bogomyakov,Z.Dobrokhotova,N.Lukzen,V.Morozov,M.Petrova,M.Petrova,E.Zueva,I.Rozentsveig,E.Rudyakova,G.Levkovskaya,R.Sagdeev INORG.CHEM.,2016,55,5853	catena-[tetrakis(\m-2-(1-methyl-3-ethyl-1H-pyrazol-4-yl)-4,4,5,5-tetramethyl-4,5-dihydro-1H-3-imidazole-3-oxo-1-oxylradical)-octakis(1,1,1,5,5,5-hexafluoroacetylacetonato)-tetra-copper].	1:1	2	1	κ1	M1	2	none	pyrazol, acetylacetonato	increases connectivity	heterocyclic N-oxide and co-ligand	A*M1	A*B01)2*M1	A*B2*B01)2	0D	1D	1	none	1,2M3-1	2C1
ENOLAW03	V.Ovcharenko,S.Fokin,E.Chubakova,G.Romanenko,A.Bogomyakov,Z.Dobrokhotova,N.Lukzen,V.Morozov,M.Petrova,M.Petrova,E.Zueva,I.Rozentsveig,E.Rudyakova,G.Levkovskaya,R.Sagdeev INORG.CHEM.,2016,55,5853	catena-[tetrakis(\m-2-(1-methyl-3-ethyl-1H-pyrazol-4-yl)-4,4,5,5-tetramethyl-4,5-dihydro-1H-3-imidazole-3-oxo-1-oxylradical)-octakis(1,1,1,5,5,5-hexafluoroacetylacetonato)-tetra-copper].	1:1	2	1	κ1	M1	2	none	pyrazol, acetylacetonato	increases connectivity	heterocyclic N-oxide and co-ligand	A*M1	A*B01)2*M1	A*B2*B01)2	0D	1D	1	none	1,2M3-1	2C1
ENOLAW04	V.Ovcharenko,S.Fokin,E.Chubakova,G.Romanenko,A.Bogomyakov,Z.Dobrokhotova,N.Lukzen,V.Morozov,M.Petrova,M.Petrova,E.Zueva,I.Rozentsveig,E.Rudyakova,G.Levkovskaya,R.Sagdeev INORG.CHEM.,2016,55,5853	catena-[tetrakis(\m-2-(1-methyl-3-ethyl-1H-pyrazol-4-yl)-4,4,5,5-tetramethyl-4,5-dihydro-1H-3-imidazole-3-oxo-1-oxylradical)-octakis(1,1,1,5,5,5-hexafluoroacetylacetonato)-tetra-copper].	1:1	2	1	κ1	M1	2	none	pyrazol, acetylacetonato	increases connectivity	heterocyclic N-oxide and co-ligand	A*M1	A*B01)2*M1	A*B2*B01)2	0D	1D	1	none	1,2M3-1	2C1
ENOLAW05	V.Ovcharenko,S.Fokin,E.Chubakova,G.Romanenko,A.Bogomyakov,Z.Dobrokhotova,N.Lukzen,V.Morozov,M.Petrova,M.Petrova,E.Zueva,I.Rozentsveig,E.Rudyakova,G.Levkovskaya,R.Sagdeev INORG.CHEM.,2016,55,5853	catena-[tetrakis(\m-2-(1-methyl-3-ethyl-1H-pyrazol-4-yl)-4,4,5,5-tetramethyl-4,5-dihydro-1H-3-imidazole-3-oxo-1-oxylradical)-octakis(1,1,1,5,5,5-hexafluoroacetylacetonato)-tetra-copper].	1:1	2	1	κ1	M1	2	none	pyrazol, acetylacetonato	increases connectivity	heterocyclic N-oxide and co-ligand	A*M1	A*B01)2*M1	A*B2*B01)2	0D	1D	1	none	1,2M3-1	2C1
ENOLAW06	V.Ovcharenko,S.Fokin,E.Chubakova,G.Romanenko,A.Bogomyakov,Z.Dobrokhotova,N.Lukzen,V.Morozov,M.Petrova,M.Petrova,E.Zueva,I.Rozentsveig,E.Rudyakova,G.Levkovskaya,R.Sagdeev INORG.CHEM.,2016,55,5853	catena-[tetrakis(\m-2-(1-methyl-3-ethyl-1H-pyrazol-4-yl)-4,4,5,5-tetramethyl-4,5-dihydro-1H-3-imidazole-3-oxo-1-oxylradical)-octakis(1,1,1,5,5,5-hexafluoroacetylacetonato)-tetra-copper].	1:1	2	1	κ1	M1	2	none	pyrazol, acetylacetonato	increases connectivity	heterocyclic N-oxide and co-ligand	A*M1	A*B01)2*M1	A*B2*B01)2	0D	1D	1	none	1,2M3-1	2C1
EPUFAX	O.N.Chupakhin,E.V.Tretyakov,I.A.Utepova,M.V.Varaksin,G.V.Romanenko,A.S.Bogomyakov,S.L.Veber,V.I.Ovcharenko POLYHEDRON,2011,30,647	catena-(bis(\m~3~-4,4,5,5-tetramethyl-2-(1-oxidopyrazin-2-yl)-4,5-dihydro-1H-imidazol-1-olato3-oxide)-hexakis(1,1,1,5,5,5-hexafluoropentane-2,4-dionato)-tri-copper).	3:2	3	2	κ1	B2	2, 1	none	1-oxidopyrazin-2-yl, acetylacetonato	increases connectivity	heterocyclic N-oxide and co-ligand	A)3*B2)2	A)3*B01)6*M1)2	A)3*T3)2*B01)6	0D	1D	3	none	1,2,2M5-1	2,2,3C6
ERAWUQ	F.Pointillart,T.Cauchy,Y.Le Gal,S.Golhen,O.Cador,L.Ouahab INORG.CHEM.,2010,49,1947	trans-bis(4-(2-Pyridyl-N-oxide-carbamoyl)tetrathiafulvalene)-bis(1,1,1,5,5,5-hexafluoroacetylacetonato)-copper(ii).	1:2	1	1	κ1	M1	2	none	acetylacetonato	terminal	co-ligand	A*M1)2	A*B01)2	A*B01)2*M1)2	0D	0D	1	1	1,2M3-1	1,4M5-1
EVOXEU	A.V.Artemev,O.V.Vysotskaya,L.A.Oparina,A.S.Bogomyakov,S.S.Khutsishvili,I.V.Sterkhova,V.I.Ovcharenko,B.A.Trofimov POLYHEDRON,2016,119,293	catena-[bis(\m-(4-((3-ethoxy-3-oxoprop-1-en-1-yl)oxy)-2,2,6,6-tetramethylpiperidin-1-yl)oxyradical)-tetrakis(1,1,1,5,5,5-hexafluoroacetylacetonato)-di-copper(ii)].	1:1	1	1	κ1	M1	2	none	acetylacetonato, carbonyl	increases connectivity	heterocyclic N-oxide and co-ligand	A*M1	A*B01)2*M1	A*B2*B01)2	0D	1D	1	none	1,2M3-1	2C1
FAPOCU01	Yan-Li Gao,K.Inoue TRANSITION MET.CHEM.,2019,44,283	catena-((\m-4-hydroxy-2,2,6,6-tetramethylpiperidin-1-oxylradical)-bis(1,1,1,5,5,5-hexafluoroacetylacetonato)-copper(ii)).	1:1	1	1	κ1	M1	1	none	acetylacetonato, hydroxyl	increases connectivity	heterocyclic N-oxide and co-ligand	A*M1	A*B01)2*M1	A*B2*B01)2	0D	1D	1	none	1M2-1	2C1
FETCUC	D.Gatteschi,J.Laugier,P.Rey,C.Zanchini INORG.CHEM.,1987,26,938	bis(Hexafluoroacetylacetonato-O,O')-(2-phenyl-4,4,5,5-tetramethyl-imidazoline-1-oxyl 3-oxide)-copper(ii).	1:1	2	1	κ1	M1	1	none	acetylacetonato	terminal	co-ligand	A*M1	A*B01)2	A*B01)2*M1	0D	0D	1	1	1M2-1	1,3M4-1
FETDAJ	D.Gatteschi,J.Laugier,P.Rey,C.Zanchini INORG.CHEM.,1987,26,938	bis(Hexafluoroacetylacetonato-O,O')-bis(2-phenyl-4,4,5,5-tetramethyl-imidazoline-1-oxyl 3-oxide)-copper(ii).	1:2	2	1	κ1	M1	2	none	acetylacetonato	terminal	co-ligand	A*M1)2	A*B01)2	A*B01)2*M1)2	0D	0D	1	1	1,2M3-1	1,4M5-1
FIDSUG	A.Caneschi,D.Gatteschi,J.Laugier,P.Rey J.AM.CHEM.SOC.,1987,109,2191	catena((\m~2~-2,4,4,5,5-Pentamethyl-1-oxyimidazoline-3-oxide-O,O')-bis(hexafluoroacetylacetonato-O,O')-copper(ii)).	1:1	2	2	κ1	B2	2	none	acetylacetonato	terminal	co-ligand	A*B2	A*B01)2	A*B2*B01)2	1D	1D	none	none	2C1	2C1
FURCOK10	N.V.Pervukhina,N.V.Podberezskaya,V.I.Ovcharenko,S.V.Larionov Zh.Strukt.Khim.(Russ.)(J.Struct.Chem.),1991,32,123-1	bis(\m~2~-4-Phenyl-2,2,5,5-tetramethyl-3-imidazoline-1-oxyl-N,O)-tris(bis(hexafluoroacetylacetonato)-copper(ii)).	3:1	1	1	κ1	M1	2	none	acetylacetonato, imidazoline	increases connectivity	heterocyclic N-oxide and co-ligand	A)3*M1)2	A)3*B01)6*M1)2	A)3*B2)2*B01)6	0D	0D	1	3	1,2M3-1	1,1,2,3,4M11-1
GAMCOM	A.Caneschi,D.Gatteschi,A.Grand,J.Laugier,L.Parkanyi,P.Rey INORG.CHEM.,1988,27,1031	bis(Trifluoroacetylacetonato-O,O')-(2,4,4,5,5-pentamethyl-4,5-dihydro-1H-imidazolyl-1-oxy 3-oxide-O)-copper(ii).	1:1	2	1	κ1	M1	1	none	acetylacetonato	terminal	co-ligand	A*M1	A*B01)2	A*B01)2*M1	0D	0D	1	1	1M2-1	1,3M4-1
GELGAF	A.Caneschi,D.Gatteschi,R.Sessoli,S.K.Hoffmann,J.Laugier,P.Rey INORG.CHEM.,1988,27,2390	bis(\m~2~-2-Ethyl-4,4,5,5-tetramethyl-4,5-dihydro-1H-imidazolyl-3-oxide-1-oxy)-hexakis(hexafluoroacetylacetonato-O,O')-tri-copper(ii).	3:2	2	2	κ1	B2	2, 1	none	acetylacetonato	terminal	co-ligand	A)3*B2)2	A*B01)2	A)3*B2)2*B01)6	0D	0D	3	3	1,2,2M5-1	1,1,2,3,4M11-1
GELSUN	S.V.Fokin,S.E.Tolstikov,E.V.Tret'yakov,G.V.Romanenko,A.S.Bogomyakov,S.L.Veber,R.Z.Sagdeev,V.I.Ovcharenko IZV.AKAD.NAUK SSSR,SER.KHIM.(RUSS.)(RUSS.CHEM.BULL.),2011,2423	catena-(bis(\m~2~-2-(isoxazol-4-yl)-4,4,5,5-tetramethyl-4,5-dihydro-1H-imidazole-3-oxide-1-oxyl-O,O')-tetrakis(1,1,1,5,5,5-hexafluoropentane-2,4-dionato-O,O')-di-copper(ii)).	1:1	2	2	κ1	B2	2	none	acetylacetonato	terminal	co-ligand	A*B2	A*B01)2	A*B2*B01)2	1D	1D	none	none	2C1	2C1
GELTAU	S.V.Fokin,S.E.Tolstikov,E.V.Tret'yakov,G.V.Romanenko,A.S.Bogomyakov,S.L.Veber,R.Z.Sagdeev,V.I.Ovcharenko IZV.AKAD.NAUK SSSR,SER.KHIM.(RUSS.)(RUSS.CHEM.BULL.),2011,2423	catena-(bis(\m~3~-2-(isoxazol-4-yl)-4,4,5,5-tetramethyl-4,5-dihydro-1H-imidazole-3-oxide-1-oxyl-N,O,O')-octakis(1,1,1,5,5,5-hexafluoropentane-2,4-dionato-O, O')-tetra-copper(ii)).	2:1	2	2	κ1	B2	2	none	isoxazol, acetylacetonato	increases connectivity	heterocyclic N-oxide and co-ligand	A)2*B2	A)2*B01)4*M1	A)2*T3*B01)4	1D	1D	none	none	2C1	2C1
GELTEY	S.V.Fokin,S.E.Tolstikov,E.V.Tret'yakov,G.V.Romanenko,A.S.Bogomyakov,S.L.Veber,R.Z.Sagdeev,V.I.Ovcharenko IZV.AKAD.NAUK SSSR,SER.KHIM.(RUSS.)(RUSS.CHEM.BULL.),2011,2423	catena-(bis(\m~3~-2-(3,5-dimethylisoxazol-4-yl)-4,4,5,5-tetramethyl-4,5-dihydro-1H-imidazole-3-oxide-1-oxyl-N,O,O')-octakis(1,1,1,5,5,5-hexafluoropentane-2, 4-dionato-O,O')-tetra-copper(ii)).	2:1	2	2	κ1	B2	2	none	isoxazol, acetylacetonato	increases connectivity	heterocyclic N-oxide and co-ligand	A)2*B2	A)2*B01)4*M1	A)2*T3*B01)4	1D	1D	none	none	2C1	2C1
GELTEY01	S.V.Fokin,S.E.Tolstikov,E.V.Tret'yakov,G.V.Romanenko,A.S.Bogomyakov,S.L.Veber,R.Z.Sagdeev,V.I.Ovcharenko IZV.AKAD.NAUK SSSR,SER.KHIM.(RUSS.)(RUSS.CHEM.BULL.),2011,2423	catena-(bis(\m~3~-2-(3,5-dimethylisoxazol-4-yl)-4,4,5,5-tetramethyl-4,5-dihydro-1H-imidazole-3-oxide-1-oxyl-N,O,O')-octakis(1,1,1,5,5,5-hexafluoropentane-2, 4-dionato-O,O')-tetra-copper(ii)).	2:1	2	2	κ1	B2	2	none	acetylacetonato, isoxazol	increases connectivity	heterocyclic N-oxide and co-ligand	A)2*B2	A)2*B01)4*M1	A)2*T3*B01)4	1D	1D	none	none	2C1	2C1
GELTIC	S.V.Fokin,S.E.Tolstikov,E.V.Tret'yakov,G.V.Romanenko,A.S.Bogomyakov,S.L.Veber,R.Z.Sagdeev,V.I.Ovcharenko IZV.AKAD.NAUK SSSR,SER.KHIM.(RUSS.)(RUSS.CHEM.BULL.),2011,2423	catena-(bis(\m~2~-2-(3,5-dimethylisoxazol-4-yl)-4,4,5,5-tetramethyl-4,5-dihydro-1H-imidazole-3-oxide-1-oxyl-N,O)-tetrakis(1,1,1,5,5,5-hexafluoropentane-2,4-dionato-O,O')-di-copper(ii)).	1:1	2	1	κ1	M1	2	none	isoxazol, acetylacetonato	increases connectivity	heterocyclic N-oxide and co-ligand	A*M1	A*B01)2*M1	A*B2*B01)2	0D	1D	1	none	1,2M3-1	2C1
GELTIC01	S.V.Fokin,S.E.Tolstikov,E.V.Tret'yakov,G.V.Romanenko,A.S.Bogomyakov,S.L.Veber,R.Z.Sagdeev,V.I.Ovcharenko IZV.AKAD.NAUK SSSR,SER.KHIM.(RUSS.)(RUSS.CHEM.BULL.),2011,2423	catena-(bis(\m~2~-2-(3,5-dimethylisoxazol-4-yl)-4,4,5,5-tetramethyl-4,5-dihydro-1H-imidazole-3-oxide-1-oxyl-N,O)-tetrakis(1,1,1,5,5,5-hexafluoropentane-2,4-dionato-O,O')-di-copper(ii)).	1:1	2	1	κ1	M1	2	none	isoxazol, acetylacetonato	increases connectivity	heterocyclic N-oxide and co-ligand	A*M1	A*B01)2*M1	A*B2*B01)2	0D	1D	1	none	1,2M3-1	2C1
GELTIC02	S.V.Fokin,S.E.Tolstikov,E.V.Tret'yakov,G.V.Romanenko,A.S.Bogomyakov,S.L.Veber,R.Z.Sagdeev,V.I.Ovcharenko IZV.AKAD.NAUK SSSR,SER.KHIM.(RUSS.)(RUSS.CHEM.BULL.),2011,2423	catena-(bis(\m~2~-2-(3,5-dimethylisoxazol-4-yl)-4,4,5,5-tetramethyl-4,5-dihydro-1H-imidazole-3-oxide-1-oxyl-N,O)-tetrakis(1,1,1,5,5,5-hexafluoropentane-2,4-dionato-O,O')-di-copper(ii)).	1:1	2	1	κ1	M1	2	none	acetylacetonato, isoxazol	increases connectivity	heterocyclic N-oxide and co-ligand	A*M1	A*B01)2*M1	A*B2*B01)2	0D	1D	1	none	1,2M3-1	2C1
GELTIC03	S.V.Fokin,S.E.Tolstikov,E.V.Tret'yakov,G.V.Romanenko,A.S.Bogomyakov,S.L.Veber,R.Z.Sagdeev,V.I.Ovcharenko IZV.AKAD.NAUK SSSR,SER.KHIM.(RUSS.)(RUSS.CHEM.BULL.),2011,2423	catena-(bis(\m~2~-2-(3,5-dimethylisoxazol-4-yl)-4,4,5,5-tetramethyl-4,5-dihydro-1H-imidazole-3-oxide-1-oxyl-N,O)-tetrakis(1,1,1,5,5,5-hexafluoropentane-2,4-dionato-O,O')-di-copper(ii)).	1:1	2	1	κ1	M1	2	none	acetylacetonato, isoxazol	increases connectivity	heterocyclic N-oxide and co-ligand	A*M1	A*B01)2*M1	A*B2*B01)2	0D	1D	1	none	1,2M3-1	2C1
GENBAE	V.I.Ovcharenko,S.V.Fokin,E.T.Kostina,G.V.Romanenko,A.S.Bogomyakov,E.V.Tretyakov INORG.CHEM.,2012,51,12188	bis(\m~2~-(2-(1-Ethyl-3-methyl-1H-pyrazol-4-yl)-4,4,5,5-tetramethyl-3-oxido-4, 5-dihydro-1H-imidazol-1-yl)oxidanylradical-N,O)-hexakis(hexafluoroacetylacetonato-O,O')-tri-copper(ii)bis((2-(1-ethyl-3-methyl-1H-pyrazol-4-yl)-4,4,5,5-tetramethyl-3-oxido-4,5-dihydro-1H-imidazol-1-yl)oxidanylradical-N,O)-bis(hexafluoroacetylacetonato-O,O')-copper(ii).	1:1	2	1	κ1	M1	2	none	pyrazol, acetylacetonato	increases connectivity	heterocyclic N-oxide and co-ligand	A*M1	A)2*B01)4*M1	A)2*B2*B01)4*M1	0D	0D	1	3, 1	1,2M3-1	1,1,2,3,4M11-1|1,4M5-1
GENBAE01	V.I.Ovcharenko,S.V.Fokin,E.T.Kostina,G.V.Romanenko,A.S.Bogomyakov,E.V.Tretyakov INORG.CHEM.,2012,51,12188	bis(\m~2~-(2-(1-Ethyl-3-methyl-1H-pyrazol-4-yl)-4,4,5,5-tetramethyl-3-oxido-4, 5-dihydro-1H-imidazol-1-yl)oxidanylradical-N,O)-hexakis(hexafluoroacetylacetonato-O,O')-tri-copper(ii)bis((2-(1-ethyl-3-methyl-1H-pyrazol-4-yl)-4,4,5,5-tetramethyl-3-oxido-4,5-dihydro-1H-imidazol-1-yl)oxidanylradical-N,O)-bis(hexafluoroacetylacetonato-O,O')-copper(ii).	1:1	2	1	κ1	M1	2	none	pyrazol, acetylacetonato	increases connectivity	heterocyclic N-oxide and co-ligand	A*M1	A)2*B01)4*M1	A)2*B2*B01)4*M1	0D	0D	1	3, 1	1,2M3-1	1,1,2,3,4M11-1|1,4M5-1
GENBIM	V.I.Ovcharenko,S.V.Fokin,E.T.Kostina,G.V.Romanenko,A.S.Bogomyakov,E.V.Tretyakov INORG.CHEM.,2012,51,12188	catena-[bis(\m~2~-(2-(1-Ethyl-3-methyl-1H-pyrazol-4-yl)-4,4,5,5-tetramethyl-3-oxido-4,5-dihydro-1H-imidazol-1-yl)oxidanylradical-N,O)-bis(hexafluoroacetylacetonato-O,O')-di-copper(ii)].	1:1	2	1	κ1	M1	2	none	pyrazol, acetylacetonato	increases connectivity	heterocyclic N-oxide and co-ligand	A*M1	A*B01)2*M1	A*B2*B01)2	0D	1D	1	none	1,2M3-1	2C1
GENBOS	V.I.Ovcharenko,S.V.Fokin,E.T.Kostina,G.V.Romanenko,A.S.Bogomyakov,E.V.Tretyakov INORG.CHEM.,2012,51,12188	bis(\m~2~-(2-(1-Ethyl-3-methyl-1H-pyrazol-4-yl)-4,4,5,5-tetramethyl-3-oxido-4, 5-dihydro-1H-imidazol-1-yl)oxidanylradical-N,O)-hexakis(hexafluoroacetylacetonato-O,O')-tri-copper(ii).	3:2	2	1	κ1	M1	1	none	pyrazol, acetylacetonato	increases connectivity	heterocyclic N-oxide and co-ligand	A)3*M1)2	A)3*B01)6*M1)2	A)3*B2)2*B01)6	0D	0D	1	3	1M2-1	1,1,2,3,4M11-1
GIZRUD	G.V.Romanenko,S.E.Tolstikov,E.V.Tret'yakov,S.V.Fokin,V.N.Ikorskii,V.I.Ovcharenko IZV.AKAD.NAUK SSSR,SER.KHIM.(RUSS.)(RUSS.CHEM.BULL.),2007,1732	catena-((\m~4~-1,6-di(4-(4,4,5,5-tetramethyl-3-oxide-1-oxyl-4,5-dihydro-1H-imidazol-2-yl)-1H-pyrazol-1-yl)hexane-N,N',O,O')-tetrakis(hexafluoroacetylacetonato-O,O')-di-copper(ii)).	2:1	4	2	κ1	B2	2	none	pyrazol, acetylacetonato	increases connectivity	heterocyclic N-oxide and co-ligand	A)2*B2	A)2*B2*B01)4	A)2*K4*B01)4	1D	3D	none	none	2C1	dia; 4/6/c1; sqc6
GORMEF	K.Griesar,W.Haase,I.Svoboda,H.Fuess INORG.CHIM.ACTA,1999,287,181	catena((\m~4~-bis(4-(2,2,6,6-Tetramethyl-piperidyl-1-oxy)terephthalato))-tetrakis(hexafluoro-acetylacetonato)-di-copper(ii)).	2:1	2	2	κ1	B2	2	none	acetylacetonato	increases connectivity	heterocyclic N-oxide and co-ligand	A)2*B2	A)2*B2*B01)4	A)2*K4*B01)4	1D	2D	none	none	2C1	sql
GUJHIC	Bao-Qing Ma,Song Gao,Hao-Ling Sun,Guang-Xian Xu J.CHEM.SOC.,DALTON TRANS.,2001,130	catena-((\m~2~-4,4'-Bipyridine-N,N'-dioxide-O,O')-tetra-aqua-copper(ii)diperchlorate 4,4'-bipyridine-N,N'-dioxide solvate).	1:1	2	2	κ1	B2, 0D	2	none	water	terminal	co-ligand	A*B2	A*M1)4	A*B2*M1)4	1D	1D	none	none	2C1	2C1
HACGEZ	Allao R.A.,Jordao A.K.,Resende J.A.L.C.,Cunha A.C.,Ferreira V.F.,Novak M.A.,Sangregorio C.,Sorace L.,Vaz M.G.F. DALTON TRANS.,2011,40,10843	catena-(bis(\m~2~-4-azido-2,2,6,6-tetramethylpiperidine-1-oxyl)-tetrakis(hexafluoroacetylacetonato)-di-copper).	1:1	1	1	κ1	M1	2	none	acetylacetonato, azido	increases connectivity	heterocyclic N-oxide and co-ligand	A*M1	A*B01)2*M1	A*B2*B01)2	0D	1D	1	none	1,2M3-1	2C1
HEDNAF	A.B.Burdukov,V.I.Ovcharenko,N.V.Pervukhina,V.N.Ikorski POLYHEDRON,1993,12,1705	bis(\m~2~-1,2-Dihydro-2,2-diphenyl-3-oxo-3H-indole-1-oxyl)-hexakis(hexafluoroacetylacetonato)-tri-copper(ii).	3:2	1	1	κ1	M1	1	none	acetylacetonato	increases connectivity	heterocyclic N-oxide and co-ligand	A)3*M1)2	A)3*B01)6*M1)2	A)3*B2)2*B01)6	0D	0D	1	3	1M2-1	1,1,2,3,4M11-1
HEFPIR	A.Caneschi,L.David,F.Ferraro,D.Gatteschi,A.C.Fabretti INORG.CHIM.ACTA,1994,217,7	bis(\m~2~-1,3-bis(1'-Oxyl-3'-oxido-4',4',5',5'-tetramethyl-4,5-dihydro-1H-imidazol-2'-yl)propane)-hexakis(hexafluoroacetylacetonato)-tri-copper(ii).	3:2	4	2	κ1	B2	2, 1	none	acetylacetonato	terminal	co-ligand	A)3*B2)2	A*B01)2	A)3*B2)2*B01)6	0D	0D	3	3	1,2,2M5-1	1,1,2,3,4M11-1
HENZUV	A.B.Burdukov,V.I.Ovcharenko,N.V.Pervukhina,V.N.Ikorskii ZH.NEORG.KHIM.(RUSS.)(RUSS.J.INORG.CHEM.),1993,38,496	catena-((\m~2~-4-Amido-2,2,5,5-tetramethylimidazoline-1-oxyl-O,O')-bis(hexafluoroacetylacetonato-O,O')-copper(ii)).	1:1	1	1	κ1	M1	1	none	acetylacetonato, carbonyl	increases connectivity	heterocyclic N-oxide and co-ligand	A*M1	A*B01)2*M1	A*B2*B01)2	0D	1D	1	none	1M2-1	2C1
HIGXIF	Kai Jiang,Bao-Li Zhao,Li-Ya Wang,Yu-Fang Wang Jiegou Huaxue(Chin.)(Chin.J.Struct.Chem.),2007,26,860	catena-(bis(\m~2~-4,4,5,5-Tetramethylimidazoline-2-yl-(2'-chloro-5'-nitrophenyl)-3-oxide-1-oxyl)-tetrakis(hexafluoroacetylacetonato)-di-copper(ii)).	1:1	2	2	κ1	B2	2	none	acetylacetonato	terminal	co-ligand	A*B2	A*B01)2	A*B2*B01)2	1D	1D	none	none	2C1	2C1
HIRQEG	Ya-Li Wang,Yuan-Yuan Gao,Ming-Fang Yang,Tao Gao,Yue Ma,Qing-Lun Wang,Dai-Zheng Liao POLYHEDRON,2013,61,105	bis(\m~2~-2-(6-methoxypyridin-3-yl)-4,4,5,5-tetramethyl-4,5-dihydro-1H-imidazol-1-olate 3-oxide)-hexakis(1,1,1,5,5,5-hexafluoroacetylacetonato)-tri-copper.	3:2	2	2	κ1	B2	2, 1	none	acetylacetonato	terminal	co-ligand	A)3*B2)2	A*B01)2	A)3*B2)2*B01)6	0D	0D	3	3	1,2,2M5-1	1,1,2,3,4M11-1
HOCGUB	M.G.F.Vaz,L.M.M.Pinheiro,H.O.Stumpf,A.F.C.Alcantara,S.Golhen,L.Ouahab,O.Cador,C.Mathoniere,O.Kahn Chem.-Eur.J.,1999,5,1486	(o-Phenylene-bis(oxamato))-(2-(1-ethylpyridinium-4-yl)-4,4,5,5-tetramethylimidazolin-1-oxyl-3-oxide)-copper2-(1-ethylpyridinium-4-yl)-4,4,5,5-tetramethylimidazolin-1-oxyl-3-oxideacetonitrile solvate monohydrate.	1:1	2	1	κ1	M1, 0D	1	none	o-phenylene-bis(oxamato)	terminal	co-ligand	A*M1	A*K0001	A*K0001*M1	0D	0D	1	1	1M2-1	1,2M3-1
HULVUG	M.V.Fedin,S.L.Veber,G.V.Romanenko,V.I.Ovcharenko,R.Z.Sagdeev,G.Klihm,E.Reijerse,W.Lubitz,E.G.Bagryanskaya PHYS.CHEM.CHEM.PHYS.(PCCP),2009,11,6654	catena-(bis(\m~2~-2-(1-n-Butylpyrazol-4-yl)-4,4,5,5-tetramethylimidazoline-1-oxyl-3-oxide-N,O)-tetrakis(1,1,1,5,5,5-hexafluoroacetylacetonato-O,O')-di-copper(ii) o-xylene solvate).	1:1	2	1	κ1	M1	2	none	pyrazol, acetylacetonato	increases connectivity	heterocyclic N-oxide and co-ligand	A*M1	A*B01)2*M1	A*B2*B01)2	0D	1D	1	none	1,2M3-1	2C1
HULVUG01	M.V.Fedin,S.L.Veber,G.V.Romanenko,V.I.Ovcharenko,R.Z.Sagdeev,G.Klihm,E.Reijerse,W.Lubitz,E.G.Bagryanskaya PHYS.CHEM.CHEM.PHYS.(PCCP),2009,11,6654	catena-(bis(\m~2~-2-(1-n-Butylpyrazol-4-yl)-4,4,5,5-tetramethylimidazoline-1-oxyl-3-oxide-N,O)-tetrakis(1,1,1,5,5,5-hexafluoroacetylacetonato-O,O')-di-copper(ii) o-xylene solvate).	1:1	2	1	κ1	M1	2	none	pyrazol, acetylacetonato	increases connectivity	heterocyclic N-oxide and co-ligand	A*M1	A*B01)2*M1	A*B2*B01)2	0D	1D	1	none	1,2M3-1	2C1
HULVUG02	M.V.Fedin,S.L.Veber,G.V.Romanenko,V.I.Ovcharenko,R.Z.Sagdeev,G.Klihm,E.Reijerse,W.Lubitz,E.G.Bagryanskaya PHYS.CHEM.CHEM.PHYS.(PCCP),2009,11,6654	catena-(bis(\m~2~-2-(1-n-Butylpyrazol-4-yl)-4,4,5,5-tetramethylimidazoline-1-oxyl-3-oxide-N,O)-tetrakis(1,1,1,5,5,5-hexafluoroacetylacetonato-O,O')-di-copper(ii) o-xylene solvate).	1:1	2	1	κ1	M1	2	none	pyrazol, acetylacetonato	increases connectivity	heterocyclic N-oxide and co-ligand	A*M1	A*B01)2*M1	A*B2*B01)2	0D	1D	1	none	1,2M3-1	2C1
HULVUG03	M.V.Fedin,S.L.Veber,G.V.Romanenko,V.I.Ovcharenko,R.Z.Sagdeev,G.Klihm,E.Reijerse,W.Lubitz,E.G.Bagryanskaya PHYS.CHEM.CHEM.PHYS.(PCCP),2009,11,6654	catena-(bis(\m~2~-2-(1-n-Butylpyrazol-4-yl)-4,4,5,5-tetramethylimidazoline-1-oxyl-3-oxide-N,O)-tetrakis(1,1,1,5,5,5-hexafluoroacetylacetonato-O,O')-di-copper(ii) o-xylene solvate).	1:1	2	1	κ1	M1	2	none	pyrazol, acetylacetonato	increases connectivity	heterocyclic N-oxide and co-ligand	A*M1	A*B01)2*M1	A*B2*B01)2	0D	1D	1	none	1,2M3-1	2C1
HULVUG04	M.V.Fedin,S.L.Veber,G.V.Romanenko,V.I.Ovcharenko,R.Z.Sagdeev,G.Klihm,E.Reijerse,W.Lubitz,E.G.Bagryanskaya PHYS.CHEM.CHEM.PHYS.(PCCP),2009,11,6654	catena-(bis(\m~2~-2-(1-n-Butylpyrazol-4-yl)-4,4,5,5-tetramethylimidazoline-1-oxyl-3-oxide-N,O)-tetrakis(1,1,1,5,5,5-hexafluoroacetylacetonato-O,O')-di-copper(ii) o-xylene solvate).	1:1	2	1	κ1	M1	2	none	pyrazol, acetylacetonato	increases connectivity	heterocyclic N-oxide and co-ligand	A*M1	A*B01)2*M1	A*B2*B01)2	0D	1D	1	none	1,2M3-1	2C1
HULVUG05	M.V.Fedin,S.L.Veber,G.V.Romanenko,V.I.Ovcharenko,R.Z.Sagdeev,G.Klihm,E.Reijerse,W.Lubitz,E.G.Bagryanskaya PHYS.CHEM.CHEM.PHYS.(PCCP),2009,11,6654	catena-(bis(\m~2~-2-(1-n-Butylpyrazol-4-yl)-4,4,5,5-tetramethylimidazoline-1-oxyl-3-oxide-N,O)-tetrakis(1,1,1,5,5,5-hexafluoroacetylacetonato-O,O')-di-copper(ii) o-xylene solvate).	1:1	2	1	κ1	M1	2	none	pyrazol, acetylacetonato	increases connectivity	heterocyclic N-oxide and co-ligand	A*M1	A*B01)2*M1	A*B2*B01)2	0D	1D	1	none	1,2M3-1	2C1
HULZOD	S.N.Ivashevskaja,L.A.Aleshina,V.P.Andreev,Y.P.Nizhnik,V.V.Chernyshev ACTA CRYSTALLOGR.,SECT.E:STRUCT.REP.ONLINE,2002,58,m721	bis(\m~2~-Quinoline N-oxide-\k^2^O:O)-bis(dichloro-copper(ii)).	1:1	1	1	κ2	M2	2	2-c N2O2Cu2	chloro	terminal	co-ligand	A*M2	A*M1)2	A*M2*M1)2	0D	0D	2	2	2M4-1	1,2,4M8-3
HUPSOB	Puszko A.,Krojcer A.,Pelczynska M.,Wietrzyk J.,Cieslak-Golonka M.,Jezierska J.,Adach A.,Kubiak M. J.INORG.BIOCHEM.,2010,104,153	trans-Dinitrato-bis(2,6-dimethyl-4-nitropyridine N-oxide)-copper(ii).	1:2	1	1	κ1	M1	2	none	nitrato	terminal	co-ligand	A*M1)2	A*B01)2	A*B01)2*M1)2	0D	0D	1	1	1,2M3-1	1,4M5-1
HUPSUH	Puszko A.,Krojcer A.,Pelczynska M.,Wietrzyk J.,Cieslak-Golonka M.,Jezierska J.,Adach A.,Kubiak M. J.INORG.BIOCHEM.,2010,104,153	Aqua-bis((nitrato-O)-(2,3-dimethyl-4-nitro-1\l^5^-pyridin-1-olato))-copper(ii). Aqua-dinitrato-bis(2,6-dimethyl-4-nitropyridine N-oxide)-copper(ii).	1:2	1	1	κ1	M1	2	none	water, nitrato	terminal	co-ligand	A*M1)2	A*B01*M1)2	A*B01*M1)4	0D	0D	1	1	1,2M3-1	1,5M6-1
IBELAD	O.V.Koreneva,G.V.Romanenko,V.I.Ovcharenko Zh.Strukt.Khim.(Russ.)(J.Struct.Chem.),2004,45,357	(\m~2~-2-(4'-Cyanophenyl)-4,4,5,5-tetramethyl-2-imidazolin-1-oxyl)-tetrakis(hexafluoroacetylacetonato)-di-copper(ii).	2:1	1	1	κ1	M1	1	none	Cyanophenyl, acetylacetonato	increases connectivity	heterocyclic N-oxide and co-ligand	A)2*M1	A)2*B01)4*M1	A)2*B2*B01)4	0D	0D	1	2	1M2-1	1,2,3M7-2
IBELIL	O.V.Koreneva,G.V.Romanenko,V.I.Ovcharenko Zh.Strukt.Khim.(Russ.)(J.Struct.Chem.),2004,45,357	catena-((\m~3~-2-(4'-Cyanophenyl)-4,4,5,5-tetramethyl-2-imidazolin-1-oxyl)-tetrakis(hexafluoroacetylacetonato)-di-copper(ii)).	2:1	1	1	κ1	M1	1	none	acetylacetonato, cyanophenyl	increases connectivity	heterocyclic N-oxide and co-ligand	A)2*M1	A)2*B2*B01)4	A)2*T3*B01)4	0D	1D	1	none	1M2-1	2C1
IBELIL01	O.V.Koreneva,G.V.Romanenko,V.I.Ovcharenko Zh.Strukt.Khim.(Russ.)(J.Struct.Chem.),2004,45,357	catena-((\m~3~-2-(4'-Cyanophenyl)-4,4,5,5-tetramethyl-2-imidazolin-1-oxyl)-tetrakis(hexafluoroacetylacetonato)-di-copper(ii)).	2:1	1	1	κ1	M1	1	none	acetylacetonato, imidazoline	increases connectivity	heterocyclic N-oxide and co-ligand	A)2*M1	A)2*B2*B01)4	A)2*T3*B01)4	0D	1D	1	none	1M2-1	2C1
IBIDAZ	Qi-Hua Zhao,Li-Cun Li,Zong-Hui Jiang,Dai-Zheng Liao,Shi-Ping Yan,Rui-Bin Fang J.Coord.Chem.,2004,57,843	(\m~2~-2,5-Dimethoxy-1,4-bis(4,4,5,5-tetramethyl-2-imidazolin-2-yl-3-oxide)benzene-O,O')-bis(bis(hexafluoroacetylacetonato)-copper(ii)).	2:1	2	2	κ1	B2	1	none	acetylacetonato	increases connectivity	co-ligand	A)2*B2	A*B01)2	A)2*B2*B01)4	0D	0D	1	2	1,2M3-1	1,2,3M7-2
IGEQAO	Ngong Kodiah Beyeh,R.Puttreddy DALTON TRANS.,2015,44,9881	bis(2,8,14,20-tetraethyl-5,11,17,23-tetramethyl-4,6,10,12,16,18,22,24-octahydroxycalix(4)arene) bis(1-oxo-1-pyridine)-dichloro-copper(ii) methanol unknownsolvate. bis(2,8,14,20-tetraethyl-5,11,17,23-tetramethyl-4,6,10,12,16,18,22,24-calix(4)resorcinarene) trans-bis(pyridine N-oxide)-dichloro-copper(ii) methanolunknown solvate.	1:2	1	1	κ1	M1	2	none	chloro	terminal	co-ligand	A*M1)2	A*M1)2	A*M1)4	0D	0D	1	1	1,2M3-1	1,4M5-1
IGUBAO	D.A.Souza,A.S.Florencio,S.Soriano,R.Calvo,R.P.Sartoris,J.W.de M.Carneiro,C.Sangregorio,M.A.Novak,M.G.F.Vaz DALTON TRANS.,2009,6816	catena(bis(\m~2~-4-Pyridyl-4,4,5,5-tetramethylimidazoline-1-oxy-3-oxide)-tetrakis(4,4,4-trifluoro-1-phenylbutane-1,3-dionato)-di-copper(ii)).	1:1	2	1	κ1	M1	2	none	acetylacetonato, pyridyl	increases connectivity	heterocyclic N-oxide and co-ligand	A*M1	A*B01)2*M1	A*B2*B01)2	0D	1D	1	none	1,2M3-1	2C1
IVOZIF	Xiaodong Shi,Kai Zhao,Ying He,Chuan Shan,Junyu Ren,Yu Yan,Hanzhong Shi,Haonan Wang,L.Wojitas,Zhiguang Song Magnetochem.,2019,5,41	bis(dicyanamido)-bis(4-methoxy-1-oxopyridine)-copper.	1:2	1	1	κ1	M1	2	none	dicyanamid	terminal	co-ligand	A*M1)2	A*M1)2	A*M1)4	0D	0D	1	1	1,2M3-1	1,4M5-1
IWUYUU	V.B.Rybakov,T.A.Semenova,L.A.Aleshina,V.P.Andreev,Y.P.Nizhnik,V.V.Chernyshev ACTA CRYSTALLOGR.,SECT.E:STRUCT.REP.ONLINE,2004,60,m901	trans-Dichloro-bis(2-methylquinoline N-oxide-O)-copper(ii).	1:2	1	1	κ1	M1	2	none	chloro	terminal	co-ligand	A*M1)2	A*M1)2	A*M1)4	0D	0D	1	1	1,2M3-1	1,4M5-1
IXUYIM	Yan-Li Gao,Pingqiang Gao,Ying Gong,Guoyu Ren J.CHEM.RES.,2021,45,590	(1,3-bis(1'-oxyl-3'-oxido-4',4', 5', 5'-tetramethyl-4,5-dihydro-1H-imidazol-2-y1)-benzene)-bis(1,1,1,5,5,5-hexafluoroacetylacetonato)-copper(ii).	1:1	4	2	κ1	B01	2	none	acetylacetonato	terminal	co-ligand	A*B01	A*B01)2	A*B01)3	0D	0D	1	1	1M2-1	1,3M4-1
IZULEW	N.A.Artiukhova,G.V.Romanenko,A.S.Bogomyakov,I.Yu.Barskaya,S.L.Veber,M.V.Fedin,K.Yu.Maryunina,K.Inoue,V.I.Ovcharenko J.Mater.Chem.C,2016,4,11157	catena-[(\m-(12-(1-ethyl-1H-pyrazol-4-yl)-11-oxo-11,13-diazadispiro[4.0.4^6^.3^5^]tridec-11-en-13-yl)oxidanylradical)-bis(1,1,1,5,5,5-hexafluoroacetylacetonato)-copper].	1:1	2	1	κ1	M1	1	none	acetylacetonato, pyrazol	increases connectivity	heterocyclic N-oxide and co-ligand	A*M1	A*B01)2*M1	A*B2*B01)2	0D	1D	1	none	1M2-1	2C1
IZULEW01	N.A.Artiukhova,G.V.Romanenko,A.S.Bogomyakov,I.Yu.Barskaya,S.L.Veber,M.V.Fedin,K.Yu.Maryunina,K.Inoue,V.I.Ovcharenko J.Mater.Chem.C,2016,4,11157	catena-[(\m-(12-(1-ethyl-1H-pyrazol-4-yl)-11-oxo-11,13-diazadispiro[4.0.4^6^.3^5^]tridec-11-en-13-yl)oxidanylradical)-bis(1,1,1,5,5,5-hexafluoroacetylacetonato)-copper].	1:1	2	1	κ1	M1	1	none	acetylacetonato, pyrazol	increases connectivity	heterocyclic N-oxide and co-ligand	A*M1	A*B01)2*M1	A*B2*B01)2	0D	1D	1	none	1M2-1	2C1
IZULEW02	N.A.Artiukhova,G.V.Romanenko,A.S.Bogomyakov,I.Yu.Barskaya,S.L.Veber,M.V.Fedin,K.Yu.Maryunina,K.Inoue,V.I.Ovcharenko J.Mater.Chem.C,2016,4,11157	catena-[(\m-(12-(1-ethyl-1H-pyrazol-4-yl)-11-oxo-11,13-diazadispiro[4.0.4^6^.3^5^]tridec-11-en-13-yl)oxidanylradical)-bis(1,1,1,5,5,5-hexafluoroacetylacetonato)-copper].	1:1	2	1	κ1	M1	1	none	pyrazol, acetylacetonato	increases connectivity	heterocyclic N-oxide and co-ligand	A*M1	A*B01)2*M1	A*B2*B01)2	0D	1D	1	none	1M2-1	2C1
IZULEW03	N.A.Artiukhova,G.V.Romanenko,A.S.Bogomyakov,I.Yu.Barskaya,S.L.Veber,M.V.Fedin,K.Yu.Maryunina,K.Inoue,V.I.Ovcharenko J.Mater.Chem.C,2016,4,11157	catena-[(\m-(12-(1-ethyl-1H-pyrazol-4-yl)-11-oxo-11,13-diazadispiro[4.0.4^6^.3^5^]tridec-11-en-13-yl)oxidanylradical)-bis(1,1,1,5,5,5-hexafluoroacetylacetonato)-copper].	1:1	2	1	κ1	M1	1	none	pyrazol, acetylacetonato	increases connectivity	heterocyclic N-oxide and co-ligand	A*M1	A*B01)2*M1	A*B2*B01)2	0D	1D	1	none	1M2-1	2C1
IZUMAT	N.A.Artiukhova,G.V.Romanenko,A.S.Bogomyakov,I.Yu.Barskaya,S.L.Veber,M.V.Fedin,K.Yu.Maryunina,K.Inoue,V.I.Ovcharenko J.Mater.Chem.C,2016,4,11157	catena-[bis(\m-(12-(1-ethyl-1H-pyrazol-4-yl)-11-oxo-11,13-diazadispiro[4.0.4^6^.3^5^]tridec-11-en-13-yl)oxidanylradical)-tetrakis(1,1,1,5,5,5-hexafluoroacetylacetonato)-di-copper(ii)].	1:1	2	1	κ1	M1	2	none	pyrazol, acetylacetonato	increases connectivity	heterocyclic N-oxide and co-ligand	A*M1	A*B01)2*M1	A*B2*B01)2	0D	1D	1	none	1,2M3-1	2C1
JAGSES	P.A.Goddard,J.L.Manson,John Singleton,I.Franke,T.Lancaster,A.J.Steele,S.J.Blundell,C.Baines,F.L.Pratt,R.D.McDonald,O.E.Ayala-Valenzuela,J.F.Corbey,H.I.Southerland,Pinaki Sengupta,J.A.Schlueter Phys.Rev.Lett.,2012,108,77208	catena-[(\m-pyrazine)-diaqua-bis(pyridine N-oxide)-copper(ii)bis(hexafluorophosphate)].	1:2	1	1	κ1	M1	2	none	pyrazine, water	increases connectivity	co-ligand	A*M1)2	A*B2*M1)2	A*B2*M1)4	0D	1D	1	none	1,2M3-1	2C1
JAGSIW	P.A.Goddard,J.L.Manson,John Singleton,I.Franke,T.Lancaster,A.J.Steele,S.J.Blundell,C.Baines,F.L.Pratt,R.D.McDonald,O.E.Ayala-Valenzuela,J.F.Corbey,H.I.Southerland,Pinaki Sengupta,J.A.Schlueter Phys.Rev.Lett.,2012,108,77208	catena-[bis(\m-pyrazine)-bis(pyridine N-oxide)-copperbis(hexafluorophosphate)].	1:2	1	1	κ1	M1	2	none	pyrazine	increases connectivity	co-ligand	A*M1)2	A*B2)2	A*B2)2*M1)2	0D	2D	1	none	1,2M3-1	sql
JAXGIY	Chan-Cheng Su,Ru-Yu Chen,Sue-Lein Wang TRANSITION MET.CHEM.,1988,13,375	bis((1-Methylimidazolyl-N)-perchlorato-(pyridine N-oxide))-copper(ii).	1:2	1	1	κ1	M1	2	none	imidazole	terminal	co-ligand	A*M1)2	A*M1)4	A*M1)6	0D	0D	1	1	1,2M3-1	1,6M7-1
JAZYUF	E.Fursova,O.Kuznetsova,G.Romanenko,Yu.Schvedenkov,V.I.Ovcharenko J.CLUSTER SCI.,2005,16,319	tetrakis(\m~2~-Pivalato)-bis(2,4,4,5,5-pentamethyl-4,5-dihydro-1H-imidazol-1-oxy-3-oxide)-di-copper(ii).	1:1	2	1	κ1	M1	1	none	carboxylate	increases connectivity	co-ligand	A*M1	A*B2)2	A*B2)2*M1	0D	0D	1	2	1M2-1	1,2,5M8-2
JEFVAS	E.Tretyakov,S.Fokin,G.Romanenko,V.Ikorskii,S.Vasilevsky,V.Ovcharenko INORG.CHEM.,2006,45,3671	catena-((\m~4~-1,8-bis(4-(4,4,5,5-Tetramethyl-3-oxide-1-oxyl-4,5-dihydro-1H-imidazol-2-yl)pyrazol-1-yl)octane-N,N',O,O')-tetrakis(1,1,1,5,5,5-hexafluoroacetylacetonato-O,O')-di-copper).	2:1	4	2	κ1	B2	2	none	acetylacetonato, pyrazol	increases connectivity	heterocyclic N-oxide and co-ligand	A)2*B2	A)2*B2*B01)4	A)2*K4*B01)4	1D	2D	none	none	2C1	sql
JEFVUM	E.Tretyakov,S.Fokin,G.Romanenko,V.Ikorskii,S.Vasilevsky,V.Ovcharenko INORG.CHEM.,2006,45,3671	catena-((P)-(\m~4~-1,4-bis(4-(4,4,5,5-Tetramethyl-3-oxide-1-oxyl-4,5-dihydro-1H-imidazol-2-yl)pyrazol-1-yl)butane-N,N',O,O')-tetrakis(1,1,1,5,5,5-hexafluoroacetylacetonato-O,O')-di-copper).	2:1	4	2	κ1	B2	1	none	acetylacetonato, pyrazol	increases connectivity	heterocyclic N-oxide and co-ligand	A)2*B2	A)2*B2*B01)4	A)2*K4*B01)4	0D	3D	2	none	1,2M3-1	dia; 4/6/c1; sqc6
JEFVUM01	E.Tretyakov,S.Fokin,G.Romanenko,V.Ikorskii,S.Vasilevsky,V.Ovcharenko INORG.CHEM.,2006,45,3671	catena-((P)-(\m~4~-1,4-bis(4-(4,4,5,5-Tetramethyl-3-oxide-1-oxyl-4,5-dihydro-1H-imidazol-2-yl)pyrazol-1-yl)butane-N,N',O,O')-tetrakis(1,1,1,5,5,5-hexafluoroacetylacetonato-O,O')-di-copper).	2:1	4	2	κ1	B2	1	none	acetylacetonato, pyrazol	increases connectivity	heterocyclic N-oxide and co-ligand	A)2*B2	A)2*B2*B01)4	A)2*K4*B01)4	0D	3D	2	none	1,2M3-1	dia; 4/6/c1; sqc6
JEFVUM02	E.Tretyakov,S.Fokin,G.Romanenko,V.Ikorskii,S.Vasilevsky,V.Ovcharenko INORG.CHEM.,2006,45,3671	catena-((P)-(\m~4~-1,4-bis(4-(4,4,5,5-Tetramethyl-3-oxide-1-oxyl-4,5-dihydro-1H-imidazol-2-yl)pyrazol-1-yl)butane-N,N',O,O')-tetrakis(1,1,1,5,5,5-hexafluoroacetylacetonato-O,O')-di-copper).	2:1	4	2	κ1	B2	1	none	acetylacetonato, pyrazol	increases connectivity	heterocyclic N-oxide and co-ligand	A)2*B2	A)2*B2*B01)4	A)2*K4*B01)4	0D	3D	2	none	1,2M3-1	dia; 4/6/c1; sqc6
JESDIU	C.I.Cabello,A.Caneschi,R.L.Carlin,D.Gatteschi,P.Rey,R.Sessoli INORG.CHEM.,1990,29,2582	catena(bis(Hexafluoroacetylacetonato)-(\m~2~-2-isopropyl-4,4,5,5-tetramethyl-4,5-dihydro-1H-imidazolyl-1-oxyl 3-oxide)-di-copper(ii)).	1:1	2	2	κ1	B2	2	none	acetylacetonato	terminal	co-ligand	A*B2	A*B01)2	A*B2*B01)2	1D	1D	none	none	2C1	2C1
JEYPUZ	J.-M.Shi,X.Zhang,C.-J.Wu,L.-D.Liu POL.J.CHEM.,2006,80,2063	catena-(tetrakis(\m~2~-2,5-Dimethylpyrazine-1,4-dioxide)-diaqua-bis(perchlorato)-di-copper(ii) diperchlorate tetrahydrate).	1:2	2	2	κ1	B2	4	none	water, perchlorato	terminal	co-ligand	A*B2)2	A*M1)2	A*B2)2*M1)2	2D	2D	none	none	2,4L2(sql)	sql
JICSAS	Meng Yang CSD Communication(Private Communication),2018,	catena-[tetrakis(\m-2-(5-(1H-imidazol-1-yl)pyridin-3-yl)-4,4,5,5-tetramethylimidazoline-1-oxyl-3-oxideradical)-octakis(hexafluoroacetylacetonato)-tetra-copper(ii)].	1:1	2	1	κ1	M1	1	none	imidazole, acetylacetonato	increases connectivity	heterocyclic N-oxide and co-ligand	A*M1	A*B01)2*M1	A*B2*B01)2	0D	1D	1	none	1M2-1	2C1
JIRHIC	V.I.Ovcharenko,S.V.Fokin,G.V.Romanenko,E.V.Tret'yakov,N.S.Boltacheva,V.I.Filyakova,V.N.Charushin IZV.AKAD.NAUK SSSR,SER.KHIM.(RUSS.)(RUSS.CHEM.BULL.),2006,2043	(2-(1-Methyl-1H-pyrazol-4-yl)-4,4,5,5-tetramethyl-4,5-dihydro-1H-imidazol-3-oxide-1-oxyl)-bis(1,1,1,5,5,5-hexafluoro-4-iminopent-2-ene-2-olato)-copper(ii).	1:1	2	1	κ1	M1	1	none	4-iminopent-2-ene-2-olato	terminal	co-ligand	A*M1	A*B01)2	A*B01)2*M1	0D	0D	1	1	1M2-1	1,3M4-1
JOGKEV	J.Laugier,J.-M.Latour,A.Caneschi,P.Rey INORG.CHEM.,1991,30,4474	bis((\m~2~-Chloro)-(2,2,6,6-piperidinoxo-O)-copper(ii)).	1:1	1	1	κ1	M1	1	none	chloro	increases connectivity	co-ligand	A*M1	A*M2*M1	A*M2*M1)2	0D	0D	1	2	1M2-1	1,2,4M8-3
KEKXAZ	Aoyama T.,Yamanaka M.,Ohba S.,Saito Y. ACTA CRYSTALLOGR.,SECT.C:CRYST.STRUCT.COMMUN.,1990,46,762	Dinitrato-bis(4-nitropyridine N-oxide-O)-copper(ii).	1:2	1	1	κ1	M1	2	none	nitrato	increases connectivity	co-ligand	A*M1)2	A*B2*B01	A*B2*B01*M1)2	0D	1D	1	none	1,2M3-1	2C1
KIDZUV	Mei Zhu,Dingshuo Lou,Xiaochun Deng,Li Zhang,Wei Zhang,Yaohong Lu CRYSTENGCOMM,2018,20,2583	bis(\m-2-(4-(3-pyridinylmethoxy)phenyl)-4,4,5,5-tetramethyl-imidazolyl-1-oxyl-3-oxide radical)-octakis(hexafluoroacetylacetonato)-tetra-copper(ii).	2:1	2	2	κ1	B2	1	none	pyridin, acetylacetonato	increases connectivity	heterocyclic N-oxide and co-ligand	A)2*B2	A)2*B01)4*M1	A)2*T3*B01)4	0D	0D	1	4	1,2M3-1	1,1,3,3,4M14-1
KIPBAM	D.Luneau,P.Rey,J.Laugier,P.Fries,A.Caneschi,D.Gatteschi,R.Sessoli J.AM.CHEM.SOC.,1991,113,1245	bis(\m~2~-1,3-(2-Phenyl-4,4,5,5-tetramethyl-4,5-dihydro-1H-imidazolyl-1-oxy))-hexakis(hexafluoroacetylacetonato)-tri-copper(ii).	3:1	1	1	κ1	M1	2	none	acetylacetonato, imidazoline	increases connectivity	heterocyclic N-oxide and co-ligand	A)3*M1)2	A)3*B01)6*M1)2	A)3*B2)2*B01)6	0D	0D	1	3	1,2M3-1	1,1,2,3,4M11-1
KIQTIP	S.V.Fokin,E.T.Kostina,E.V.Tretyakov,G.V.Romanenko,A.S.Bogomyakov,R.Z.Sagdeev,V.I.Ovcharenko IZV.AKAD.NAUK SSSR,SER.KHIM.(RUSS.)(RUSS.CHEM.BULL.),2013,660	catena-[bis(\m~2~-2-butyl-3-(4,4,5,5-tetramethyl-1,3-dioxidoimidazolidin-2-ylidene)-2,3-dihydro-1H-pyrazol-1-yl)-tetrakis(1,1,1,5,5,5-hexafluoroacetylacetonato)-di-copper].	1:1	2	1	κ1	M1	2	none	acetylacetonato, pyrazol	increases connectivity	heterocyclic N-oxide and co-ligand	A*M1	A*B01)2*M1	A*B2*B01)2	0D	1D	1	none	1,2M3-1	2C1
KIQTIP01	S.V.Fokin,E.T.Kostina,E.V.Tretyakov,G.V.Romanenko,A.S.Bogomyakov,R.Z.Sagdeev,V.I.Ovcharenko IZV.AKAD.NAUK SSSR,SER.KHIM.(RUSS.)(RUSS.CHEM.BULL.),2013,660	catena-[(\m~2~-2-butyl-3-(4,4,5,5-tetramethyl-1,3-dioxidoimidazolidin-2-ylidene)-2,3-dihydro-1H-pyrazol-1-yl)-bis(1,1,1,5,5,5-hexafluoroacetylacetonato)-copper].	1:1	2	1	κ1	M1	1	none	acetylacetonato, pyrazol	increases connectivity	heterocyclic N-oxide and co-ligand	A*M1	A*B01)2*M1	A*B2*B01)2	0D	1D	1	none	1M2-1	2C1
KIQTUB	S.V.Fokin,E.T.Kostina,E.V.Tretyakov,G.V.Romanenko,A.S.Bogomyakov,R.Z.Sagdeev,V.I.Ovcharenko IZV.AKAD.NAUK SSSR,SER.KHIM.(RUSS.)(RUSS.CHEM.BULL.),2013,660	catena-[tetrakis(\m~2~-2-ethyl-3-(4,4,5,5-tetramethyl-1,3-dioxidoimidazolidin-2-ylidene)-2,3-dihydro-1H-pyrazol-1-yl)-octakis(1,1,1,5,5,5-hexafluoroacetylacetonato)-tetra-copper].	1:1	2	1	κ1	M1	2	none	pyrazol, acetylacetonato	increases connectivity	heterocyclic N-oxide and co-ligand	A*M1	A*B01)2*M1	A*B2*B01)2	0D	1D	1	none	1,2M3-1	2C1
KIQVAJ	S.V.Fokin,E.T.Kostina,E.V.Tretyakov,G.V.Romanenko,A.S.Bogomyakov,R.Z.Sagdeev,V.I.Ovcharenko IZV.AKAD.NAUK SSSR,SER.KHIM.(RUSS.)(RUSS.CHEM.BULL.),2013,660	catena-[tetrakis(\m~2~-2-methyl-3-(4,4,5,5-tetramethyl-1,3-dioxidoimidazolidin-2-ylidene)-2,3-dihydro-1H-pyrazol-1-yl)-octakis(1,1,1,5,5,5-hexafluoroacetylacetonato)-tetra-copper].	1:1	2	1	κ1	M1	2	none	pyrazol, acetylacetonato	increases connectivity	heterocyclic N-oxide and co-ligand	A*M1	A*B01)2*M1	A*B2*B01)2	0D	1D	1	none	1,2M3-1	2C1
KIQVAJ01	S.V.Fokin,E.T.Kostina,E.V.Tretyakov,G.V.Romanenko,A.S.Bogomyakov,R.Z.Sagdeev,V.I.Ovcharenko IZV.AKAD.NAUK SSSR,SER.KHIM.(RUSS.)(RUSS.CHEM.BULL.),2013,660	catena-[tetrakis(\m~2~-2-methyl-3-(4,4,5,5-tetramethyl-1,3-dioxidoimidazolidin-2-ylidene)-2,3-dihydro-1H-pyrazol-1-yl)-octakis(1,1,1,5,5,5-hexafluoroacetylacetonato)-tetra-copper].	1:1	2	1	κ1	M1	2	none	pyrazol, acetylacetonato	increases connectivity	heterocyclic N-oxide and co-ligand	A*M1	A*B01)2*M1	A*B2*B01)2	0D	1D	1	none	1,2M3-1	2C1
KIQVAJ02	S.V.Fokin,E.T.Kostina,E.V.Tretyakov,G.V.Romanenko,A.S.Bogomyakov,R.Z.Sagdeev,V.I.Ovcharenko IZV.AKAD.NAUK SSSR,SER.KHIM.(RUSS.)(RUSS.CHEM.BULL.),2013,660	catena-[tetrakis(\m~2~-2-methyl-3-(4,4,5,5-tetramethyl-1,3-dioxidoimidazolidin-2-ylidene)-2,3-dihydro-1H-pyrazol-1-yl)-octakis(1,1,1,5,5,5-hexafluoroacetylacetonato)-tetra-copper].	1:1	2	1	κ1	M1	2	none	pyrazol, acetylacetonato	increases connectivity	heterocyclic N-oxide and co-ligand	A*M1	A*B01)2*M1	A*B2*B01)2	0D	1D	1	none	1,2M3-1	2C1
KIQVOX	S.V.Fokin,E.T.Kostina,E.V.Tretyakov,G.V.Romanenko,A.S.Bogomyakov,R.Z.Sagdeev,V.I.Ovcharenko IZV.AKAD.NAUK SSSR,SER.KHIM.(RUSS.)(RUSS.CHEM.BULL.),2013,660	catena-[bis(\m~2~-2-ethyl-3-(4,4,5,5-tetramethyl-1,3-dioxidoimidazolidin-2-ylidene)-2,3-dihydro-1H-pyrazol-1-yl)-tetrakis(1,1,1,5,5,5-hexafluoroacetylacetonato)-di-copper].	1:1	2	1	κ1	M1	2	none	pyrazol, acetylacetonato	increases connectivity	heterocyclic N-oxide and co-ligand	A*M1	A*B01)2*M1	A*B2*B01)2	0D	1D	1	none	1,2M3-1	2C1
KIQVOX01	S.V.Fokin,E.T.Kostina,E.V.Tretyakov,G.V.Romanenko,A.S.Bogomyakov,R.Z.Sagdeev,V.I.Ovcharenko IZV.AKAD.NAUK SSSR,SER.KHIM.(RUSS.)(RUSS.CHEM.BULL.),2013,660	catena-[(\m~2~-2-ethyl-3-(4,4,5,5-tetramethyl-1,3-dioxidoimidazolidin-2-ylidene)-2,3-dihydro-1H-pyrazol-1-yl)-bis(1,1,1,5,5,5-hexafluoroacetylacetonato)-copper].	1:1	2	1	κ1	M1	1	none	acetylacetonato, pyrazol	increases connectivity	heterocyclic N-oxide and co-ligand	A*M1	A*B01)2*M1	A*B2*B01)2	0D	1D	1	none	1M2-1	2C1
KITWUH	K.Yu.Maryunina,G.V.Romanenko,E.M.Zueva,S.V.Fokin,A.S.Bogomyakov,V.I.Ovcharenko IZV.AKAD.NAUK SSSR,SER.KHIM.(RUSS.)(RUSS.CHEM.BULL.),2013,2337	catena-(bis(\m~2~-4,4,5,5-Tetramethyl-2-(1-(prop-2-en-1-yl)-1H-pyrazol-4-yl)-4,5-dihydro-1H-imidazol-1-olate3-oxide)-tetrakis(hexafluoroacetylacetonato)-di-copper).	1:1	2	1	κ1	M1	2	none	pyrazol, acetylacetonato	increases connectivity	heterocyclic N-oxide and co-ligand	A*M1	A*B01)2*M1	A*B2*B01)2	0D	1D	1	none	1,2M3-1	2C1
KITWUH01	K.Yu.Maryunina,G.V.Romanenko,E.M.Zueva,S.V.Fokin,A.S.Bogomyakov,V.I.Ovcharenko IZV.AKAD.NAUK SSSR,SER.KHIM.(RUSS.)(RUSS.CHEM.BULL.),2013,2337	catena-(bis(\m~2~-4,4,5,5-Tetramethyl-2-(1-(prop-2-en-1-yl)-1H-pyrazol-4-yl)-4,5-dihydro-1H-imidazol-1-olate3-oxide)-tetrakis(hexafluoroacetylacetonato)-di-copper).	1:1	2	1	κ1	M1	2	none	pyrazol, acetylacetonato	increases connectivity	heterocyclic N-oxide and co-ligand	A*M1	A*B01)2*M1	A*B2*B01)2	0D	1D	1	none	1,2M3-1	2C1
KITWUH02	K.Yu.Maryunina,G.V.Romanenko,E.M.Zueva,S.V.Fokin,A.S.Bogomyakov,V.I.Ovcharenko IZV.AKAD.NAUK SSSR,SER.KHIM.(RUSS.)(RUSS.CHEM.BULL.),2013,2337	catena-(bis(\m~2~-4,4,5,5-Tetramethyl-2-(1-(prop-2-en-1-yl)-1H-pyrazol-4-yl)-4,5-dihydro-1H-imidazol-1-olate3-oxide)-tetrakis(hexafluoroacetylacetonato)-di-copper).	1:1	2	1	κ1	M1	2	none	pyrazol, acetylacetonato	increases connectivity	heterocyclic N-oxide and co-ligand	A*M1	A*B01)2*M1	A*B2*B01)2	0D	1D	1	none	1,2M3-1	2C1
KITWUH03	K.Yu.Maryunina,G.V.Romanenko,E.M.Zueva,S.V.Fokin,A.S.Bogomyakov,V.I.Ovcharenko IZV.AKAD.NAUK SSSR,SER.KHIM.(RUSS.)(RUSS.CHEM.BULL.),2013,2337	catena-(bis(\m~2~-4,4,5,5-Tetramethyl-2-(1-(prop-2-en-1-yl)-1H-pyrazol-4-yl)-4,5-dihydro-1H-imidazol-1-olate3-oxide)-tetrakis(hexafluoroacetylacetonato)-di-copper).	1:1	2	1	κ1	M1	2	none	pyrazol, acetylacetonato	increases connectivity	heterocyclic N-oxide and co-ligand	A*M1	A*B01)2*M1	A*B2*B01)2	0D	1D	1	none	1,2M3-1	2C1
KITWUH04	K.Yu.Maryunina,G.V.Romanenko,E.M.Zueva,S.V.Fokin,A.S.Bogomyakov,V.I.Ovcharenko IZV.AKAD.NAUK SSSR,SER.KHIM.(RUSS.)(RUSS.CHEM.BULL.),2013,2337	catena-(bis(\m~2~-4,4,5,5-Tetramethyl-2-(1-(prop-2-en-1-yl)-1H-pyrazol-4-yl)-4,5-dihydro-1H-imidazol-1-olate3-oxide)-tetrakis(hexafluoroacetylacetonato)-di-copper).	1:1	2	1	κ1	M1	2	none	pyrazol, acetylacetonato	increases connectivity	heterocyclic N-oxide and co-ligand	A*M1	A*B01)2*M1	A*B2*B01)2	0D	1D	1	none	1,2M3-1	2C1
KITWUH05	K.Yu.Maryunina,G.V.Romanenko,E.M.Zueva,S.V.Fokin,A.S.Bogomyakov,V.I.Ovcharenko IZV.AKAD.NAUK SSSR,SER.KHIM.(RUSS.)(RUSS.CHEM.BULL.),2013,2337	catena-(bis(\m-2-(1-allyl-1H-pyrazol-4-yl)-4,4,5,5-tetramethyl-4,5-dihydroimidazole-3-oxide-1-oxyl)-tetrakis(hexafluoroacetylacetonato)-di-copper(ii)).	1:1	2	1	κ1	M1	2	none	pyrazol, acetylacetonato	increases connectivity	heterocyclic N-oxide and co-ligand	A*M1	A*B01)2*M1	A*B2*B01)2	0D	1D	1	none	1,2M3-1	2C1
KITWUH06	G.V.Romanenko,G.A.Letyagin,K.Yu.Maryunina,A.S.Bogomyakov,S.Nishihara,K.Inoue,V.I.Ovcharenkoalina Romanenko CSD Communication(Private Communication),2020,	catena-(bis((\m~2~-2-(1-allylpyrazol-4-yl)-4,4,5,5-tetramethylimidazoline-3-oxide-1-oxyl-N',O)-bis(hexafluoroacetylacetonato-O,O')-copper(ii))).	1:1	2	1	κ1	M1	2	none	pyrazol, acetylacetonato	increases connectivity	heterocyclic N-oxide and co-ligand	A*M1	A*B01)2*M1	A*B2*B01)2	0D	1D	1	none	1,2M3-1	2C1
KITWUH07	G.V.Romanenko,G.A.Letyagin,K.Yu.Maryunina,A.S.Bogomyakov,S.Nishihara,K.Inoue,V.I.Ovcharenkoalina Romanenko CSD Communication(Private Communication),2020,	catena-(bis((\m~2~-2-(1-allylpyrazol-4-yl)-4,4,5,5-tetramethylimidazoline-3-oxide-1-oxyl-N',O)-bis(hexafluoroacetylacetonato-O,O')-copper(ii))).	1:1	2	1	κ1	M1	2	none	pyrazol, acetylacetonato	increases connectivity	heterocyclic N-oxide and co-ligand	A*M1	A*B01)2*M1	A*B2*B01)2	0D	1D	1	none	1,2M3-1	2C1
KITWUH08	G.V.Romanenko,G.A.Letyagin,K.Yu.Maryunina,A.S.Bogomyakov,S.Nishihara,K.Inoue,V.I.Ovcharenkoalina Romanenko CSD Communication(Private Communication),2020,	catena-(bis((\m~2~-2-(1-allylpyrazol-4-yl)-4,4,5,5-tetramethylimidazoline-3-oxide-1-oxyl-N',O)-bis(hexafluoroacetylacetonato-O,O')-copper(ii))).	1:1	2	1	κ1	M1	2	none	pyrazol, acetylacetonato	increases connectivity	heterocyclic N-oxide and co-ligand	A*M1	A*B01)2*M1	A*B2*B01)2	0D	1D	1	none	1,2M3-1	2C1
KITWUH09	G.V.Romanenko,G.A.Letyagin,K.Yu.Maryunina,A.S.Bogomyakov,S.Nishihara,K.Inoue,V.I.Ovcharenkoalina Romanenko CSD Communication(Private Communication),2020,	catena-[bis(\m-{4,4,5,5-tetramethyl-3-oxo-2-[1-(prop-2-en-1-yl)-1H-pyrazol-4-yl]-4,5-dihydro-1H-imidazol-1-yl}oxidanylradical)-tetrakis(1,1,1,5,5,5-hexafluoroacetylacetonato)-di-copper].	1:1	2	1	κ1	M1	2	none	pyrazol, acetylacetonato	increases connectivity	heterocyclic N-oxide and co-ligand	A*M1	A*B01)2*M1	A*B2*B01)2	0D	1D	1	none	1,2M3-1	2C1
KITWUH10	G.V.Romanenko,G.A.Letyagin,K.Yu.Maryunina,A.S.Bogomyakov,S.Nishihara,K.Inoue,V.I.Ovcharenkoalina Romanenko CSD Communication(Private Communication),2020,	catena-[bis(\m-{4,4,5,5-tetramethyl-3-oxo-2-[1-(prop-2-en-1-yl)-1H-pyrazol-4-yl]-4,5-dihydro-1H-imidazol-1-yl}oxidanylradical)-tetrakis(1,1,1,5,5,5-hexafluoroacetylacetonato)-di-copper].	1:1	2	1	κ1	M1	2	none	pyrazol, acetylacetonato	increases connectivity	heterocyclic N-oxide and co-ligand	A*M1	A*B01)2*M1	A*B2*B01)2	0D	1D	1	none	1,2M3-1	2C1
KITWUH11	G.V.Romanenko,G.A.Letyagin,K.Yu.Maryunina,A.S.Bogomyakov,S.Nishihara,K.Inoue,V.I.Ovcharenkoalina Romanenko CSD Communication(Private Communication),2020,	catena-[bis(\m-{4,4,5,5-tetramethyl-3-oxo-2-[1-(prop-2-en-1-yl)-1H-pyrazol-4-yl]-4,5-dihydro-1H-imidazol-1-yl}oxidanylradical)-tetrakis(1,1,1,5,5,5-hexafluoroacetylacetonato)-di-copper].	1:1	2	1	κ1	M1	2	none	pyrazol, acetylacetonato	increases connectivity	heterocyclic N-oxide and co-ligand	A*M1	A*B01)2*M1	A*B2*B01)2	0D	1D	1	none	1,2M3-1	2C1
KITWUH12	G.V.Romanenko,G.A.Letyagin,K.Yu.Maryunina,A.S.Bogomyakov,S.Nishihara,K.Inoue,V.I.Ovcharenkoalina Romanenko CSD Communication(Private Communication),2020,	catena-[bis(\m-{4,4,5,5-tetramethyl-3-oxo-2-[1-(prop-2-en-1-yl)-1H-pyrazol-4-yl]-4,5-dihydro-1H-imidazol-1-yl}oxidanylradical)-tetrakis(1,1,1,5,5,5-hexafluoroacetylacetonato)-di-copper].	1:1	2	1	κ1	M1	2	none	pyrazol, acetylacetonato	increases connectivity	heterocyclic N-oxide and co-ligand	A*M1	A*B01)2*M1	A*B2*B01)2	0D	1D	1	none	1,2M3-1	2C1
KITYAP01	K.Yu.Maryunina,G.V.Romanenko,E.M.Zueva,S.V.Fokin,A.S.Bogomyakov,V.I.Ovcharenko IZV.AKAD.NAUK SSSR,SER.KHIM.(RUSS.)(RUSS.CHEM.BULL.),2013,2337	catena-(tetrakis(\m-2-(1-butyl-1H-pyrazol-4-yl)-4,4,5,5-tetramethyl-4,5-dihydroimidazole-3-oxide-1-oxyl)-octakis(hexafluoroacetylacetonato)-tetra-copper(ii)t-butylbenzene solvate).	1:1	2	1	κ1	M1	2	none	pyrazol, acetylacetonato	increases connectivity	heterocyclic N-oxide and co-ligand	A*M1	A*B01)2*M1	A*B2*B01)2	0D	1D	1	none	1,2M3-1	2C1
KITYAP02	K.Yu.Maryunina,G.V.Romanenko,E.M.Zueva,S.V.Fokin,A.S.Bogomyakov,V.I.Ovcharenko IZV.AKAD.NAUK SSSR,SER.KHIM.(RUSS.)(RUSS.CHEM.BULL.),2013,2337	catena-(tetrakis(\m-2-(1-butyl-1H-pyrazol-4-yl)-4,4,5,5-tetramethyl-4,5-dihydroimidazole-3-oxide-1-oxyl)-octakis(hexafluoroacetylacetonato)-tetra-copper(ii)t-butylbenzene solvate).	1:1	2	1	κ1	M1	2	none	pyrazol, acetylacetonato	increases connectivity	heterocyclic N-oxide and co-ligand	A*M1	A*B01)2*M1	A*B2*B01)2	0D	1D	1	none	1,2M3-1	2C1
KITYOD	K.Yu.Maryunina,G.V.Romanenko,E.M.Zueva,S.V.Fokin,A.S.Bogomyakov,V.I.Ovcharenko IZV.AKAD.NAUK SSSR,SER.KHIM.(RUSS.)(RUSS.CHEM.BULL.),2013,2337	catena-(tetrakis(\m-2-(1-butyl-1H-pyrazol-4-yl)-4,4,5,5-tetramethyl-4,5-dihydroimidazole-3-oxide-1-oxyl)-octakis(hexafluoroacetylacetonato)-tetra-copper(ii)isopropylbenzene solvate).	1:1	2	1	κ1	M1	2	none	pyrazol, acetylacetonato	increases connectivity	heterocyclic N-oxide and co-ligand	A*M1	A*B01)2*M1	A*B2*B01)2	0D	1D	1	none	1,2M3-1	2C1
KITYOD01	K.Yu.Maryunina,G.V.Romanenko,E.M.Zueva,S.V.Fokin,A.S.Bogomyakov,V.I.Ovcharenko IZV.AKAD.NAUK SSSR,SER.KHIM.(RUSS.)(RUSS.CHEM.BULL.),2013,2337	catena-(tetrakis(\m-2-(1-butyl-1H-pyrazol-4-yl)-4,4,5,5-tetramethyl-4,5-dihydroimidazole-3-oxide-1-oxyl)-octakis(hexafluoroacetylacetonato)-tetra-copper(ii)isopropylbenzene solvate).	1:1	2	1	κ1	M1	2	none	pyrazol, acetylacetonato	increases connectivity	heterocyclic N-oxide and co-ligand	A*M1	A*B01)2*M1	A*B2*B01)2	0D	1D	1	none	1,2M3-1	2C1
KITYOD02	K.Yu.Maryunina,G.V.Romanenko,E.M.Zueva,S.V.Fokin,A.S.Bogomyakov,V.I.Ovcharenko IZV.AKAD.NAUK SSSR,SER.KHIM.(RUSS.)(RUSS.CHEM.BULL.),2013,2337	catena-(tetrakis(\m-2-(1-butyl-1H-pyrazol-4-yl)-4,4,5,5-tetramethyl-4,5-dihydroimidazole-3-oxide-1-oxyl)-octakis(hexafluoroacetylacetonato)-tetra-copper(ii)isopropylbenzene solvate).	1:1	2	1	κ1	M1	2	none	pyrazol, acetylacetonato	increases connectivity	heterocyclic N-oxide and co-ligand	A*M1	A*B01)2*M1	A*B2*B01)2	0D	1D	1	none	1,2M3-1	2C1
KITYOD03	K.Yu.Maryunina,G.V.Romanenko,E.M.Zueva,S.V.Fokin,A.S.Bogomyakov,V.I.Ovcharenko IZV.AKAD.NAUK SSSR,SER.KHIM.(RUSS.)(RUSS.CHEM.BULL.),2013,2337	catena-(tetrakis(\m-2-(1-butyl-1H-pyrazol-4-yl)-4,4,5,5-tetramethyl-4,5-dihydroimidazole-3-oxide-1-oxyl)-octakis(hexafluoroacetylacetonato)-tetra-copper(ii)isopropylbenzene solvate).	1:1	2	1	κ1	M1	2	none	pyrazol, acetylacetonato	increases connectivity	heterocyclic N-oxide and co-ligand	A*M1	A*B01)2*M1	A*B2*B01)2	0D	1D	1	none	1,2M3-1	2C1
KITYOD04	K.Yu.Maryunina,G.V.Romanenko,E.M.Zueva,S.V.Fokin,A.S.Bogomyakov,V.I.Ovcharenko IZV.AKAD.NAUK SSSR,SER.KHIM.(RUSS.)(RUSS.CHEM.BULL.),2013,2337	catena-(tetrakis(\m-2-(1-butyl-1H-pyrazol-4-yl)-4,4,5,5-tetramethyl-4,5-dihydroimidazole-3-oxide-1-oxyl)-octakis(hexafluoroacetylacetonato)-tetra-copper(ii)isopropylbenzene solvate).	1:1	2	1	κ1	M1	2	none	pyrazol, acetylacetonato	increases connectivity	heterocyclic N-oxide and co-ligand	A*M1	A*B01)2*M1	A*B2*B01)2	0D	1D	1	none	1,2M3-1	2C1
KOBGOZ	N.A.Artyukhova,K.Yu.Maryunina,S.V.Fokin,E.V.Tretyakov,G.V.Romanenko,A.V.Polushkin,A.S.Bogomyakov,R.Z.Sagdeev,B.I.Ovcharenko IZV.AKAD.NAUK SSSR,SER.KHIM.(RUSS.)(RUSS.CHEM.BULL.),2013,2132	bis(\m~3~-12-(pyridin-3-yl)-11,13-diazadispiro[4.0.4.3]tridec-12-ene-11-olato-13-oxide)-octakis(1,1,1,5,5,5,-hexafluoroacetaylacetonato)-tetra-copper.	2:1	2	2	κ1	B2	1	none	pyridin, acetylacetonato	increases connectivity	heterocyclic N-oxide and co-ligand	A)2*B2	A)2*B01)4*M1	A)2*T3*B01)4	0D	0D	1	4	1,2M3-1	1,1,3,3,4M14-1
KOBGOZ01	N.A.Artyukhova,K.Yu.Maryunina,S.V.Fokin,E.V.Tretyakov,G.V.Romanenko,A.V.Polushkin,A.S.Bogomyakov,R.Z.Sagdeev,B.I.Ovcharenko IZV.AKAD.NAUK SSSR,SER.KHIM.(RUSS.)(RUSS.CHEM.BULL.),2013,2132	bis(\m~3~-12-(pyridin-3-yl)-11,13-diazadispiro[4.0.4.3]tridec-12-ene-11-olato-13-oxide)-octakis(1,1,1,5,5,5,-hexafluoroacetaylacetonato)-tetra-copper.	2:1	2	2	κ1	B2	1	none	pyridin, acetylacetonato	increases connectivity	heterocyclic N-oxide and co-ligand	A)2*B2	A)2*B01)4*M1	A)2*T3*B01)4	0D	0D	1	4	1,2M3-1	1,1,3,3,4M14-1
KOBGOZ02	N.A.Artyukhova,K.Yu.Maryunina,S.V.Fokin,E.V.Tretyakov,G.V.Romanenko,A.V.Polushkin,A.S.Bogomyakov,R.Z.Sagdeev,B.I.Ovcharenko IZV.AKAD.NAUK SSSR,SER.KHIM.(RUSS.)(RUSS.CHEM.BULL.),2013,2132	bis(\m~3~-12-(pyridin-3-yl)-11,13-diazadispiro[4.0.4.3]tridec-12-ene-11-olato-13-oxide)-octakis(1,1,1,5,5,5,-hexafluoroacetaylacetonato)-tetra-copper.	2:1	2	2	κ1	B2	1	none	pyridin, acetylacetonato	increases connectivity	heterocyclic N-oxide and co-ligand	A)2*B2	A)2*B01)4*M1	A)2*T3*B01)4	0D	0D	1	4	1,2M3-1	1,1,3,3,4M14-1
KOBGOZ03	N.A.Artyukhova,K.Yu.Maryunina,S.V.Fokin,E.V.Tretyakov,G.V.Romanenko,A.V.Polushkin,A.S.Bogomyakov,R.Z.Sagdeev,B.I.Ovcharenko IZV.AKAD.NAUK SSSR,SER.KHIM.(RUSS.)(RUSS.CHEM.BULL.),2013,2132	bis(\m~3~-12-(pyridin-3-yl)-11,13-diazadispiro[4.0.4.3]tridec-12-ene-11-olato-13-oxide)-octakis(1,1,1,5,5,5,-hexafluoroacetaylacetonato)-tetra-copper.	2:1	2	2	κ1	B2	1	none	pyridin, acetylacetonato	increases connectivity	heterocyclic N-oxide and co-ligand	A)2*B2	A)2*B01)4*M1	A)2*T3*B01)4	0D	0D	1	4	1,2M3-1	1,1,3,3,4M14-1
KOBHIU	N.A.Artyukhova,K.Yu.Maryunina,S.V.Fokin,E.V.Tretyakov,G.V.Romanenko,A.V.Polushkin,A.S.Bogomyakov,R.Z.Sagdeev,B.I.Ovcharenko IZV.AKAD.NAUK SSSR,SER.KHIM.(RUSS.)(RUSS.CHEM.BULL.),2013,2132	catena-[bis(\m~3~-12-(pyridin-3-yl)-11,13-diazadispiro[4.0.4.3]tridec-12-ene-11-olato-13-oxide)-hexakis(1,1,1,5,5,5,-hexafluoroacetaylacetonato)-tri-copper].	3:2	2	2	κ1	B2	2, 1	none	pyridin, acetylacetonato	increases connectivity	heterocyclic N-oxide and co-ligand	A)3*B2)2	A)3*B01)6*M1)2	A)3*T3)2*B01)6	0D	1D	3	none	1,2,2M5-1	2,2,3C6
KOBHIU01	N.A.Artyukhova,K.Yu.Maryunina,S.V.Fokin,E.V.Tretyakov,G.V.Romanenko,A.V.Polushkin,A.S.Bogomyakov,R.Z.Sagdeev,B.I.Ovcharenko IZV.AKAD.NAUK SSSR,SER.KHIM.(RUSS.)(RUSS.CHEM.BULL.),2013,2132	catena-[bis(\m~3~-12-(pyridin-3-yl)-11,13-diazadispiro[4.0.4.3]tridec-12-ene-11-olato-13-oxide)-hexakis(1,1,1,5,5,5,-hexafluoroacetaylacetonato)-tri-copper].	3:2	2	2	κ1	B2	2, 1	none	pyridin, acetylacetonato	increases connectivity	heterocyclic N-oxide and co-ligand	A)3*B2)2	A)3*B01)6*M1)2	A)3*T3)2*B01)6	0D	1D	3	none	1,2,2M5-1	2,2,3C6
KOBHIU02	N.A.Artyukhova,K.Yu.Maryunina,S.V.Fokin,E.V.Tretyakov,G.V.Romanenko,A.V.Polushkin,A.S.Bogomyakov,R.Z.Sagdeev,B.I.Ovcharenko IZV.AKAD.NAUK SSSR,SER.KHIM.(RUSS.)(RUSS.CHEM.BULL.),2013,2132	catena-[bis(\m~3~-12-(pyridin-3-yl)-11,13-diazadispiro[4.0.4.3]tridec-12-ene-11-olato-13-oxide)-hexakis(1,1,1,5,5,5,-hexafluoroacetaylacetonato)-tri-copper].	3:2	2	2	κ1	B2	2, 1	none	pyridin, acetylacetonato	increases connectivity	heterocyclic N-oxide and co-ligand	A)3*B2)2	A)3*B01)6*M1)2	A)3*T3)2*B01)6	0D	1D	3	none	1,2,2M5-1	2,2,3C6
KOBHIU03	N.A.Artyukhova,K.Yu.Maryunina,S.V.Fokin,E.V.Tretyakov,G.V.Romanenko,A.V.Polushkin,A.S.Bogomyakov,R.Z.Sagdeev,B.I.Ovcharenko IZV.AKAD.NAUK SSSR,SER.KHIM.(RUSS.)(RUSS.CHEM.BULL.),2013,2132	catena-[bis(\m~3~-12-(pyridin-3-yl)-11,13-diazadispiro[4.0.4.3]tridec-12-ene-11-olato-13-oxide)-hexakis(1,1,1,5,5,5,-hexafluoroacetaylacetonato)-tri-copper].	3:2	2	2	κ1	B2	2, 1	none	pyridin, acetylacetonato	increases connectivity	heterocyclic N-oxide and co-ligand	A)3*B2)2	A)3*B01)6*M1)2	A)3*T3)2*B01)6	0D	1D	3	none	1,2,2M5-1	2,2,3C6
KUPKEL	A.B.Burdukov,V.I.Ovcharenko,N.V.Pervukhina,V.N.Ikorskii,N.V.Podberezskaya ZH.NEORG.KHIM.(RUSS.)(RUSS.J.INORG.CHEM.),1991,36,2058	bis(\m~2~-4-Isopropyl-2,2,5,5-tetramethyl-3-imidazoline-1-oxy)-tris(bis(hexafluoroacetylacetonato)-copper(ii)).	3:1	1	1	κ1	M1	2	none	acetylacetonato, imidazoline	increases connectivity	heterocyclic N-oxide and co-ligand	A)3*M1)2	A)3*B01)6*M1)2	A)3*B2)2*B01)6	0D	0D	1	3	1,2M3-1	1,1,2,3,4M11-1
KUPKIP	A.B.Burdukov,V.I.Ovcharenko,N.V.Pervukhina,V.N.Ikorskii,N.V.Podberezskaya ZH.NEORG.KHIM.(RUSS.)(RUSS.J.INORG.CHEM.),1991,36,2058	bis(\m~2~-4-Ethyl-2,2,5,5-tetramethyl-3-imidazoline-1-oxy)-tris(bis(hexafluoroacetylacetonato)-copper(ii)).	3:1	1	1	κ1	M1	2	none	acetylacetonato, imidazoline	increases connectivity	heterocyclic N-oxide and co-ligand	A)3*M1)2	A)3*B01)6*M1)2	A)3*B2)2*B01)6	0D	0D	1	3	1,2M3-1	1,1,2,3,4M11-1
KUTRUM	M.Antolovich,D.J.Phillips,A.D.Rae INORG.CHIM.ACTA,1991,190,205	Dibromo-(2-pyridinecarboxamide 1-oxide-O,O)-(2-pyridinecarboxamide1-oxide-O)-copper(ii).	1:2	1	1	κ1	M1	2	none	bromo	increases connectivity	heterocyclic N-oxide and co-ligand	A*M1)2	A*M1)3	A*B01*M1)3	0D	0D	1	1	1,2M3-1	1,4M5-1
LACMAE	S.V.Fokin,G.V.Romanenko,Yu.G.Shvedenkov,V.N.Ikorskii,S.F.Vasilevsky,E.V.Tret'yakov,V.I.Ovcharenko Zh.Strukt.Khim.(Russ.)(J.Struct.Chem.),2002,43,891	catena-(\m~2~-4,4,5,5-Tetramethyl-2-(1,3-dimethyl-1H-pyrazol-4-yl)imidazoline-1-oxyl-bis(hexafluoroacetylacetonato)-copper(ii)).	1:1	1	1	κ1	M1	1	none	acetylacetonato, pyrazol	increases connectivity	heterocyclic N-oxide and co-ligand	A*M1	A*B01)2*M1	A*B2*B01)2	0D	1D	1	none	1M2-1	2C1
LEXHEE	Yan-Li Gao,S.Nishihara,K.Inoue CRYSTENGCOMM,2018,20,2961	catena-[(\m-R-[(2,2,6,6-tetramethyl-4-piperidyl-l-oxy)iminomethyl]pyridineradical)-bis(1,1,1,5,5,5-hexafluoroacetylacetonato)-copper(ii)].	1:1	1	1	κ1	M1	1	none	pyridin, acetylacetonato	increases connectivity	heterocyclic N-oxide and co-ligand	A*M1	A*B01)2*M1	A*B2*B01)2	0D	1D	1	none	1M2-1	2C1
LIVJAB	Zong-Hui Jiang,Bai-Wang Sun,Dai-Zheng Liao,Geng-Lin Wang,F.Dahan,J.-P.Tuchagues INORG.CHIM.ACTA,1998,279,69	bis(2-(4-Chlorophenyl)-4,4,5,5-tetramethylimidazolin-1-oxyl-3-oxide)-bis(pentafluoropropanoato-O)-copper(ii).	1:2	2	1	κ1	M1	2	none	carboxylate	terminal	co-ligand	A*M1)2	A*M1)2	A*M1)4	0D	0D	1	1	1,2M3-1	1,4M5-1
LOBDIQ	Kai Jiang,Xiaoqiang Wang,Liya Wang,Baoli Zhao J.Coord.Chem.,2008,61,410	bis(\m~2~-4,4,5,5-Tetramethyl-2-(2-thienyl)imidazoline-1-oxyl-3-oxide)-hexakis(hexafluoroacetylacetonato)-tri-copper(ii).	3:2	2	2	κ1	B2	2, 1	none	acetylacetonato	terminal	co-ligand	A)3*B2)2	A*B01)2	A)3*B2)2*B01)6	0D	0D	3	3	1,2,2M5-1	1,1,2,3,4M11-1
LOJQEJ	N.Artiukhova,G.Romanenko,G.Letyagin,A.Bogomyakov,S.Veber,O.Minakova,M.Petrova,V.Morozov,V.Ovcharenko Crystals,2019,9,285	bis(\m-12-(4-ethylpyridin-3-yl)-11,13-diazadispiro[4.0.4^6^.3^5^]tridec-11-ene-13-oxide-11-oxyl)-octakis(1,1,1,5,5,5-hexafluoroacetylacetonato)-tetra-copper.	2:1	2	2	κ1	B2	1	none	pyridin, acetylacetonato	increases connectivity	heterocyclic N-oxide and co-ligand	A)2*B2	A)2*B01)4*M1	A)2*T3*B01)4	0D	0D	1	4	1,2M3-1	1,1,3,3,4M14-1
LOJQEJ01	N.Artiukhova,G.Romanenko,G.Letyagin,A.Bogomyakov,S.Veber,O.Minakova,M.Petrova,V.Morozov,V.Ovcharenko Crystals,2019,9,285	bis(\m-12-(4-ethylpyridin-3-yl)-11,13-diazadispiro[4.0.4^6^.3^5^]tridec-11-ene-13-oxide-11-oxyl)-octakis(1,1,1,5,5,5-hexafluoroacetylacetonato)-tetra-copper.	2:1	2	2	κ1	B2	1	none	pyridin, acetylacetonato	increases connectivity	heterocyclic N-oxide and co-ligand	A)2*B2	A)2*B01)4*M1	A)2*T3*B01)4	0D	0D	1	4	1,2M3-1	1,1,3,3,4M14-1
LOJQEJ02	N.Artiukhova,G.Romanenko,G.Letyagin,A.Bogomyakov,S.Veber,O.Minakova,M.Petrova,V.Morozov,V.Ovcharenko Crystals,2019,9,285	bis(\m-12-(4-ethylpyridin-3-yl)-11,13-diazadispiro[4.0.4^6^.3^5^]tridec-11-ene-13-oxide-11-oxyl)-octakis(1,1,1,5,5,5-hexafluoroacetylacetonato)-tetra-copper.	2:1	2	2	κ1	B2	1	none	pyridin, acetylacetonato	increases connectivity	heterocyclic N-oxide and co-ligand	A)2*B2	A)2*B01)4*M1	A)2*T3*B01)4	0D	0D	1	4	1,2M3-1	1,1,3,3,4M14-1
LOJQEJ03	N.Artiukhova,G.Romanenko,G.Letyagin,A.Bogomyakov,S.Veber,O.Minakova,M.Petrova,V.Morozov,V.Ovcharenko Crystals,2019,9,285	bis(\m-12-(4-ethylpyridin-3-yl)-11,13-diazadispiro[4.0.4^6^.3^5^]tridec-11-ene-13-oxide-11-oxyl)-octakis(1,1,1,5,5,5-hexafluoroacetylacetonato)-tetra-copper.	2:1	2	2	κ1	B2	1	none	pyridin, acetylacetonato	increases connectivity	heterocyclic N-oxide and co-ligand	A)2*B2	A)2*B01)4*M1	A)2*T3*B01)4	0D	0D	1	4	1,2M3-1	1,1,3,3,4M14-1
LOJQEJ04	N.Artiukhova,G.Romanenko,G.Letyagin,A.Bogomyakov,S.Veber,O.Minakova,M.Petrova,V.Morozov,V.Ovcharenko Crystals,2019,9,285	bis(\m-12-(4-ethylpyridin-3-yl)-11,13-diazadispiro[4.0.4^6^.3^5^]tridec-11-ene-13-oxide-11-oxyl)-octakis(1,1,1,5,5,5-hexafluoroacetylacetonato)-tetra-copper.	2:1	2	2	κ1	B2	1	none	pyridin, acetylacetonato	increases connectivity	heterocyclic N-oxide and co-ligand	A)2*B2	A)2*B01)4*M1	A)2*T3*B01)4	0D	0D	1	4	1,2M3-1	1,1,3,3,4M14-1
LOJQEJ05	N.Artiukhova,G.Romanenko,G.Letyagin,A.Bogomyakov,S.Veber,O.Minakova,M.Petrova,V.Morozov,V.Ovcharenko Crystals,2019,9,285	bis(\m-12-(4-ethylpyridin-3-yl)-11,13-diazadispiro[4.0.4^6^.3^5^]tridec-11-ene-13-oxide-11-oxyl)-octakis(1,1,1,5,5,5-hexafluoroacetylacetonato)-tetra-copper.	2:1	2	2	κ1	B2	1	none	pyridin, acetylacetonato	increases connectivity	heterocyclic N-oxide and co-ligand	A)2*B2	A)2*B01)4*M1	A)2*T3*B01)4	0D	0D	1	4	1,2M3-1	1,1,3,3,4M14-1
LOJQEJ06	N.Artiukhova,G.Romanenko,G.Letyagin,A.Bogomyakov,S.Veber,O.Minakova,M.Petrova,V.Morozov,V.Ovcharenko Crystals,2019,9,285	bis(\m-12-(4-ethylpyridin-3-yl)-11,13-diazadispiro[4.0.4^6^.3^5^]tridec-11-ene-13-oxide-11-oxyl)-octakis(1,1,1,5,5,5-hexafluoroacetylacetonato)-tetra-copper.	2:1	2	2	κ1	B2	1	none	pyridin, acetylacetonato	increases connectivity	heterocyclic N-oxide and co-ligand	A)2*B2	A)2*B01)4*M1	A)2*T3*B01)4	0D	0D	1	4	1,2M3-1	1,1,3,3,4M14-1
LOJQEJ07	N.Artiukhova,G.Romanenko,G.Letyagin,A.Bogomyakov,S.Veber,O.Minakova,M.Petrova,V.Morozov,V.Ovcharenko Crystals,2019,9,285	bis(\m-12-(4-ethylpyridin-3-yl)-11,13-diazadispiro[4.0.4^6^.3^5^]tridec-11-ene-13-oxide-11-oxyl)-octakis(1,1,1,5,5,5-hexafluoroacetylacetonato)-tetra-copper.	2:1	2	2	κ1	B2	1	none	pyridin, acetylacetonato	increases connectivity	heterocyclic N-oxide and co-ligand	A)2*B2	A)2*B01)4*M1	A)2*T3*B01)4	0D	0D	1	4	1,2M3-1	1,1,3,3,4M14-1
LOJQEJ08	N.Artiukhova,G.Romanenko,G.Letyagin,A.Bogomyakov,S.Veber,O.Minakova,M.Petrova,V.Morozov,V.Ovcharenko Crystals,2019,9,285	bis(\m-12-(4-ethylpyridin-3-yl)-11,13-diazadispiro[4.0.4^6^.3^5^]tridec-11-ene-13-oxide-11-oxyl)-octakis(1,1,1,5,5,5-hexafluoroacetylacetonato)-tetra-copper.	2:1	2	2	κ1	B2	1	none	pyridin, acetylacetonato	increases connectivity	heterocyclic N-oxide and co-ligand	A)2*B2	A)2*B01)4*M1	A)2*T3*B01)4	0D	0D	1	4	1,2M3-1	1,1,3,3,4M14-1
LOJQEJ09	N.Artiukhova,G.Romanenko,G.Letyagin,A.Bogomyakov,S.Veber,O.Minakova,M.Petrova,V.Morozov,V.Ovcharenko Crystals,2019,9,285	bis(\m-12-(4-ethylpyridin-3-yl)-11,13-diazadispiro[4.0.4^6^.3^5^]tridec-11-ene-13-oxide-11-oxyl)-octakis(1,1,1,5,5,5-hexafluoroacetylacetonato)-tetra-copper.	2:1	2	2	κ1	B2	1	none	pyridin, acetylacetonato	increases connectivity	heterocyclic N-oxide and co-ligand	A)2*B2	A)2*B01)4*M1	A)2*T3*B01)4	0D	0D	1	4	1,2M3-1	1,1,3,3,4M14-1
LUPMUE	V.I.Ovcharenko,S.V.Fokin,G.V.Romanenko,Yu.G.Shvedenkov,V.I.Ikorskii,E.V.Tretyakov,S.F.Vasilevsky Zh.Strukt.Khim.(Russ.)(J.Struct.Chem.),2002,43,163	catena-((\m~2~-2-(1-Methylpyrazol-4-yl)-4,4,5,5-tetramethylimidazoline-3-oxide-1-oxyl-N',O)-bis(hexafluoroacetylacetonato-O,O')-copper(ii)).	1:1	2	1	κ1	M1	1	none	acetylacetonato, pyrazol	increases connectivity	heterocyclic N-oxide and co-ligand	A*M1	A*B01)2*M1	A*B2*B01)2	0D	1D	1	none	1M2-1	2C1
LUPMUE02	S.Fokin,V.Ovcharenko,G.Romanenko,V.Ikorskii INORG.CHEM.,2004,43,969	catena-(bis(\m~2~-2-(1-Methylpyrazol-4-yl)-4,4,5,5-tetramethylimidazoline-3-oxide-1-oxyl-N',O)-tetrakis(hexafluoroacetylacetonato-O,O')-di-copper(ii)).	1:1	2	1	κ1	M1	1	none	acetylacetonato, pyrazol	increases connectivity	heterocyclic N-oxide and co-ligand	A*M1	A*B01)2*M1	A*B2*B01)2	0D	1D	1	none	1M2-1	2C1
LUPMUE03	V.I.Ovcharenko,K.Yu.Maryunina,S.V.Fokin,E.V.Tretyakov,G.V.Romanenko,V.N.Ikorskii IZV.AKAD.NAUK SSSR,SER.KHIM.(RUSS.)(RUSS.CHEM.BULL.),2004,2304	catena-[bis(\m~2~-2-(1-Trideuteromethylpyrazol-4-yl)-4,4,5,5-tetramethylimidazolin-3-oxide-1-oxylradical-N',O)-tetrakis(hexafluoroacetylacetonato-O,O')-di-copper(ii)].	1:1	2	1	κ1	M1	1	none	pyrazol, acetylacetonato	increases connectivity	heterocyclic N-oxide and co-ligand	A*M1	A)2*B01)5*M1	A)2*T11*B2*B01)4	0D	1D	1	none	1M2-1	2C1
LUPMUE04	V.I.Ovcharenko,K.Yu.Maryunina,S.V.Fokin,E.V.Tretyakov,G.V.Romanenko,V.N.Ikorskii IZV.AKAD.NAUK SSSR,SER.KHIM.(RUSS.)(RUSS.CHEM.BULL.),2004,2304	catena-[bis(\m~2~-2-(1-Trideuteromethylpyrazol-4-yl)-4,4,5,5-tetramethylimidazolin-3-oxide-1-oxylradical-N',O)-tetrakis(hexafluoroacetylacetonato-O,O')-di-copper(ii)].	1:1	2	1	κ1	M1	1	none	acetylacetonato, pyrazol	increases connectivity	heterocyclic N-oxide and co-ligand	A*M1	A*B01)2*M1	A*B2*B01)2	0D	1D	1	none	1M2-1	2C1
LUPMUE05	V.I.Ovcharenko,K.Yu.Maryunina,S.V.Fokin,E.V.Tretyakov,G.V.Romanenko,V.N.Ikorskii IZV.AKAD.NAUK SSSR,SER.KHIM.(RUSS.)(RUSS.CHEM.BULL.),2004,2304	catena-[(\m~2~-2-(1-Trideuteromethylpyrazol-4-yl)-4,4,5,5-tetramethylimidazolin-3-oxide-1-oxyl.	1:1	2	1	κ1	M1	1	none	pyrazol	increases connectivity	heterocyclic N-oxide and co-ligand	A*M1	A*B01)2*M1	A*B2*B01)2	0D	1D	1	none	1M2-1	2C1
LUPMUE06	V.I.Ovcharenko,K.Yu.Maryunina,S.V.Fokin,E.V.Tretyakov,G.V.Romanenko,V.N.Ikorskii IZV.AKAD.NAUK SSSR,SER.KHIM.(RUSS.)(RUSS.CHEM.BULL.),2004,2304	catena-[bis(\m~2~-2-(1-Methylpyrazol-4-yl)-4,4,5,5-tetramethylimidazolin-3-oxide-1-oxylradical-N',O)-tetrakis(hexafluoroacetylacetonato-O,O')-di-copper(ii)].	1:1	2	1	κ1	M1	1	none	pyrazol, acetylacetonato	increases connectivity	heterocyclic N-oxide and co-ligand	A*M1	A*B01)2*M1	A*B2*B01)2	0D	1D	1	none	1M2-1	2C1
LUPMUE07	V.I.Ovcharenko,K.Yu.Maryunina,S.V.Fokin,E.V.Tretyakov,G.V.Romanenko,V.N.Ikorskii IZV.AKAD.NAUK SSSR,SER.KHIM.(RUSS.)(RUSS.CHEM.BULL.),2004,2304	catena-[(\m~2~-2-(1-Methylpyrazol-4-yl)-4,4,5,5-tetramethylimidazolin-3-oxide-1-oxyl radical-N',O)-bis(hexafluoroacetylacetonato-O,O')-copper(ii)].	1:1	2	1	κ1	M1	1	none	acetylacetonato, pyrazol	increases connectivity	heterocyclic N-oxide and co-ligand	A*M1	A*B01)2*M1	A*B2*B01)2	0D	1D	1	none	1M2-1	2C1
LUPMUE10	K.Yu.Maryunina,Xiao Zhang,S.Nishihara,K.Inoue,V.A.Morozov,G.V.Romanenko,V.I.Ovcharenko J.Mater.Chem.C,2015,3,7788	catena-(bis(\m~2~-2-(1-Methylpyrazol-4-yl)-4,4,5,5-tetramethylimidazoline-3-oxide-1-oxyl-N',O)-tetrakis(hexafluoroacetylacetonato-O,O')-di-copper(ii)).	1:1	2	1	κ1	M1	1	none	acetylacetonato, pyrazol	increases connectivity	heterocyclic N-oxide and co-ligand	A*M1	A*B01)2*M1	A*B2*B01)2	0D	1D	1	none	1M2-1	2C1
LUPMUE11	K.Yu.Maryunina,Xiao Zhang,S.Nishihara,K.Inoue,V.A.Morozov,G.V.Romanenko,V.I.Ovcharenko J.Mater.Chem.C,2015,3,7788	catena-((\m~2~-2-(1-Methylpyrazol-4-yl)-4,4,5,5-tetramethylimidazoline-3-oxide-1-oxyl-N',O)-bis(hexafluoroacetylacetonato-O,O')-copper(ii)).	1:1	2	1	κ1	M1	1	none	acetylacetonato, pyrazol	increases connectivity	heterocyclic N-oxide and co-ligand	A*M1	A*B01)2*M1	A*B2*B01)2	0D	1D	1	none	1M2-1	2C1
LUPMUE12	K.Yu.Maryunina,Xiao Zhang,S.Nishihara,K.Inoue,V.A.Morozov,G.V.Romanenko,V.I.Ovcharenko J.Mater.Chem.C,2015,3,7788	catena-((\m~2~-2-(1-Methylpyrazol-4-yl)-4,4,5,5-tetramethylimidazoline-3-oxide-1-oxyl-N',O)-bis(hexafluoroacetylacetonato-O,O')-copper(ii)).	1:1	2	1	κ1	M1	1	none	acetylacetonato, pyrazol	increases connectivity	heterocyclic N-oxide and co-ligand	A*M1	A*B01)2*M1	A*B2*B01)2	0D	1D	1	none	1M2-1	2C1
LUPMUE13	K.Yu.Maryunina,Xiao Zhang,S.Nishihara,K.Inoue,V.A.Morozov,G.V.Romanenko,V.I.Ovcharenko J.Mater.Chem.C,2015,3,7788	catena-(bis(\m~2~-2-(1-Methylpyrazol-4-yl)-4,4,5,5-tetramethylimidazoline-3-oxide-1-oxyl-N',O)-tetrakis(hexafluoroacetylacetonato-O,O')-di-copper(ii)).	1:1	2	1	κ1	M1	1	none	acetylacetonato, pyrazol	increases connectivity	heterocyclic N-oxide and co-ligand	A*M1	A*B01)2*M1	A*B2*B01)2	0D	1D	1	none	1M2-1	2C1
LUPMUE14	K.Yu.Maryunina,Xiao Zhang,S.Nishihara,K.Inoue,V.A.Morozov,G.V.Romanenko,V.I.Ovcharenko J.Mater.Chem.C,2015,3,7788	catena-(bis(\m~2~-2-(1-Methylpyrazol-4-yl)-4,4,5,5-tetramethylimidazoline-3-oxide-1-oxyl-N',O)-tetrakis(hexafluoroacetylacetonato-O,O')-di-copper(ii)).	1:1	2	1	κ1	M1	1	none	pyrazol, acetylacetonato	increases connectivity	heterocyclic N-oxide and co-ligand	A*M1	A*B01)2*M1	A*B2*B01)2	0D	1D	1	none	1M2-1	2C1
LUPNEP	V.I.Ovcharenko,S.V.Fokin,G.V.Romanenko,Yu.G.Shvedenkov,V.I.Ikorskii,E.V.Tretyakov,S.F.Vasilevsky Zh.Strukt.Khim.(Russ.)(J.Struct.Chem.),2002,43,163	catena-((\m~2~-2-(1-Methylpyrazol-4-yl)-4,4,5,5-tetramethylimidazoline-3-oxide-1-oxyl-N',O)-(\m~2~-2-(1-ethylpyrazol-4-yl)-4,4,5,5-tetramethylimidazoline-3-oxide-1-oxyl-N',O)-tetrakis(hexafluoroacetylacetonato-O,O')-di-copper(ii)).	1:1	2	1	κ1	M1	1	none	pyrazol, acetylacetonato	increases connectivity	heterocyclic N-oxide and co-ligand	A*M1	A*B01)2*M1	A*B2*B01)2	0D	1D	1	none	1M2-1	2C1
LUPNEP01	V.I.Ovcharenko,S.V.Fokin,G.V.Romanenko,Yu.G.Shvedenkov,V.I.Ikorskii,E.V.Tretyakov,S.F.Vasilevsky Zh.Strukt.Khim.(Russ.)(J.Struct.Chem.),2002,43,163	catena-((\m~2~-2-(1-Methylpyrazol-4-yl)-4,4,5,5-tetramethylimidazoline-3-oxide-1-oxyl-N',O)-(\m~2~-2-(1-ethylpyrazol-4-yl)-4,4,5,5-tetramethylimidazoline-3-oxide-1-oxyl-N',O)-tetrakis(hexafluoroacetylacetonato-O,O')-di-copper(ii)).	1:1	2	1	κ1	M1	1	none	acetylacetonato, pyrazol	increases connectivity	heterocyclic N-oxide and co-ligand	A*M1	A*B01)2*M1	A*B2*B01)2	0D	1D	1	none	1M2-1	2C1
LUPNOZ	V.I.Ovcharenko,S.V.Fokin,G.V.Romanenko,Yu.G.Shvedenkov,V.I.Ikorskii,E.V.Tretyakov,S.F.Vasilevsky Zh.Strukt.Khim.(Russ.)(J.Struct.Chem.),2002,43,163	catena-(bis((\m~2~-2-(1-Ethylpyrazol-4-yl)-4,4,5,5-tetramethylimidazoline-3-oxide-1-oxyl-N',O)-bis(hexafluoroacetylacetonato-O,O')-copper(ii))).	1:1	2	1	κ1	M1	2	none	pyrazol, acetylacetonato	increases connectivity	heterocyclic N-oxide and co-ligand	A*M1	A*B01)2*M1	A*B2*B01)2	0D	1D	1	none	1,2M3-1	2C1
LUPNOZ01	V.I.Ovcharenko,S.V.Fokin,G.V.Romanenko,Yu.G.Shvedenkov,V.I.Ikorskii,E.V.Tretyakov,S.F.Vasilevsky Zh.Strukt.Khim.(Russ.)(J.Struct.Chem.),2002,43,163	catena-(bis((\m~2~-2-(1-Ethylpyrazol-4-yl)-4,4,5,5-tetramethylimidazoline-3-oxide-1-oxyl-N',O)-bis(hexafluoroacetylacetonato-O,O')-copper(ii))).	1:1	2	1	κ1	M1	2	none	pyrazol, acetylacetonato	increases connectivity	heterocyclic N-oxide and co-ligand	A*M1	A*B01)2*M1	A*B2*B01)2	0D	1D	1	none	1,2M3-1	2C1
LUPNOZ02	V.I.Ovcharenko,S.V.Fokin,G.V.Romanenko,Yu.G.Shvedenkov,V.I.Ikorskii,E.V.Tretyakov,S.F.Vasilevsky Zh.Strukt.Khim.(Russ.)(J.Struct.Chem.),2002,43,163	catena-(bis((\m~2~-2-(1-Ethylpyrazol-4-yl)-4,4,5,5-tetramethylimidazoline-3-oxide-1-oxyl-N',O)-bis(hexafluoroacetylacetonato-O,O')-copper(ii))).	1:1	2	1	κ1	M1	2	none	pyrazol, acetylacetonato	increases connectivity	heterocyclic N-oxide and co-ligand	A*M1	A*B01)2*M1	A*B2*B01)2	0D	1D	1	none	1,2M3-1	2C1
LUPNOZ03	K.Maryunina,S.Fokin,V.Ovcharenko,G.Romanenko,V.Ikorskii POLYHEDRON,2005,24,2094	catena-(bis(\m~2~-4,4,5,5-Tetramethyl-2-(1-ethylpyrazole-4-yl)-4,5-dihydro-1H-imidazol-3-oxide-1-oxyl)-tetrakis(1,1,1,5,5,5-hexafluoropentan-2,4-dionato)-di-copper(ii)). catena-(bis(mu!2$-2-(1-Ethylpyrazol-4-yl)-4,4,5,5-tetramethylimidazoline-3-oxide-1-oxyl-N,O)-tetrakis(hexafluoroacetylacetonato-O,O')-di-copper(ii)).	1:1	2	1	κ1	M1	2	none	pyrazol, acetylacetonato	increases connectivity	heterocyclic N-oxide and co-ligand	A*M1	A*B01)2*M1	A*B2*B01)2	0D	1D	1	none	1,2M3-1	2C1
LUPNOZ04	K.Maryunina,S.Fokin,V.Ovcharenko,G.Romanenko,V.Ikorskii POLYHEDRON,2005,24,2094	catena-(bis(\m~2~-4,4,5,5-Tetramethyl-2-(1-ethylpyrazole-4-yl)-4,5-dihydro-1H-imidazol-3-oxide-1-oxyl)-tetrakis(1,1,1,5,5,5-hexafluoropentan-2,4-dionato)-di-copper(ii)). catena-(bis(mu!2$-2-(1-Ethylpyrazol-4-yl)-4,4,5,5-tetramethylimidazoline-3-oxide-1-oxyl-N,O)-tetrakis(hexafluoroacetylacetonato-O,O')-di-copper(ii)).	1:1	2	1	κ1	M1	2	none	pyrazol, acetylacetonato	increases connectivity	heterocyclic N-oxide and co-ligand	A*M1	A*B01)2*M1	A*B2*B01)2	0D	1D	1	none	1,2M3-1	2C1
LUPNOZ05	K.Maryunina,S.Fokin,V.Ovcharenko,G.Romanenko,V.Ikorskii POLYHEDRON,2005,24,2094	catena-(bis(\m~2~-4,4,5,5-Tetramethyl-2-(1-ethylpyrazole-4-yl)-4,5-dihydro-1H-imidazol-3-oxide-1-oxyl)-tetrakis(1,1,1,5,5,5-hexafluoropentan-2,4-dionato)-di-copper(ii)). catena-(bis(mu!2$-2-(1-Ethylpyrazol-4-yl)-4,4,5,5-tetramethylimidazoline-3-oxide-1-oxyl-N,O)-tetrakis(hexafluoroacetylacetonato-O,O')-di-copper(ii)).	1:1	2	1	κ1	M1	2	none	pyrazol, acetylacetonato	increases connectivity	heterocyclic N-oxide and co-ligand	A*M1	A*B01)2*M1	A*B2*B01)2	0D	1D	1	none	1,2M3-1	2C1
LUPNOZ06	K.Maryunina,S.Fokin,V.Ovcharenko,G.Romanenko,V.Ikorskii POLYHEDRON,2005,24,2094	catena-(bis(\m~2~-4,4,5,5-Tetramethyl-2-(1-ethylpyrazole-4-yl)-4,5-dihydro-1H-imidazol-3-oxide-1-oxyl)-tetrakis(1,1,1,5,5,5-hexafluoropentan-2,4-dionato)-di-copper(ii)). catena-(bis(mu!2$-2-(1-Ethylpyrazol-4-yl)-4,4,5,5-tetramethylimidazoline-3-oxide-1-oxyl-N,O)-tetrakis(hexafluoroacetylacetonato-O,O')-di-copper(ii)).	1:1	2	1	κ1	M1	2	none	pyrazol, acetylacetonato	increases connectivity	heterocyclic N-oxide and co-ligand	A*M1	A*B01)2*M1	A*B2*B01)2	0D	1D	1	none	1,2M3-1	2C1
LUPNOZ07	K.Maryunina,S.Fokin,V.Ovcharenko,G.Romanenko,V.Ikorskii POLYHEDRON,2005,24,2094	catena-(bis(\m~2~-4,4,5,5-Tetramethyl-2-(1-ethylpyrazole-4-yl)-4,5-dihydro-1H-imidazol-3-oxide-1-oxyl)-tetrakis(1,1,1,5,5,5-hexafluoropentan-2,4-dionato)-di-copper(ii)). catena-(bis(mu!2$-2-(1-Ethylpyrazol-4-yl)-4,4,5,5-tetramethylimidazoline-3-oxide-1-oxyl-N,O)-tetrakis(hexafluoroacetylacetonato-O,O')-di-copper(ii)).	1:1	2	1	κ1	M1	2	none	pyrazol, acetylacetonato	increases connectivity	heterocyclic N-oxide and co-ligand	A*M1	A*B01)2*M1	A*B2*B01)2	0D	1D	1	none	1,2M3-1	2C1
LUPNOZ09	M.Fedin,S.Veber,I.Gromov,K.Maryunina,S.Fokin,G.Romanenko,R.Sagdeev,V.Ovcharenko,E.Bagryanskaya INORG.CHEM.,2007,46,11405	catena-(bis(\m~2~-2-(1-Ethylpyrazol-4-yl)-4,4,5,5-tetramethylimidazoline-3-oxide-1-oxyl-N,O)-tetrakis(hexafluoroacetylacetonato-O,O')-di-copper(ii)).	1:1	2	1	κ1	M1	2	none	pyrazol, acetylacetonato	increases connectivity	heterocyclic N-oxide and co-ligand	A*M1	A*B01)2*M1	A*B2*B01)2	0D	1D	1	none	1,2M3-1	2C1
LUPNOZ15	G.V.Romanenko,G.A.Letyagin,K.Yu.Maryunina,A.S.Bogomyakov,S.Nishihara,K.Inoue,V.I.Ovcharenkoalina Romanenko CSD Communication(Private Communication),2020,	catena-(bis((\m~2~-2-(1-ethylpyrazol-4-yl)-4,4,5,5-tetramethylimidazoline-3-oxide-1-oxyl-N',O)-bis(hexafluoroacetylacetonato-O,O')-copper(ii))).	1:1	2	1	κ1	M1	2	none	pyrazol, acetylacetonato	increases connectivity	heterocyclic N-oxide and co-ligand	A*M1	A*B01)2*M1	A*B2*B01)2	0D	1D	1	none	1,2M3-1	2C1
LUPNOZ16	G.V.Romanenko,G.A.Letyagin,K.Yu.Maryunina,A.S.Bogomyakov,S.Nishihara,K.Inoue,V.I.Ovcharenkoalina Romanenko CSD Communication(Private Communication),2020,	catena-(bis((\m~2~-2-(1-ethylpyrazol-4-yl)-4,4,5,5-tetramethylimidazoline-3-oxide-1-oxyl-N',O)-bis(hexafluoroacetylacetonato-O,O')-copper(ii))).	1:1	2	1	κ1	M1	2	none	pyrazol, acetylacetonato	increases connectivity	heterocyclic N-oxide and co-ligand	A*M1	A*B01)2*M1	A*B2*B01)2	0D	1D	1	none	1,2M3-1	2C1
LUPNOZ17	G.V.Romanenko,G.A.Letyagin,K.Yu.Maryunina,A.S.Bogomyakov,S.Nishihara,K.Inoue,V.I.Ovcharenkoalina Romanenko CSD Communication(Private Communication),2020,	catena-(bis(\m-2-(1-ethylpyrazol-4-yl)-4,4,5,5-tetramethylimidazoline-3-oxide-1-oxyl-N,O)-tetrakis(hexafluoroacetylacetonato-O,O')-di-copper(ii)).	1:1	2	1	κ1	M1	2	none	pyrazol, acetylacetonato	increases connectivity	heterocyclic N-oxide and co-ligand	A*M1	A*B01)2*M1	A*B2*B01)2	0D	1D	1	none	1,2M3-1	2C1
LUPNOZ18	G.V.Romanenko,G.A.Letyagin,K.Yu.Maryunina,A.S.Bogomyakov,S.Nishihara,K.Inoue,V.I.Ovcharenkoalina Romanenko CSD Communication(Private Communication),2020,	catena-[bis(\m-[2-(1-ethyl-1H-pyrazol-4-yl)-4,4,5,5-tetramethyl-3-oxo-4,5-dihydro-1H-imidazol-1-yl]oxidanylradical)-tetrakis(1,1,1,5,5,5-hexafluoroacetylacetonato)-di-copper].	1:1	2	1	κ1	M1	2	none	pyrazol, acetylacetonato	increases connectivity	heterocyclic N-oxide and co-ligand	A*M1	A*B01)2*M1	A*B2*B01)2	0D	1D	1	none	1,2M3-1	2C1
LUPNOZ19	G.V.Romanenko,G.A.Letyagin,K.Yu.Maryunina,A.S.Bogomyakov,S.Nishihara,K.Inoue,V.I.Ovcharenkoalina Romanenko CSD Communication(Private Communication),2020,	catena-[bis(\m-[2-(1-ethyl-1H-pyrazol-4-yl)-4,4,5,5-tetramethyl-3-oxo-4,5-dihydro-1H-imidazol-1-yl]oxidanylradical)-tetrakis(1,1,1,5,5,5-hexafluoroacetylacetonato)-di-copper].	1:1	2	1	κ1	M1	2	none	pyrazol, acetylacetonato	increases connectivity	heterocyclic N-oxide and co-ligand	A*M1	A*B01)2*M1	A*B2*B01)2	0D	1D	1	none	1,2M3-1	2C1
LUPPIV	V.I.Ovcharenko,S.V.Fokin,G.V.Romanenko,Yu.G.Shvedenkov,V.I.Ikorskii,E.V.Tretyakov,S.F.Vasilevsky Zh.Strukt.Khim.(Russ.)(J.Struct.Chem.),2002,43,163	catena-(bis((\m~2~-2-(1-n-Propylpyrazol-4-yl)-4,4,5,5-tetramethylimidazoline-3-oxide-1-oxyl-N',O)-bis(hexafluoroacetylacetonato-O,O')-copper(ii))).	1:1	2	1	κ1	M1	2	none	pyrazol, acetylacetonato	increases connectivity	heterocyclic N-oxide and co-ligand	A*M1	A*B01)2*M1	A*B2*B01)2	0D	1D	1	none	1,2M3-1	2C1
LUPPIV01	V.I.Ovcharenko,S.V.Fokin,G.V.Romanenko,Yu.G.Shvedenkov,V.I.Ikorskii,E.V.Tretyakov,S.F.Vasilevsky Zh.Strukt.Khim.(Russ.)(J.Struct.Chem.),2002,43,163	catena-(bis((\m~2~-2-(1-n-Propylpyrazol-4-yl)-4,4,5,5-tetramethylimidazoline-3-oxide-1-oxyl-N',O)-bis(hexafluoroacetylacetonato-O,O')-copper(ii))).	1:1	2	1	κ1	M1	2	none	pyrazol, acetylacetonato	increases connectivity	heterocyclic N-oxide and co-ligand	A*M1	A*B01)2*M1	A*B2*B01)2	0D	1D	1	none	1,2M3-1	2C1
LUPPIV02	V.I.Ovcharenko,S.V.Fokin,G.V.Romanenko,Yu.G.Shvedenkov,V.I.Ikorskii,E.V.Tretyakov,S.F.Vasilevsky Zh.Strukt.Khim.(Russ.)(J.Struct.Chem.),2002,43,163	catena-(tetrakis((\m~2~-2-(1-Propylpyrazol-4-yl)-4,4,5,5-tetramethylimidazoline-3-oxide-1-oxyl)-bis(hexafluoroacetylacetonato-O,O')-copper(ii))).	1:1	2	1	κ1	M1	2	none	pyrazol, acetylacetonato	increases connectivity	heterocyclic N-oxide and co-ligand	A*M1	A*B01)2*M1	A*B2*B01)2	0D	1D	1	none	1,2M3-1	2C1
LUPPIV03	M.Fedin,S.Veber,I.Gromov,K.Maryunina,S.Fokin,G.Romanenko,R.Sagdeev,V.Ovcharenko,E.Bagryanskaya INORG.CHEM.,2007,46,11405	catena-(tetrakis(\m~2~-2-(1-n-Propylpyrazol-4-yl)-4,4,5,5-tetramethylimidazoline-3-oxide-1-oxyl-N,O)-octakis(hexafluoroacetylacetonato-O,O')-tetra-copper(ii)).	1:1	2	1	κ1	M1	2	none	pyrazol, acetylacetonato	increases connectivity	heterocyclic N-oxide and co-ligand	A*M1	A*B01)2*M1	A*B2*B01)2	0D	1D	1	none	1,2M3-1	2C1
LUPPIV04	M.Fedin,S.Veber,I.Gromov,K.Maryunina,S.Fokin,G.Romanenko,R.Sagdeev,V.Ovcharenko,E.Bagryanskaya INORG.CHEM.,2007,46,11405	catena-(tetrakis(\m~2~-2-(1-n-Propylpyrazol-4-yl)-4,4,5,5-tetramethylimidazoline-3-oxide-1-oxyl-N,O)-octakis(hexafluoroacetylacetonato-O,O')-tetra-copper(ii)).	1:1	2	1	κ1	M1	2	none	pyrazol, acetylacetonato	increases connectivity	heterocyclic N-oxide and co-ligand	A*M1	A*B01)2*M1	A*B2*B01)2	0D	1D	1	none	1,2M3-1	2C1
LUPPIV05	M.Fedin,S.Veber,I.Gromov,K.Maryunina,S.Fokin,G.Romanenko,R.Sagdeev,V.Ovcharenko,E.Bagryanskaya INORG.CHEM.,2007,46,11405	catena-(tetrakis(\m~2~-2-(1-n-Propylpyrazol-4-yl)-4,4,5,5-tetramethylimidazoline-3-oxide-1-oxyl-N,O)-octakis(hexafluoroacetylacetonato-O,O')-tetra-copper(ii)).	1:1	2	1	κ1	M1	2	none	pyrazol, acetylacetonato	increases connectivity	heterocyclic N-oxide and co-ligand	A*M1	A*B01)2*M1	A*B2*B01)2	0D	1D	1	none	1,2M3-1	2C1
LUPPIV06	M.Fedin,S.Veber,I.Gromov,K.Maryunina,S.Fokin,G.Romanenko,R.Sagdeev,V.Ovcharenko,E.Bagryanskaya INORG.CHEM.,2007,46,11405	catena-(tetrakis(\m~2~-2-(1-n-Propylpyrazol-4-yl)-4,4,5,5-tetramethylimidazoline-3-oxide-1-oxyl-N,O)-octakis(hexafluoroacetylacetonato-O,O')-tetra-copper(ii)).	1:1	2	1	κ1	M1	2	none	pyrazol, acetylacetonato	increases connectivity	heterocyclic N-oxide and co-ligand	A*M1	A*B01)2*M1	A*B2*B01)2	0D	1D	1	none	1,2M3-1	2C1
LUPPIV07	M.Fedin,S.Veber,I.Gromov,K.Maryunina,S.Fokin,G.Romanenko,R.Sagdeev,V.Ovcharenko,E.Bagryanskaya INORG.CHEM.,2007,46,11405	catena-(tetrakis(\m~2~-2-(1-n-Propylpyrazol-4-yl)-4,4,5,5-tetramethylimidazoline-3-oxide-1-oxyl-N,O)-octakis(hexafluoroacetylacetonato-O,O')-tetra-copper(ii)).	1:1	2	1	κ1	M1	2	none	pyrazol, acetylacetonato	increases connectivity	heterocyclic N-oxide and co-ligand	A*M1	A*B01)2*M1	A*B2*B01)2	0D	1D	1	none	1,2M3-1	2C1
LUPPIV08	M.Fedin,S.Veber,I.Gromov,K.Maryunina,S.Fokin,G.Romanenko,R.Sagdeev,V.Ovcharenko,E.Bagryanskaya INORG.CHEM.,2007,46,11405	catena-(tetrakis(\m~2~-2-(1-n-Propylpyrazol-4-yl)-4,4,5,5-tetramethylimidazoline-3-oxide-1-oxyl-N,O)-octakis(hexafluoroacetylacetonato-O,O')-tetra-copper(ii)).	1:1	2	1	κ1	M1	2	none	pyrazol, acetylacetonato	increases connectivity	heterocyclic N-oxide and co-ligand	A*M1	A*B01)2*M1	A*B2*B01)2	0D	1D	1	none	1,2M3-1	2C1
LUPPIV09	M.Fedin,S.Veber,I.Gromov,K.Maryunina,S.Fokin,G.Romanenko,R.Sagdeev,V.Ovcharenko,E.Bagryanskaya INORG.CHEM.,2007,46,11405	catena-(tetrakis(\m~2~-2-(1-n-Propylpyrazol-4-yl)-4,4,5,5-tetramethylimidazoline-3-oxide-1-oxyl-N,O)-octakis(hexafluoroacetylacetonato-O,O')-tetra-copper(ii)).	1:1	2	1	κ1	M1	2	none	pyrazol, acetylacetonato	increases connectivity	heterocyclic N-oxide and co-ligand	A*M1	A*B01)2*M1	A*B2*B01)2	0D	1D	1	none	1,2M3-1	2C1
LUPPIV10	M.Fedin,S.Veber,I.Gromov,K.Maryunina,S.Fokin,G.Romanenko,R.Sagdeev,V.Ovcharenko,E.Bagryanskaya INORG.CHEM.,2007,46,11405	catena-(tetrakis(\m~2~-2-(1-n-Propylpyrazol-4-yl)-4,4,5,5-tetramethylimidazoline-3-oxide-1-oxyl-N,O)-octakis(hexafluoroacetylacetonato-O,O')-tetra-copper(ii)).	1:1	2	1	κ1	M1	2	none	pyrazol, acetylacetonato	increases connectivity	heterocyclic N-oxide and co-ligand	A*M1	A*B01)2*M1	A*B2*B01)2	0D	1D	1	none	1,2M3-1	2C1
LUPPIV11	M.Fedin,S.Veber,I.Gromov,K.Maryunina,S.Fokin,G.Romanenko,R.Sagdeev,V.Ovcharenko,E.Bagryanskaya INORG.CHEM.,2007,46,11405	catena-(bis(\m~2~-2-(1-n-Propylpyrazol-4-yl)-4,4,5,5-tetramethylimidazoline-3-oxide-1-oxyl-N,O)-tetrakis(hexafluoroacetylacetonato-O,O')-di-copper(ii)).	1:1	2	1	κ1	M1	2	none	pyrazol, acetylacetonato	increases connectivity	heterocyclic N-oxide and co-ligand	A*M1	A*B01)2*M1	A*B2*B01)2	0D	1D	1	none	1,2M3-1	2C1
LUPPIV12	M.Fedin,S.Veber,I.Gromov,K.Maryunina,S.Fokin,G.Romanenko,R.Sagdeev,V.Ovcharenko,E.Bagryanskaya INORG.CHEM.,2007,46,11405	catena-(bis(\m~2~-2-(1-n-Propylpyrazol-4-yl)-4,4,5,5-tetramethylimidazoline-3-oxide-1-oxyl-N,O)-tetrakis(hexafluoroacetylacetonato-O,O')-di-copper(ii)).	1:1	2	1	κ1	M1	2	none	pyrazol, acetylacetonato	increases connectivity	heterocyclic N-oxide and co-ligand	A*M1	A*B01)2*M1	A*B2*B01)2	0D	1D	1	none	1,2M3-1	2C1
LUPPIV13	M.Fedin,S.Veber,I.Gromov,K.Maryunina,S.Fokin,G.Romanenko,R.Sagdeev,V.Ovcharenko,E.Bagryanskaya INORG.CHEM.,2007,46,11405	catena-(bis(\m~2~-2-(1-n-Propylpyrazol-4-yl)-4,4,5,5-tetramethylimidazoline-3-oxide-1-oxyl-N,O)-tetrakis(hexafluoroacetylacetonato-O,O')-di-copper(ii)).	1:1	2	1	κ1	M1	2	none	pyrazol, acetylacetonato	increases connectivity	heterocyclic N-oxide and co-ligand	A*M1	A*B01)2*M1	A*B2*B01)2	0D	1D	1	none	1,2M3-1	2C1
LUPPIV14	M.Fedin,S.Veber,I.Gromov,K.Maryunina,S.Fokin,G.Romanenko,R.Sagdeev,V.Ovcharenko,E.Bagryanskaya INORG.CHEM.,2007,46,11405	catena-(bis(\m~2~-2-(1-n-Propylpyrazol-4-yl)-4,4,5,5-tetramethylimidazoline-3-oxide-1-oxyl-N,O)-tetrakis(hexafluoroacetylacetonato-O,O')-di-copper(ii)).	1:1	2	1	κ1	M1	2	none	pyrazol, acetylacetonato	increases connectivity	heterocyclic N-oxide and co-ligand	A*M1	A*B01)2*M1	A*B2*B01)2	0D	1D	1	none	1,2M3-1	2C1
LUPPIV15	M.V.Fedin,S.L.Veber,K.Yu.Maryunina,G.V.Romanenko,E.A.Suturina,N.P.Gritsan,R.Z.Sagdeev,V.I.Ovcharenko,E.G.Bagryanskaya J.AM.CHEM.SOC.,2010,132,13886	catena-(bis(\m~2~-2-(1-n-propyl-1H-pyrazol-4-yl)-3-oxyl-4,4,5,5-tetramethyl-4, 5-dihydro-1H-imidazole-1-oxide-N',O)-tetrakis(hexafluoroacetylacetonato-O,O')-di-copper(ii)).	2:1	4	2	κ1	B2	2	none	pyrazol, acetylacetonato	increases connectivity	heterocyclic N-oxide and co-ligand	A)2*B2	A)2*B2*B01)4	A)2*K4*B01)4	1D	3D	none	none	2C1	dia; 4/6/c1; sqc6
LUPPIV16	M.V.Fedin,S.L.Veber,E.G.Bagryanskaya,G.V.Romanenko,V.I.Ovcharenko DALTON TRANS.,2015,44,18823	catena-(tetrakis(\m-4,4,5,5-tetramethyl-2-(1-propyl-1H-pyrazol-4-yl)-4,5-dihydro-1H-imidazol-1-oxyl3-oxide)-octakis(1,1,1,5,5,5-hexafluoroacetylacetonato)-tetra-copper(ii)).	1:1	2	1	κ1	M1	2	none	pyrazol, acetylacetonato	increases connectivity	heterocyclic N-oxide and co-ligand	A*M1	A*B01)2*M1	A*B2*B01)2	0D	1D	1	none	1,2M3-1	2C1
LUPPIV17	M.V.Fedin,S.L.Veber,E.G.Bagryanskaya,G.V.Romanenko,V.I.Ovcharenko DALTON TRANS.,2015,44,18823	catena-(tetrakis(\m-4,4,5,5-tetramethyl-2-(1-propyl-1H-pyrazol-4-yl)-4,5-dihydro-1H-imidazol-1-oxyl3-oxide)-octakis(1,1,1,5,5,5-hexafluoroacetylacetonato)-tetra-copper(ii)).	1:1	2	1	κ1	M1	2	none	pyrazol, acetylacetonato	increases connectivity	heterocyclic N-oxide and co-ligand	A*M1	A*B01)2*M1	A*B2*B01)2	0D	1D	1	none	1,2M3-1	2C1
LUPPIV18	M.V.Fedin,S.L.Veber,E.G.Bagryanskaya,G.V.Romanenko,V.I.Ovcharenko DALTON TRANS.,2015,44,18823	catena-(bis(\m-4,4,5,5-tetramethyl-2-(1-propyl-1H-pyrazol-4-yl)-4,5-dihydro-1H-imidazol-1-oxyl3-oxide)-tetrakis(1,1,1,5,5,5-hexafluoroacetylacetonato)-di-copper(ii)).	1:1	2	1	κ1	M1	2	none	pyrazol, acetylacetonato	increases connectivity	heterocyclic N-oxide and co-ligand	A*M1	A*B01)2*M1	A*B2*B01)2	0D	1D	1	none	1,2M3-1	2C1
LUPPIV19	M.V.Fedin,S.L.Veber,E.G.Bagryanskaya,G.V.Romanenko,V.I.Ovcharenko DALTON TRANS.,2015,44,18823	catena-(tetrakis(\m-4,4,5,5-tetramethyl-2-(1-propyl-1H-pyrazol-4-yl)-4,5-dihydro-1H-imidazol-1-oxyl3-oxide)-octakis(1,1,1,5,5,5-hexafluoroacetylacetonato)-tetra-copper(ii)).	1:1	2	1	κ1	M1	2	none	pyrazol, acetylacetonato	increases connectivity	heterocyclic N-oxide and co-ligand	A*M1	A*B01)2*M1	A*B2*B01)2	0D	1D	1	none	1,2M3-1	2C1
LUPPIV20	M.V.Fedin,S.L.Veber,E.G.Bagryanskaya,G.V.Romanenko,V.I.Ovcharenko DALTON TRANS.,2015,44,18823	catena-(bis(\m-4,4,5,5-tetramethyl-2-(1-propyl-1H-pyrazol-4-yl)-4,5-dihydro-1H-imidazol-1-oxyl3-oxide)-tetrakis(1,1,1,5,5,5-hexafluoroacetylacetonato)-di-copper(ii)).	1:1	2	1	κ1	M1	2	none	pyrazol, acetylacetonato	increases connectivity	heterocyclic N-oxide and co-ligand	A*M1	A*B01)2*M1	A*B2*B01)2	0D	1D	1	none	1,2M3-1	2C1
LUPPIV21	M.V.Fedin,S.L.Veber,E.G.Bagryanskaya,G.V.Romanenko,V.I.Ovcharenko DALTON TRANS.,2015,44,18823	catena-(bis(\m-4,4,5,5-tetramethyl-2-(1-propyl-1H-pyrazol-4-yl)-4,5-dihydro-1H-imidazol-1-oxyl3-oxide)-tetrakis(1,1,1,5,5,5-hexafluoroacetylacetonato)-di-copper(ii)).	1:1	2	1	κ1	M1	2	none	pyrazol, acetylacetonato	increases connectivity	heterocyclic N-oxide and co-ligand	A*M1	A*B01)2*M1	A*B2*B01)2	0D	1D	1	none	1,2M3-1	2C1
LUPPIV22	M.V.Fedin,S.L.Veber,E.G.Bagryanskaya,G.V.Romanenko,V.I.Ovcharenko DALTON TRANS.,2015,44,18823	catena-(bis(\m-4,4,5,5-tetramethyl-2-(1-propyl-1H-pyrazol-4-yl)-4,5-dihydro-1H-imidazol-1-oxyl3-oxide)-tetrakis(1,1,1,5,5,5-hexafluoroacetylacetonato)-di-copper(ii)).	1:1	2	1	κ1	M1	2	none	pyrazol, acetylacetonato	increases connectivity	heterocyclic N-oxide and co-ligand	A*M1	A*B01)2*M1	A*B2*B01)2	0D	1D	1	none	1,2M3-1	2C1
LUTOCU10	R.S.Sager,W.H.Watson INORG.CHEM.,1969,8,308	Dichloro-bis(2,6-lutidine-N-oxide)-copper(ii).	1:2	1	1	κ1	M1	2	none	chloro	terminal	co-ligand	A*M1)2	A*M1)2	A*M1)4	0D	0D	1	1	1,2M3-1	1,4M5-1
LUZHIX	A.Nedelcu,Z.Zak,A.M.Madalan,J.Pinkas,M.Andruh POLYHEDRON,2003,22,789	catena-((\m~2~-4,4'-Bipyridine-N,N'-dioxide-O,O')-aqua-bis(dicyanamido)-copper(ii)).	1:1	2	2	κ1	B2	2	none	dicyanamid, water	terminal	co-ligand	A*B2	A*M1)3	A*B2*M1)3	1D	1D	none	none	2C1	2C1
MAVFOE	Yun-Ho Chung,Ho-Hsiang Wei Inorg.Chem.Commun.,1999,2,269	catena-(tetrakis(\m~2~-Trimethylacetato)-(\m~2~-2-(3-pyridyl)-4,4,5,5-tetramethyl-4,5-dihydro-1H-imidazolyl-1-oxyl 3-oxide)-di-copper(ii)). catena-(tetrakis(mu!2$-Trimethylacetato)-(mu!2$-3-pyridyl nitronylnitroxide)-di-copper(ii)).	2:1	2	1	κ1	M1	1	none	pyridin, carboxylate	increases connectivity	heterocyclic N-oxide and co-ligand	A)2*M1	A)2*B2)4*M1	A)2*B2)5	0D	1D	1	none	1M2-1	2,2,5C3
MEGNAQ	Li-Zhuang CHEN,Qi-Jian PAN,Deng-Deng HUANG,Xing-Xing CAO J.Coord.Chem.,2015,68,1664	catena-[bis(\m-2-(1-oxo-pyridin-4-yl)imidazol-1-yl-4,5-dicarboxylato)-diaqua-tri-copper(ii) pentahydrate].	3:2	1	1	κ1	M1	2	none	imidazole, carboxylate, water	increases connectivity	heterocyclic N-oxide and co-ligand	A)3*M1)2	A)3*G03)2*M1)2	A)3*H13)2*M1)2	0D	3D	1	none	1,2M3-1	stb-4,4-C2/c
MIKJUN	Guo-Li Zheng,Guo-Cheng Yang,Shu-Yan Song,Xue-Zhi Song,Hong-Jie Zhang CRYSTENGCOMM,2014,16,64	catena-(tetrakis(\m~2~-4,4'-Bipyridine-N,N'-dioxide)-tetra-aqua-di-copper(ii)bis(diaqua-bis(2,2'-bipyridine-N,N'-dioxide)-copper(ii)) bis(hydrogen25,26,27,28-tetrahydroxycalix(4)arene-5,11,17,23-tetrasulfonate)hexadecahydrate).	1:2	2	2	κ1	B01, B2	4	none	water	increases connectivity	co-ligand	A)3*B2)4*B01)2	A*M1)2	A)3*B2)4*B01)2*M1)6	2D|0D	2D	1	none	2,4L2(sql)|1,2M3-1	sql|1,4M5-1
MIQHIE	Ming-yan Wu,Da-qiang Yuan,Bai-quan Chen,You-gui Huang,Feilong Jiang,Mao-chun Hong SUPRAMOL.CHEM.,2007,19,411	bis(\m~2~-Pyridine N-oxide-O,O)-bis(17,23-bis(hydrogensulfonate)-5,11-bis(sulfonato)-25,26,27,28-tetrahydroxy-2,8,14,20-tetrathiacalix(4)arene-O)-hexa-aqua-di-copper(ii) hydrate.	1:1	1	1	κ2	M2	2	2-c N2O2Cu2	water, sulfonato	terminal	co-ligand	A*M2	A*M1)4	A*M2*M1)4	0D	0D	2	2	2M4-1	1,2,6M12-1
MISGOL	M.Indrani,R.Ramasubramanian,S.Kumaresan,Mao-Lin Hu,M.Soriano-Garcia ACTA CRYSTALLOGR.,SECT.C:CRYST.STRUCT.COMMUN.,2008,64,m23	catena-[(\m~2~-3-(2-Pyridylsulfanyl)propionatoN-oxide-\k^3^O^3^:O^1^,O^1'^)-aqua-(3-(2-pyridylsulfanyl)propionatoN-oxide-\kO^1^)-copper(ii) dihydrate].	1:1	1	1	κ1	M1, 0D	1	none	water, carboxylate	increases connectivity	heterocyclic N-oxide and co-ligand	A*M1	A*B01*M1)2	A*T11*M1)2	0D	1D	1	none	1M2-1	2C1
MITHON	E.Deiters,V.Bulach,M.W.Hosseini New J.Chem.,2008,32,99	catena-(bis(\m~3~-5,10-bis(4-PyridineN-oxide)-15,20-diphenylporphyrinato)-chloro-tri-copper(ii) tetrafluoroboratechloroform methanol solvate).	3:2	2	2	κ1	B2	4	none	porphyrin	increases connectivity	heterocyclic N-oxide and co-ligand	A)3*B2)2	A)3*K0001)2*M1	A)3*G2001)2*M1	1D	1D	none	none	2,4C4	2,4C4
MITJEF	E.Deiters,V.Bulach,M.W.Hosseini New J.Chem.,2008,32,99	catena-(bis(\m~3~-5,10-bis(4-PyridineN-oxide-O)-15,20-diphenylporphyrinato)-tri-copper(ii) tribromocuprate bromidetrihydrate).	5:2	2	2	κ2, κ1	B3	4	4-c N4O4Cu3	porphyrin, bromide	increases connectivity	heterocyclic N-oxide and co-ligand	A)5*B3)2	A)5*K0001)2*M2)2*M1)2	A)5*G3001)2*M2)2*M1)2	1D	2D	none	none	1,3,4-c net new1 (2,4C4)	bex; 3,4L13
MOGHOF	Qi-Hua Zhao,Dai-Zheng Liao,Zong-Hui Jiang,Shi-Ping Yan,Song Gao,Bai-Wang Sun J.Coord.Chem.,2002,55,293	Dichloro-bis(2-(4-methylphenyl)-4,4,5,5-tetramethylimidazoline-1-oxyl-3-oxide)-copper(ii).	1:2	2	1	κ1	M1	2	none	chloro	terminal	co-ligand	A*M1)2	A*M1)2	A*M1)4	0D	0D	1	1	1,2M3-1	1,4M5-1
MOPVIW	De-Zhong Niu,Zai-Sheng Lu,Bai-Wang Sun,Bao-Lin Song Jiegou Huaxue(Chin.)(Chin.J.Struct.Chem.),2001,20,270	bis((\m~2~-2-Aminopyridine N-oxide)-(2-aminopyridineN-oxide)-dichloro-copper(ii)) dihydrate.	1:2	1	1	κ2, κ1	M2, M1	3	4-c N4O4Cu2	chloro	terminal	co-ligand	A*M2*M1	A*M1)2	A*M2*M1)3	0D	0D	2	2	1,2,3M6-1	1,2,5M10-1
MPYOCU10	N.R.Stemple,W.H.Watson CRYST.STRUCT.COMMUN.,1975,4,355	Dichloro-bis(2-methylpyrazine di-N-oxide) copper(ii).	1:2	2	2	κ1	B2	4	none	chloro	terminal	co-ligand	A*B2)2	A*M1)2	A*B2)2*M1)2	2D	2D	none	none	2,4L2(sql)	sql
MUSDEK	R.Sarma,A.K.Boudalis,J.B.Baruah INORG.CHIM.ACTA,2010,363,2279	catena-((\m~2~-2,2'-Bipyridyl-N,N'-dioxide)-tetrakis(\m~2~-benzoato)-di-copper).	2:1	2	2	κ1	B2	1	none	carboxylate	increases connectivity	co-ligand	A)2*B2	A*B2)2	A)2*B2)5	0D	1D	1	none	1,2M3-1	2,2,5C3
MUSDIO	R.Sarma,A.K.Boudalis,J.B.Baruah INORG.CHIM.ACTA,2010,363,2279	tetrakis(\m~2~-2-Nitrobenzoato-O,O')-bis(1\l^5^-pyridin-1-olato)-di-copper(ii).	1:1	1	1	κ1	M1	1	none	carboxylate	increases connectivity	co-ligand	A*M1	A*B2)2	A*B2)2*M1	0D	0D	1	2	1M2-1	1,2,5M8-2
MUSDOU	R.Sarma,A.K.Boudalis,J.B.Baruah INORG.CHIM.ACTA,2010,363,2279	catena-((\m~2~-4,4'-Bipyridyl-N,N'-dioxide)-tetrakis(\m~2~-benzoato)-di-copper(ii)).	2:1	2	2	κ1	B2	1	none	carboxylate	increases connectivity	co-ligand	A)2*B2	A*B2)2	A)2*B2)5	0D	1D	1	none	1,2M3-1	2,2,5C3
MUSDUA	R.Sarma,A.K.Boudalis,J.B.Baruah INORG.CHIM.ACTA,2010,363,2279	catena-((\m~2~-4,4'-Bipyridyl-N,N'-dioxide)-aqua-bis(4-hydroxybenzoato)-copper(ii)).	1:1	2	2	κ1	B2	2	none	water, carboxylate	terminal	co-ligand	A*B2	A*M1)3	A*B2*M1)3	1D	1D	none	none	2C1	2C1
MXPOCU	Watson W.H.,Stemple N.R.,Mercer L.F.,Beal G. CRYST.STRUCT.COMMUN.,1975,4,31	Di-\m-(4-methoxypyridine-1-oxide)-bis(dinitrato-copper(ii)).	1:2	1	1	κ2, κ1	M2, M1	3	4-c N4O4Cu2	nitrato	terminal	co-ligand	A*M2*M1	A*B01)2	A*B01)2*M2*M1	0D	0D	2	2	1,2,3M6-1	1,2,5M10-1
NAVVUB	T.V.Rybalova,Yu.V.Gatilov,V.A.Reznikov,N.V.Pervukhina,A.B.Burdukov Zh.Strukt.Khim.(Russ.)(J.Struct.Chem.),1997,38,775	catena-(\m~2~-3-(5,5-Dimethyl-4-oxo-1-oxy-2-phenylpyrrolin-3-ylidene)-5,5-dimethyl-4-oxo-1-oxy-phenylpyrroline) bis(trifluoroacetylacetonato)-copper(ii).	1:1	2	2	κ1	B2	2	none	acetylacetonato	terminal	co-ligand	A*B2	A*B01)2	A*B2*B01)2	1D	1D	none	none	2C1	2C1
NAYTEN	Jing-Min Shi,Ju-Na Chen,Chang-Ju Wu,Lian-Dong Liu ACTA CRYSTALLOGR.,SECT.E:STRUCT.REP.ONLINE,2005,61,m2621	tetrakis(4-Nitropyridine N-oxide-O)-bis(perchlorato-O)-copper(ii).	1:4	1	1	κ1	M1	4	none	perchlorato	terminal	co-ligand	A*M1)4	A*M1)2	A*M1)6	0D	0D	1	1	1,4M5-1	1,6M7-1
NAYTEN01	M.M.Turnbull,C.P.Landee CSD Communication(Private Communication),2019,	tetrakis(4-nitropyridine N-oxide)-bis(perchlorato)-copper(ii).	1:4	1	1	κ1	M1	4	none	perchlorato	terminal	co-ligand	A*M1)4	A*M1)2	A*M1)6	0D	0D	1	1	1,4M5-1	1,6M7-1
NENXIO	Zheng He,Zhe-Ming Wang,Song Gao,Chun-Hua Yan INORG.CHEM.,2006,45,6694	catena-((\m~4~-Isonicotinate N-oxide-O,O,O',O'')-(\m~2~-azido-N,N)-copperhemihydrate).	1:1	1	1	κ2	M2	2	1D CuON	carboxylate, azido	increases connectivity	heterocyclic N-oxide and co-ligand	A*M2	A*B2*M2	A*T4*M2	1D	3D	none	none	2C1	bpq; seh-4,6-Imma
NENXOU	Zheng He,Zhe-Ming Wang,Song Gao,Chun-Hua Yan INORG.CHEM.,2006,45,6694	catena-(bis(\m~3~-Nicotinato N-oxide-O,O',O'')-bis(\m~2~-azido-N,N)-di-coppermonohydrate).	1:1	1	1	κ1	M1	1	none	carboxylate, azido	increases connectivity	heterocyclic N-oxide and co-ligand	A*M1	A*B2*M2	A*T3*M2	0D	2D	1	none	1M2-1	gek1
NERLAX	Bao-Qing Ma,Hao-Ling Sun,Song Gao,Guang-Xian Xu INORG.CHEM.,2001,40,6247	hexakis(4,4'-Bipyridine-N,N'-dioxide-O)-copper(ii) diperchlorate.	1:6	2	1	κ1	M1	6	none	none	none	none	A*M1)6	none	A*M1)6	0D	0D	1	1	1,6M7-1	1,6M7-1
NERLEB	Bao-Qing Ma,Hao-Ling Sun,Song Gao,Guang-Xian Xu INORG.CHEM.,2001,40,6247	catena-(tetrakis((\m~2~-4,4'-Bipyridine-N,N'-dioxide-O,O')-hexa-aqua-(4,4'-bipyridine-N,N'-dioxide-O))-tri-copper(ii) hexaperchlorate4,4'-bipyridine-N,N'-dioxide solvate hexahydrate).	3:8	2	2, 1	κ1	B2, M1, 0D	4	none	water	terminal	co-ligand	A)3*B2)4*M1)4	A*M1)2	A)3*B2)4*M1)10	2D	2D	none	none	1,1,2,2,4,4-c net new2 (hcb)	hcb
NERLOL	Bao-Qing Ma,Hao-Ling Sun,Song Gao,Guang-Xian Xu INORG.CHEM.,2001,40,6247	catena-((\m~2~-4,4'-Bipyridine-N,N')-(\m~2~-4,4'-bipyridine-N,N'-dioxide-O,O')-copper(ii) diperchlorate N,N'-bipyridine-N,N'-dioxide dihydrate).	1:1	2	2	κ1	B2, 0D	2	none	pyridin, water	increases connectivity	co-ligand	A*B2	A*B2*M1)2	A*B2)2*M1)2	1D	2D	none	none	2C1	sql
NICTCU	H.Knuuttila INORG.CHIM.ACTA,1981,50,221	catena-(Diaqua-bis(\m~2~-hydroxo)-bis(\m~2~-nicotinato-N-oxide)-bis(\m~2~-nicotinato-N-oxido)-tri-copper(ii)).	3:2	1	1	κ2	M2, 0D	2, 1	2-c N2O2Cu3	water, carboxylate, hydroxo	increases connectivity	heterocyclic N-oxide and co-ligand	A)3*M2)2	A)3*B2)2*M2)2*M1)4	A)3*B3)2*B2)2*M2)2*M1)2	0D	1D	3	none	1,2,2M5-1	2,3,4,6C3
NICTCU01	Yi-Fan Kang,Yun-Luo Wang,Li Xu,Wen-Qian Zhang,L.-L.Cuo,Yang-Min Ma J.SOLID STATE CHEM.,2020,291,121620	catena-[tetrakis(\m-1-oxido-pyridine-3-carboxylato)-bis(\m-hydroxo)-diaqua-tri-copper].	3:2	1	1	κ2	M2, 0D	2, 1	2-c N2O2Cu3	water, carboxylate, hydroxo	increases connectivity	heterocyclic N-oxide and co-ligand	A)3*M2)2	A)3*B2)2*M2)2*M1)4	A)3*B3)2*B2)2*M2)2*M1)2	0D	1D	3	none	1,2,2M5-1	2,3,4,6C3
NICTCU02	M.Mirzaei,M.Bazargan,P.Ebtehaj,J.T.Mague Acta Crystallogr.,Sect.E:Cryst.Commun.,2021,77,309	catena-[tetrakis(\m-1-oxido-pyridine-3-carboxylato)-bis(\m-hydroxo)-diaqua-tri-copper(ii)]. catena-(Diaqua-bis(mu!2$-hydroxo)-bis(mu!2$-nicotinato-N-oxide)-bis(mu!2$-nicotinato-N-oxido)-tri-copper(ii)).	3:2	1	1	κ2	M2, 0D	2, 1	2-c N2O2Cu3	water, carboxylate, hydroxo	increases connectivity	heterocyclic N-oxide and co-ligand	A)3*M2)2	A)3*B2)2*M2)2*M1)4	A)3*B3)2*B2)2*M2)2*M1)2	0D	1D	3	none	1,2,2M5-1	2,3,4,6C3
NIQZEV	Juan Sun,Lu Xi,Jing Xie,Kang Wang,Licun Li,J.-P.Sutter DALTON TRANS.,2018,47,14630	catena-[tris(\m-2-[3,5-bis(1-imidazole)-phenyl]-4,4,5,5-tetramethylimidazoline-1-oxyl-3-oxide)-tetradecakis(1,1,1,5,5,5-hexafluoroacetylacetonato)-hepta-copper(ii) unknown solvate].	7:3	2	2	κ1	B2	2, 1	none	imidazole, acetylacetonato	increases connectivity	heterocyclic N-oxide and co-ligand	A)7*B2)3	A)7*B2)3*B01)14	A)7*K4)3*B01)14	0D|0D	3D	3, 2, 0	none	1,2,2M5-1|1,2M3-1	tfi; sqc515
NIZQOE	Furui T.,Shuichi SUZUKI,Kozaki M.,Shiomi D.,Sato K.,Takui T.,Okada K.,Tretyakov E.V.,Tolstikov S.E.,Romanenko G.V.,Ovcharenko V.I. INORG.CHEM.,2014,53,802	catena-[bis(\m~3~-N-t-butyl-N-oxidanide-2-amino(iminonitroxide))-tetrakis(1,1, 1,5,5,5-hexafluoroacetylacetonato)-tri-copper].	3:2	2	2	κ2, κ1	B3	2	2-c N2O2Cu2	acetylacetonato, iminonitroxide	increases connectivity	heterocyclic N-oxide and co-ligand	A)3*B3)2	A*B01)2	A)3*T21)2*B01)4	1D	1D	none	none	2,2,3C6	2C1
NONWUJ	Yan-Yan Xu,Jian-Guo Lin,Jing Yao,Song Gao,Hui-Zhen Zhu,Qing-Jin Meng Inorg.Chem.Commun.,2008,11,1422	catena((\m~4~-5-Carboxypyridine-3-carboxylato N-oxide)-aqua-copper(ii)).	1:1	1	1	κ1	M1	1	none	water, carboxylate	increases connectivity	heterocyclic N-oxide and co-ligand	A*M1	A*T3*M1	A*K4*M1	0D	3D	1	none	1M2-1	nia-4,4-Pbca
OFEJIS	M.J.Plater,M.R.St.J.Foreman,A.M.Z.Slawin INORG.CHIM.ACTA,2000,303,132	catena-(trans-(4,4'-Bipyridine-N,N'-dioxide)-bis(hexafluoroacetylacetonato)-copper(ii)).	1:1	2	2	κ1	B2	2	none	acetylacetonato	terminal	co-ligand	A*B2	A*B01)2	A*B2*B01)2	1D	1D	none	none	2C1	2C1
OQIXUK	T.Sherstobitova,K.Maryunina,S.Tolstikov,G.Letyagin,G.Romanenko,S.Nishihara,K.Inoue ACS Omega,2019,4,17160	bis([2-(2-bromopyridin-3-yl)-4,4,5,5-tetramethyl-3-oxo-4,5-dihydro-1H-imidazol-1-yl]oxidanyl radical)-bis(1,1,1,5,5,5-hexafluoroacetylacetonato)-copper(ii)bis(aqua-bis(1,1,1,5,5,5-hexafluoroacetylacetonato)-copper(ii)).	3:1	2	1	κ1	M1	2	none	acetylacetonato, water	terminal	co-ligand	A)3*M1)2	A)3*B01)6*M1)2	A)3*B01)6*M1)4	0D	0D	1	1	1,2M3-1	1,3M4-1|1,4M5-1
OQIYAR	T.Sherstobitova,K.Maryunina,S.Tolstikov,G.Letyagin,G.Romanenko,S.Nishihara,K.Inoue ACS Omega,2019,4,17160	bis([2-(2-bromopyridin-3-yl)-4,4,5,5-tetramethyl-3-oxo-4,5-dihydro-1H-imidazol-1-yl]oxidanyl radical)-bis(1,1,1,5,5,5-hexafluoroacetylacetonato)-copper(ii)diaqua-bis(1,1,1,5,5,5-hexafluoroacetylacetonato)-copper(ii).	1:1	2	1	κ1	M1	2	none	acetylacetonato, water	terminal	co-ligand	A*M1	A*B01)2*M1	A*B01)2*M1)2	0D	0D	1	1	1,2M3-1	1,4M5-1
OQIYEV	T.Sherstobitova,K.Maryunina,S.Tolstikov,G.Letyagin,G.Romanenko,S.Nishihara,K.Inoue ACS Omega,2019,4,17160	tetrakis(\m-[4,4,5,5-tetramethyl-2-(2-methylpyridin-3-yl)-3-oxo-4,5-dihydro-1H-imidazol-1-yl]oxidanylradical)-decakis(1,1,1,5,5,5-hexafluoroacetylacetonato)-penta-copper(ii).	5:4	2	1	κ1	M1	2, 1	none	pyridin, acetylacetonato	increases connectivity	heterocyclic N-oxide and co-ligand	A)5*M1)4	A)5*B01)10*M1)4	A)5*B2)4*B01)10	0D|0D	0D	1	5	1,2M3-1|1M2-1	1,1,1,2,2,3,4,4M17-X new
OQOKAJ	T.Sherstobitova,K.Maryunina,S.Tolstikov,G.Letyagin,G.Romanenko,S.Nishihara,K.Inoue ACS Omega,2019,4,17160	bis(\m-[4,4,5,5-tetramethyl-2-(2-methylpyridin-3-yl)-3-oxo-4,5-dihydro-1H-imidazol-1-yl]oxidanylradical)-decakis(1,1,1,5,5,5-hexafluoroacetylacetonato)-penta-copper(ii).	5:2	2	2	κ1	B2	2, 1	none	pyridin, acetylacetonato	increases connectivity	heterocyclic N-oxide and co-ligand	A)5*B2)2	A)5*B01)10*M1)2	A)5*T3)2*B01)10	0D	0D	3, 1	5	1,2,2M5-1	1,1,3,3,4M19-X new
OQOKOX	T.Sherstobitova,K.Maryunina,S.Tolstikov,G.Letyagin,G.Romanenko,S.Nishihara,K.Inoue ACS Omega,2019,4,17160	(\m-[4,4,5,5-tetramethyl-2-(2-methylpyridin-3-yl)-3-oxo-4,5-dihydro-1H-imidazol-1-yl]oxidanylradical)-aqua-tetrakis(1,1,1,5,5,5-hexafluoroacetylacetonato)-di-copper(ii).	2:1	2	1	κ1	M1	1	none	pyridin, acetylacetonato, water	increases connectivity	heterocyclic N-oxide and co-ligand	A)2*M1	A*B01)2*M1	A)2*B2*B01)4*M1	0D	0D	1	2	1M2-1	1,1,2,3,4M8-2
OQOKUD	T.Sherstobitova,K.Maryunina,S.Tolstikov,G.Letyagin,G.Romanenko,S.Nishihara,K.Inoue ACS Omega,2019,4,17160	catena-[bis(\m-[2-(2-bromopyridin-3-yl)-4,4,5,5-tetramethyl-3-oxo-4,5-dihydro-1H-imidazol-1-yl]oxidanylradical)-tetrakis(1,1,1,5,5,5-hexafluoroacetylacetonato)-di-copper(ii)].	1:1	2	2	κ1	B2	2	none	acetylacetonato	terminal	co-ligand	A*B2	A*B01)2	A*B2*B01)2	1D	1D	none	none	2C1	2C1
OQOLAK	T.Sherstobitova,K.Maryunina,S.Tolstikov,G.Letyagin,G.Romanenko,S.Nishihara,K.Inoue ACS Omega,2019,4,17160	bis([2-(6-bromopyridin-3-yl)-4,4,5,5-tetramethyl-3-oxo-4,5-dihydro-1H-imidazol-1-yl]oxidanyl radical)-bis(1,1,1,5,5,5-hexafluoroacetylacetonato)-copper(ii)bis(1,1,1,5,5,5-hexafluoroacetylacetonato)-copper(ii).	1:1	2	1	κ1	M1	2	none	acetylacetonato	terminal	co-ligand	A*M1	A*B01)2	A*B01)2*M1	0D	0D	1	1	1,2M3-1	1,4M5-1|1,2M3-1
OQOLEO	T.Sherstobitova,K.Maryunina,S.Tolstikov,G.Letyagin,G.Romanenko,S.Nishihara,K.Inoue ACS Omega,2019,4,17160	bis(\m-[2-(6-bromopyridin-3-yl)-4,4,5,5-tetramethyl-3-oxo-4,5-dihydro-1H-imidazol-1-yl]oxidanylradical)-hexakis(1,1,1,5,5,5-hexafluoroacetylacetonato)-tri-copper(ii).	3:2	2	2	κ1	B2	2, 1	none	acetylacetonato	terminal	co-ligand	A)3*B2)2	A*B01)2	A)3*B2)2*B01)6	0D	0D	3	3	1,2,2M5-1	1,1,2,3,4M11-1
OYEMEL	E.V.Tretyakov,I.A.Utepova,M.V.Varaksin,S.E.Tolstikov,G.V.Romanenko,A.S.Bogomyakov,D.V.Stass,V.I.Ovcharenko,O.N.Chupakhin ARKIVOC,2011,2012,76-8	bis(\m~2~-2-(2-Ethynylcyclopropyl)-4,4,5,5-tetramethyl-4,5-dihydro-1H-imidazol-3-oxide-1-oxyl)-hexakis(1,1,1,5,5,5-hexafluoroacetylacetonato)-tri-coppern-heptane solvate.	3:2	2	2	κ1	B2	2, 1	none	acetylacetonato	terminal	co-ligand	A)3*B2)2	A*B01)2	A)3*B2)2*B01)6	0D	0D	3	3	1,2,2M5-1	1,1,2,3,4M11-1
OZUTUZ	V.I.Ovcharenko,S.V.Fokin,E.Yu.Fursova,O.V.Kuznetsova,E.V.Tretyakov,G.V.Romanenko,A.S.Bogomyakov INORG.CHEM.,2011,50,4307	catena-[tetrakis(\m~2~-Pivalato-O,O')-bis(\m~2~-4,4,5,5-tetramethyl-2-(1-methyl-1H-imidazol-5-yl)-4,5-dihydro-1H-imidazole-3-oxide-1-oxylradical-N,O)-bis(hexafluoroacetylacetonato-O,O')-tri-copper toluene solvate].	3:2	2	1	κ1	M1	1	none	imidazole, acetylacetonato	increases connectivity	heterocyclic N-oxide and co-ligand	A)3*M1)2	A)3*B2)4*B01)2*M1)2	A)3*B2)6*B01)2	0D	1D	1	none	1M2-1	2,2,2,5C2
PEBCII	A.Caneschi,D.Gatteschi,R.Sessoli,P.Rey,C.I.Cabello J.MATER.CHEM.,1992,2,1283	catena-(bis(\m~2~-1-Oxido-3-oxo-2-propyl-4,4,5,5-tetramethyl-4,5-dihydro-1H-imidazol-3-ium-1-yl)-tetrakis(hexafluoroacetylacetonato-O,O')-di-copper).	1:1	2	2	κ1	B2	2	none	acetylacetonato	terminal	co-ligand	A*B2	A*B01)2	A*B2*B01)2	1D	1D	none	none	2C1	2C1
PEQSAG	Jing-Min Shi,Feng-Xia Zhang,Chang-Ju Wu,Lian-Dong Liu,Long Yi TRANSITION MET.CHEM.,2006,31,879	catena-[(\m~2~-2,5-Dimethylpyrazine-1,4-dioxide)-bis(2,5-dimethylpryazine-1,4-dioxide)-copper(ii) diperchlorate].	1:3	2	2, 1	κ1	B2, M1	4	none	none	none	none	A*B2*M1)2	none	A*B2*M1)2	1D	1D	none	none	1,2,4-c net new3 (2C1)	2C1
PHPYOC	W.H.Watson,D.R.Johnson J.Coord.Chem.,1971,1,145	bis(\m~2~-4-Phenylpyridine-1-oxido)-tetrachloro-di-copper(ii) monohydrate.	1:1	1	1	κ2	M2	2	2-c N2O2Cu2	chloro	terminal	co-ligand	A*M2	A)2*M1)5	A)2*M2)2*M1)5	0D	0D	2	2	2M4-1	1,2,5M10-1|1,2,4M8-3
PICKOD	Ya-Li WANG,Yuan-Yuan GAO,Ming-Fang YANG,Tao GAO,Yue MA,Qing-Lun WANG,Dai-Zheng LIAO POLYHEDRON,2013,61,105	bis(4,4,5,5-Tetramethyl-2-(3-nitrophenyl)-4,5-dihydro-1H-3\l^5^-imidazole-1,3-diol)-bis(hexafluoroacetylacetonato)-copper.	1:2	2	1	κ1	M1	2	none	acetylacetonato	terminal	co-ligand	A*M1)2	A*B01)2	A*B01)2*M1)2	0D	0D	1	1	1,2M3-1	1,4M5-1
PICROK	Ya-Li Wang,Yuan-Yuan Gao,Ming-Fang Yang,Tao Gao,Yue Ma,Qing-Lun Wang,Dai-Zheng Liao POLYHEDRON,2013,61,105	bis(\m~2~-2-(3-Bromo-4-methoxyphenyl)-4,4,5,5-tetramethyl-4,5-dihydroimidazole-1,3-diolato)-hexakis(hexafluoroacetylacetonato-O,O')-tri-copper.	3:2	2	2	κ1	B2	2, 1	none	acetylacetonato	terminal	co-ligand	A)3*B2)2	A*B01)2	A)3*B2)2*B01)6	0D	0D	3	3	1,2,2M5-1	1,1,2,3,4M11-1
PIJDUH	Y.Le Fur,J.Pecaut,J.P.Levy Z.Krist.Cryst.Mater.,1993,208,255	bis(4-Methoxypyridine-N-oxide)-dichloro-copper(ii).	1:2	1	1	κ1	M1	2	none	chloro	terminal	co-ligand	A*M1)2	A*M1)2	A*M1)4	0D	0D	1	1	1,2M3-1	1,4M5-1
PIJSIL	Jiang-Bo She,Guo-Fang Zhang,Feng-Qi Zhao,Zhong-Li Lei,Xue-Zhong Fan Struct.Chem.,2007,18,373	tetra-aqua-(3,5-dinitro-4-pyridone-N-hydroxylate)-copper(ii).	1:2	1	1	κ1	M1	2	none	water	terminal	co-ligand	A*M1)2	A*M1)4	A*M1)6	0D	0D	1	1	1,2M3-1	1,6M7-1
PIOCUA	R.S.Sager,W.H.Watson INORG.CHEM.,1968,7,2035	catena-[tetrakis(\m-chloro)-bis(\m-2-methylpyridin-1-olato)-dichloro-diaqua-tri-copper(ii)]. catena-(tetrakis(mu!2$-Chloro)-bis(mu!2$-2-picolineN-oxide-O,O)-diaqua-dichloro-tri-copper(ii)) copper(ii).	3:2	1	1	κ2	M2	2	2-c N2O2Cu2	chloro	increases connectivity	co-ligand	A)3*M2)2	A)3*M2)2*M1)6	A)3*M2)4*M1)6	0D	1D	2, 1	none	2M4-1	2,2,2,3C2
POCGOD	N.V.Pervukhina,N.V.Podberezskaya Zh.Strukt.Khim.(Russ.)(J.Struct.Chem.),1994,35,141-3	catena-(bis(\m~2~-4-Isopropyl-2,2,5,5-tetramethyl-1-oxyl-3-imidazoline-O,N)-tris(hexafluoroacetylacetonato)-di-copper(i,ii)).	1:1	1	1	κ1	M1	2	none	1-oxyl-3-imidazoline, acetylacetonato	increases connectivity	heterocyclic N-oxide and co-ligand	A*M1	A)2*B01)3*M1)2	A)2*B2)2*B01)3	0D	1D	1	none	1,2M3-1	2C1
POCSCU10	R.J.Williams,W.H.Watson,A.C.Larson ACTA CRYSTALLOGR.,SECT.B:STRUCT.CRYSTALLOGR.CRYST.CHEM.,1975,31,2362	Di-\m-(pyridine oxide)-bis(dichloro-(dimethylsulfoxide)-copper(ii)).	1:1	1	1	κ2	M2	2	2-c N2O2Cu2	chloro, dimethylsulfoxide	terminal	co-ligand	A*M2	A*M1)3	A*M2*M1)3	0D	0D	2	2	2M4-1	1,2,5M10-1
POFBAN	N.V.Pervukhina,N.V.Podberezskaya Zh.Strukt.Khim.(Russ.)(J.Struct.Chem.),1994,35,39-3	bis(\m~2~-2,5,5-Trimethyl-2-ethyl-4-phenyl-3-imidazolin-1-oxyl-N',O)-tris(bis(hexafluoroacetylacetonato)-copper(ii)).	3:1	1	1	κ1	M1	2	none	acetylacetonato, imidazoline	increases connectivity	heterocyclic N-oxide and co-ligand	A)3*M1)2	A)3*B01)6*M1)2	A)3*B2)2*B01)6	0D	0D	1	3	1,2M3-1	1,1,2,3,4M11-1
POFBER	N.V.Pervukhina,N.V.Podberezskaya Zh.Strukt.Khim.(Russ.)(J.Struct.Chem.),1994,35,39-3	bis(\m~2~-2,2-Dimethyl-4-phenyl-5,5-dimethoxy-3-imidazolin-1-oxyl-N',O)-tris(bis(hexafluoroacetylacetonato)-copper(ii)).	3:1	1	1	κ1	M1	2	none	acetylacetonato, imidazoline	increases connectivity	heterocyclic N-oxide and co-ligand	A)3*M1)2	A)3*B01)6*M1)2	A)3*B2)2*B01)6	0D	0D	1	3	1,2M3-1	1,1,2,3,4M11-1
POWRAV	Yue Cui,Qian Gao,Chao-Yan Zhang,Ya-Bo Xie ACTA CRYSTALLOGR.,SECT.E:STRUCT.REP.ONLINE,2009,65,m850	tetrakis(\m~2~-Acetato)-bis(pyridine N-oxide)-di-copper(ii).	1:1	1	1	κ1	M1	1	none	carboxylate	increases connectivity	co-ligand	A*M1	A*B2)2	A*B2)2*M1	0D	0D	1	2	1M2-1	1,2,5M8-2
PYOCDB	J.E.Whinnery,W.H.Watson J.Coord.Chem.,1972,1,207	bis(\m~2~-Pyridine-N-oxide)-tetrabromo-di-copper.	1:1	1	1	κ2	M2	2	2-c N2O2Cu2	bromo	terminal	co-ligand	A*M2	A*M1)2	A*M2*M1)2	0D	0D	2	2	2M4-1	1,2,4M8-3
PYOCDB01	You-Min Sun,Pei-Gang Li,Jing-Min Shi J.Coord.Chem.,2009,62,1725	bis(\m~2~-pyridine N-oxide)-tetrabromo-di-copper(ii).	1:1	1	1	κ2	M2	2	2-c N2O2Cu2	bromo	terminal	co-ligand	A*M2	A*M1)2	A*M2*M1)2	0D	0D	2	2	2M4-1	1,2,4M8-3
PYOCFB10	J.D.Lee,D.S.Brown,B.G.A.Melsom ACTA CRYSTALLOGR.,SECT.B:STRUCT.CRYSTALLOGR.CRYST.CHEM.,1969,25,1595	Tetra(pyridine oxide)-copper(ii) bis(tetrafluoroborate).	1:4	1	1	κ1	M1	4	none	none	none	none	A*M1)4	none	A*M1)4	0D	0D	1	1	1,4M5-1	1,4M5-1
PYOCUA10	R.O.Day,J.S.Wood CRYST.STRUCT.COMMUN.,1981,10,255	hexakis(Pyridine-N-oxide)-copper(ii) dinitrate.	1:6	1	1	κ1	M1	6	none	none	none	none	A*M1)6	none	A*M1)6	0D	0D	1	1	1,6M7-1	1,6M7-1
PYOCUB10	A.D.Mighell,C.W.Reimann,A.Santoro ACTA CRYSTALLOGR.,SECT.B:STRUCT.CRYSTALLOGR.CRYST.CHEM.,1972,28,126	Dibromo-bis(pyridine-N-oxide) copper(ii) dimer.	1:2	1	1	κ2, κ1	M2, M1	3	4-c N4O4Cu2	bromo	terminal	co-ligand	A*M2*M1	A*M1)2	A*M2*M1)3	0D	0D	2	2	1,2,3M6-1	1,2,5M10-1
PYOCUC	C.J.O'Connor,E.Sinn,R.L.Carlin INORG.CHEM.,1977,16,3314	hexakis(Pyridine-N-oxide)-copper(ii) bis(perchlorate).	1:6	1	1	κ1	M1	6	none	none	none	none	A*M1)6	none	A*M1)6	0D	0D	1	1	1,6M7-1	1,6M7-1
PYOCUC01	D.Taylor AUST.J.CHEM.,1978,31,713	hexakis(Pyridine-N-oxide) copper(ii) bis(perchlorate).	1:6	1	1	κ1	M1	6	none	none	none	none	A*M1)6	none	A*M1)6	0D	0D	1	1	1,6M7-1	1,6M7-1
PYOCUD	C.J.O'Connor,E.Sinn,R.L.Carlin INORG.CHEM.,1977,16,3314	hexakis(Pyridine-N-oxide)-copper(ii) bis(tetrafluoroborate).	1:6	1	1	κ1	M1	6	none	none	none	none	A*M1)6	none	A*M1)6	0D	0D	1	1	1,6M7-1	1,6M7-1
PYROCU10	J.D.Lee,D.S.Brown,B.G.A.Melsom ACTA CRYSTALLOGR.,SECT.B:STRUCT.CRYSTALLOGR.CRYST.CHEM.,1969,25,1378	tetrakis(pyridine oxide)-copper(ii) diperchlorate.	1:4	1	1	κ1	M1	4	none	none	none	none	A*M1)4	none	A*M1)4	0D	0D	1	1	1,4M5-1	1,4M5-1
PYROCU11	C.P.Landee,E.Kirkman-Davis,M.I.J.Polson,M.M.Turnbull,J.L.Wikaira J.Coord.Chem.,2020,1	tetrakis(pyridine N-oxide)-copper diperchlorate.	1:4	1	1	κ1	M1	4	none	none	none	none	A*M1)4	none	A*M1)4	0D	0D	1	1	1,4M5-1	1,4M5-1
QANFEQ	A.Cogne,J.Laugier,D.Luneau,P.Rey INORG.CHEM.,2000,39,5510	bis(2-Phenyl-4,4,5,5-tetramethylimidazoline-1-oxyl-3-oxidoradical)-bis(trifluoroacetato-O)-copper(ii).	1:2	2	1	κ1	M1	2	none	carboxylate	terminal	co-ligand	A*M1)2	A*M1)2	A*M1)4	0D	0D	1	1	1,2M3-1	1,4M5-1
QEKTEG	G.A.van Albada,I.Mutikainen,U.Turpeinen,J.Reedijk Inorg.Chem.Commun.,2006,9,441	catena-(bis(\m~2~-Dicyanamido-N,N')-(4-nitropyridine-N-oxide-O)-copper(ii)).	1:1	1	1	κ1	M1	1	none	dicyanamido	increases connectivity	co-ligand	A*M1	A*B2)2	A*B2)2*M1	0D	2D	1	none	1M2-1	hcb
QETLIL	C.Rajadurai,V.Enkelmann,V.Ikorskii,V.I.Ovcharenko,M.Baumgarten INORG.CHEM.,2006,45,9664	catena-(bis(\m~5~-3,5-bis((4,4,5,5-tetramethyl-3-oxylimidazoline-1-oxide)phenylethynyl)pyridine)-tetradecakis(hexafluoroacetylacetonato)-hepta-copper(ii)).	7:2	4	4	κ1	K4	2, 1	none	pyridin, acetylacetonato	increases connectivity	heterocyclic N-oxide and co-ligand	A)7*K4)2	A)7*B01)14*M1)2	A)7*P5)2*B01)14	0D	1D	7	none	1,2,4M9-2	2,2,3C6
QOLWEU	C.Hirel,Licun Li,P.Brough,K.Vostrikova,J.Pecaut,B.Mehdaoui,M.Bernard,P.Turek,P.Rey INORG.CHEM.,2007,46,7545	meso-bis(\m~3~-2-(3-Pyridyl)-4,5-diethyl-4,5-dimethylimidazolinyl-3-oxide-1-oxyl-N,O,O')-octakis(hexafluoroacetylacetonato-O,O')-tetra-copper(ii).	2:1	2	2	κ1	B2	1	none	pyridin, acetylacetonato	increases connectivity	heterocyclic N-oxide and co-ligand	A)2*B2	A)2*B01)4*M1	A)2*T3*B01)4	0D	0D	1	4	1,2M3-1	1,1,3,3,4M14-1
QOLWIY	C.Hirel,Licun Li,P.Brough,K.Vostrikova,J.Pecaut,B.Mehdaoui,M.Bernard,P.Turek,P.Rey INORG.CHEM.,2007,46,7545	rac-bis(\m~3~-2-(3-Pyridyl)-4-ethyl-4,5,5-trimethylimidazolinyl-3-oxide-1-oxyl-N,O,O')-octakis(hexafluoroacetylacetonato-O,O')-tetra-copper(ii).	2:1	2	2	κ1	B2	1	none	pyridin, acetylacetonato	increases connectivity	heterocyclic N-oxide and co-ligand	A)2*B2	A)2*B01)4*M1	A)2*T3*B01)4	0D	0D	1	4	1,2M3-1	1,1,3,3,4M14-1
QOLWOE	C.Hirel,Licun Li,P.Brough,K.Vostrikova,J.Pecaut,B.Mehdaoui,M.Bernard,P.Turek,P.Rey INORG.CHEM.,2007,46,7545	rac-bis(\m~2~-4,4,6,6-Tetramethyl-2-(3-pyridyl)-3,4,5,6-tetrahydropyrimidinyl-3-oxide-1-oxyl-N,O,O')-octakis(hexafluoroacetylacetonato-O,O')-tetra-copper(ii).	2:1	2	2	κ1	B2	1	none	pyridin, acetylacetonato	increases connectivity	heterocyclic N-oxide and co-ligand	A)2*B2	A)2*B01)4*M1	A)2*T3*B01)4	0D	0D	1	4	1,2M3-1	1,1,3,3,4M14-1
QOTXUT	C.Hirel,Licun Li,P.Brough,K.Vostrikova,J.Pecaut,B.Mehdaoui,M.Bernard,P.Turek,P.Rey INORG.CHEM.,2007,46,7545	rac-bis(\m~3~-2-(3-Pyridyl)-4,5-diethyl-4,5-dimethylimidazolinyl-3-oxide-1-oxyl-N,O,O')-octakis(hexafluoroacetylacetonato-O,O')-tetra-copper(ii).	2:1	2	2	κ1	B2	1	none	pyridin, acetylacetonato	increases connectivity	heterocyclic N-oxide and co-ligand	A)2*B2	A)2*B01)4*M1	A)2*T3*B01)4	0D	0D	1	4	1,2M3-1	1,1,3,3,4M14-1
QOVFEN	C.Hirel,Licun Li,P.Brough,K.Vostrikova,J.Pecaut,B.Mehdaoui,M.Bernard,P.Turek,P.Rey INORG.CHEM.,2007,46,7545	rac-bis(\m~3~-2-(3-Pyridyl)-4,5-diethyl-4,5-dimethylimidazolinyl-3-oxide-1-oxyl-N,O,O')-octakis(hexafluoroacetylacetonato-O,O')-tetra-copper(ii).	2:1	2	2	κ1	B2	1	none	pyridin, acetylacetonato	increases connectivity	heterocyclic N-oxide and co-ligand	A)2*B2	A)2*B01)4*M1	A)2*T3*B01)4	0D	0D	1	4	1,2M3-1	1,1,3,3,4M14-1
QUBVAL	Sungjun Hong,A.K.Gupta,W.B.Tolman INORG.CHEM.,2009,48,6323	(4-Chloropyridine1-oxide-O)-(N-(1-(6-(2,6-dimethylphenyl)-2-pyridinyl)ethylidene)-2,6-diisopropylaniline-N,N')-copper(i) trifluoromethanesulfonate.	1:1	1	1	κ1	M1	1	none	pyridin, aniline	terminal	co-ligand	A*M1	A*B01	A*B01*M1	0D	0D	1	1	1M2-1	1,2M3-1
QUBVEP	Sungjun Hong,A.K.Gupta,W.B.Tolman INORG.CHEM.,2009,48,6323	(2,6-Dichloropyridine1-oxide-O)-(N-(1-(6-(2,6-dimethylphenyl)-2-pyridinyl)ethylidene)-2,6-diisopropylaniline-N,N')-copper(i) trifluoromethanesulfonate.	1:1	1	1	κ1	M1	1	none	pyridin, aniline	terminal	co-ligand	A*M1	A*B01	A*B01*M1	0D	0D	1	1	1M2-1	1,2M3-1
QUBVIT	Sungjun Hong,A.K.Gupta,W.B.Tolman INORG.CHEM.,2009,48,6323	(4-Nitropyridine1-oxide-O)-(N-(1-(6-(2,6-dimethylphenyl)-2-pyridinyl)ethylidene)-2,6-diisopropylaniline-N,N')-copper(i) trifluoromethanesulfonate.	1:1	1	1	κ1	M1	1	none	pyridin, aniline	terminal	co-ligand	A*M1	A*B01	A*B01*M1	0D	0D	1	1	1M2-1	1,2M3-1
QUVKAW	Yi-Fan Kang,Yun-Luo Wang,Li Xu,Wen-Qian Zhang,L.-L.Cuo,Yang-Min Ma J.SOLID STATE CHEM.,2020,291,121620	catena-[(\m-1-oxido-pyridine-4-carboxylato)-(\m-hydroxo)-copper].	1:1	1	1	κ2	M2	2	1D CuON	carboxylate, hydroxo	increases connectivity	heterocyclic N-oxide and co-ligand	A*M2	A*B2*M2	A*T4*M2	1D	2D	none	none	2C1	4,6L26
QUVKEA	Yi-Fan Kang,Yun-Luo Wang,Li Xu,Wen-Qian Zhang,L.-L.Cuo,Yang-Min Ma J.SOLID STATE CHEM.,2020,291,121620	catena-[(\m-1-oxido-pyridine-4-carboxylato)-(\m-methoxo)-copper].	1:1	1	1	κ2	M2	2	1D CuON	carboxylate, methoxy	increases connectivity	heterocyclic N-oxide and co-ligand	A*M2	A*B2*M2	A*T4*M2	1D	3D	none	none	2C1	bpq; seh-4,6-Imma
QUXSOS	A.I.Ramos,J.A.Fernandes,P.Silva,P.J.A.Ribeiro-Claro,S.S.Braga,F.A.Almeida Paz ACTA CRYSTALLOGR.,SECT.E:STRUCT.REP.ONLINE,2010,66,m824	bis(\m~2~-4-PhenylpyridineN-oxide-\k^2^O:O)-tetrakis(1,1,1,5,5,5-hexafluoropentane-2,4-dionato)-di-copper(ii).	1:1	1	1	κ2	M2	2	2-c N2O2Cu2	acetylacetonato	terminal	co-ligand	A*M2	A*B01)2	A*B01)2*M2	0D	0D	2	2	2M4-1	1,2,4M8-3
QUXYEP	Wei Gao,Xiu-Mei Zhang,Jie-Ping Liu,En-Qing Gao INORG.CHIM.ACTA,2016,440,21	catena-((\m-4-(N-oxidopyridin-4-yl)benzoato)-(\m-hydroxo)-copper(ii)).	1:1	1	1	κ2	M2	2	1D CuON	carboxylate, hydroxo	increases connectivity	heterocyclic N-oxide and co-ligand	A*M2	A*B2*M2	A*T4*M2	1D	2D	none	none	2C1	4,6L26
QUXYIT	Wei Gao,Xiu-Mei Zhang,Jie-Ping Liu,En-Qing Gao INORG.CHIM.ACTA,2016,440,21	catena-((\m-4-(N-oxidopyridin-3-yl)benzoato)-(\m-hydroxo)-copper(ii)).	1:1	1	1	κ1	M1	1	none	carboxylate, hydroxo	increases connectivity	heterocyclic N-oxide and co-ligand	A*M1	A*B2*M2	A*T3*M2	0D	2D	1	none	1M2-1	gek1
RAMLUM	I.Yeltsov,V.Ovcharenko,V.Ikorskii,G.Romanenko,S.Vasilevsky POLYHEDRON,2001,20,1215	catena-(bis(\m~2~-(4-Pyridyl) nitronyl nitroxideradical)-tetrakis((2-thienoyl)trifluoroacetonato)-di-copper(ii) benzenesolvate).	1:1	2	1	κ1	M1	2	none	acetylacetonato, pyridyl	increases connectivity	heterocyclic N-oxide and co-ligand	A*M1	A*B01)2*M1	A*B2*B01)2	0D	1D	1	none	1,2M3-1	2C1
REJQEE	J.J.Henkelis,S.A.Barnett,L.P.Harding,M.J.Hardie INORG.CHEM.,2012,51,10657	catena-(bis(\m~5~-bis(2,7,12-trimethoxy-3,8,13-tris(2-N-oxide-pyridylmethoxy)-10,15-dihydro-5H-tribenzo[a,d,g]cyclononatriene))-decachloro-tetrakis(N-methylpyrolidone)-penta-copper(ii) N-methylpyrolidone clathrate).	5:2	3	3	κ2, κ1	T5	2	2-c N2O2Cu2	chloro	terminal	co-ligand	A)5*T5)2	A)5*M1)14	A)5*T5)2*M1)14	2D	2D	none	none	2,2,5-c net new4 (hcb)	hcb
REJQII	J.J.Henkelis,S.A.Barnett,L.P.Harding,M.J.Hardie INORG.CHEM.,2012,51,10657	dichloro-bis(dimethylformamide)-(2,7,12-trimethoxy-3,8,13-tris(4-N-oxide-pyridyloxy)-10,15-dihydro-5H-tribenzo[a,d,g]cyclononatriene)-copper(ii) dihydrate.	1:1	3	1	κ1	M1	1	none	chloro, dimethylformamide	terminal	co-ligand	A*M1	A*M1)4	A*M1)5	0D	0D	1	1	1M2-1	1,5M6-1
REJRAB	J.J.Henkelis,S.A.Barnett,L.P.Harding,M.J.Hardie INORG.CHEM.,2012,51,10657	catena-(bis((\m~2~-bis(2,7,12-trimethoxy-3,8,13-tris(3-N-oxide-pyridyloxy)-10, 15-dihydro-5H-tribenzo[a,d,g]cyclononatriene)-(dimethylformamide))-copper(ii)diperchlorate dimethylformamide clathrate)).	1:2	3	2	κ1	B2	4	none	dimethylformamide	terminal	co-ligand	A*B2)2	A*M1)2	A*B2)2*M1)2	2D	2D	none	none	2,4L2(sql)	sql
REXTUK	C.Rajadurai,K.Falk,S.Ostrovsky,V.Enkelmann,W.Haase,M.Baumgarten INORG.CHIM.ACTA,2005,358,3391	catena-((\m~2~-2-(4-(Trimethylsilylethynyl)phenyl)-4,4,5,5-tetramethyl-3-oxylimidazoline-1-oxide)-bis(hexafluoroacetylacetonato)-copper(ii)).	1:1	2	2	κ1	B2	2	none	acetylacetonato	terminal	co-ligand	A*B2	A*B01)2	A*B2*B01)2	1D	1D	none	none	2C1	2C1
ROCHIA	H.Oshio,T.Watanabe,A.Ohto,T.Ito INORG.CHEM.,1997,36,1608	catena-((\m~2~-2-(1'-Oxy-4',4',5',5'-tetramethyl-4',5'-dihydro-1'H-imidazol-2'-yl)-6-(1''-oxyl-4'',4'',5'',5''-tetramethyl-4'',5''-dihydro-1''H-imidazol-2''-yl)pyridine)-copper(ii) hexafluorophosphate).	1:1	2	2	κ1	B2	2	none	pyridin, imidazol	increases connectivity	heterocyclic N-oxide and co-ligand	A*B2	A)2*B2*B01)2	A)2*K101)2*B2	1D	3D	none	none	2C1	srs; 3/10/c1
RODKOL	G.V.Romanenko,S.E.Tolstikov,E.V.Tret'yakov,S.V.Fokin,V.N.Ikorskii,V.I.Ovcharenko IZV.AKAD.NAUK SSSR,SER.KHIM.(RUSS.)(RUSS.CHEM.BULL.),2007,1732	catena-((\m~4~-1,6-di(4-(4,4,5,5-tetramethyl-3-oxide-1-oxyl-4,5-dihydro-1H-imidazol-2-yl)-1H-pyrazol-1-yl)decane-N,N',O,O')-tetrakis(hexafluoroacetylacetonato-O,O')-di-copper(ii)).	2:1	4	2	κ1	B2	1	none	pyrazol, acetylacetonato	increases connectivity	heterocyclic N-oxide and co-ligand	A)2*B2	A)2*B2*B01)4	A)2*K4*B01)4	0D	2D	1	none	1,2M3-1	sql
RODKOL01	G.V.Romanenko,S.E.Tolstikov,E.V.Tret'yakov,S.V.Fokin,V.N.Ikorskii,V.I.Ovcharenko IZV.AKAD.NAUK SSSR,SER.KHIM.(RUSS.)(RUSS.CHEM.BULL.),2007,1732	catena-(bis(\m~4~-1,6-di(4-(4,4,5,5-tetramethyl-3-oxide-1-oxyl-4,5-dihydro-1H-imidazol-2-yl)-1H-pyrazol-1-yl)decane)-octakis(hexafluoroacetylacetonato)-tetra-copper(ii)).	2:1	4	2	κ1	B2	2, 1	none	pyrazol, acetylacetonato	increases connectivity	heterocyclic N-oxide and co-ligand	A)2*B2	A)2*B2*B01)4	A)2*K4*B01)4	0D	2D	3, 1	none	1,2,2M5-1	sql
RODKUR	G.V.Romanenko,S.E.Tolstikov,E.V.Tret'yakov,S.V.Fokin,V.N.Ikorskii,V.I.Ovcharenko IZV.AKAD.NAUK SSSR,SER.KHIM.(RUSS.)(RUSS.CHEM.BULL.),2007,1732	catena-((\m~4~-1,6-di(4-(4,4,5,5-tetramethyl-3-oxide-1-oxyl-4,5-dihydro-1H-imidazol-2-yl)-1H-pyrazol-1-yl)dodecane)-tetrakis(hexafluoroacetylacetonato)-di-copper(ii) bis(hexafluoroacetylacetonato)-bis(isopropanol)-copper(ii)).	3:1	4	2	κ1	B2	2	none	pyrazol, acetylacetonato	increases connectivity	heterocyclic N-oxide and co-ligand	A)3*B2	A)3*B2*B01)6*M1)2	A)3*K4*B01)6*M1)2	1D	2D	none	none	2C1	sql|1,4M5-1
RODLAY	G.V.Romanenko,S.E.Tolstikov,E.V.Tret'yakov,S.V.Fokin,V.N.Ikorskii,V.I.Ovcharenko IZV.AKAD.NAUK SSSR,SER.KHIM.(RUSS.)(RUSS.CHEM.BULL.),2007,1732	(\m~4~-1,6-di(4-(4,4,5,5-tetramethyl-3-oxide-1-oxyl-4,5-dihydro-1H-imidazol-2-yl)-1H-pyrazol-1-yl)octane)-tetrakis(hexafluoroacetylacetonato)-tetra-copper(ii).	4:1	4	2	κ1	B2	1	none	pyrazol, acetylacetonato	increases connectivity	heterocyclic N-oxide and co-ligand	A)4*B2	A)4*B2*B01)8	A)4*K4*B01)8	0D	0D	1	4	1,2M3-1	1,3,4M13-1
RODLEC	G.V.Romanenko,S.E.Tolstikov,E.V.Tret'yakov,S.V.Fokin,V.N.Ikorskii,V.I.Ovcharenko IZV.AKAD.NAUK SSSR,SER.KHIM.(RUSS.)(RUSS.CHEM.BULL.),2007,1732	(\m~4~-1,6-di(4-(4,4,5,5-tetramethyl-3-oxide-1-oxyl-4,5-dihydro-1H-imidazol-2-yl)-1H-pyrazol-1-yl)decane)-tetrakis(hexafluoroacetylacetonato)-tetra-copper(ii) hexane solvate.	4:1	4	2	κ1	B2	1	none	pyrazol, acetylacetonato	increases connectivity	heterocyclic N-oxide and co-ligand	A)4*B2	A)4*B2*B01)8	A)4*K4*B01)8	0D	0D	1	4	1,2M3-1	1,3,4M13-1
RORJIT	Ying Xiong,Yan-Zhong Fan,Rui Yang,Sha Chen,Mei Pan,Ji-Jun Jiang,Cheng-Yong Su CHEM.COMMUN.,2014,50,14631	catena-[(\m~5~-5-(((1-Oxidopyridin-4-yl)carbonyl)amino)benzene-1,3-dicarboxylato)-copper N,N-dimethylformamide solvate trihydrate]. LIFM-11(Cu).	1:1	1	1	κ1	M1	1	none	carboxylate	increases connectivity	heterocyclic N-oxide	A*M1	A*K4	A*P5	0D	3D	1	none	1M2-1	5,5T17
SEKKAV	P.Brough,J.Pecaut,A.Rassat,P.Rey Chem.-Eur.J.,2006,12,5134	bis(\m~2~-2-(p-Nitrophenyl)-4,4,6,6-tetramethyl-1,4,5,6-tetrahydropyrimidine-3-oxide-1-oxyl-O,O')-hexakis(hexafluoroacetylacetonato-O,O')-tri-copper(ii).	3:2	2	2	κ1	B2	2, 1	none	acetylacetonato	terminal	co-ligand	A)3*B2)2	A*B01)2	A)3*B2)2*B01)6	0D	0D	3	3	1,2,2M5-1	1,1,2,3,4M11-1
SIYWUS	A.B.Burdukov,V.I.Ovcharenko,V.N.Ikorski,N.V.Pervukhina,N.V.Podberezskaya,I.A.Grigor'ev,S.V.Larionov,L.B.Volodarsky INORG.CHEM.,1991,30,972	catena-(bis(bis(\m~2~-4-Ethyl-2,2,5,5-tetramethyl-3-imidazoline1-oxide-N^3^,O)-tris(hexafluoroacetylacetonato)-di-copper(i,ii))).	1:1	1	1	κ1	M1	2	none	1-oxyl-3-imidazoline, acetylacetonato	increases connectivity	heterocyclic N-oxide and co-ligand	A*M1	A)2*B01)3*M1)2	A)2*B2)2*B01)3	0D	1D	1	none	1,2M3-1	2C1
SIZFAJ	Y.P.Nizhnik,A.Szemik-Hojniak,I.Deperasinska,L.B.Jerzykiewicz,M.Korabik,M.Hojniak,V.P.Andreev INORG.CHEM.,2008,47,2103	bis(\m~2~-4-(4-Methoxystyryl)pyridineN-oxide-O,O)-aqua-tetrachloro-ethanol-di-copper(ii).	1:1	1	1	κ2	M2	2	2-c N2O2Cu2	water, chloro, ethanol	terminal	co-ligand	A*M2	A*M1)3	A*M2*M1)3	0D	0D	2	2	2M4-1	1,2,5M10-1
SOHRUD	V.I.Ovcharenko,G.V.Romanenko,K.Yu.Maryunina,A.S.Bogomyakov,E.V.Gorelik INORG.CHEM.,2008,47,9537	catena-(bis(\m~2~-4,4,5,5-Tetramethyl-2-(1-butylpyrazole-4-yl)-4,5-dihydro-1H-imidazol-3-oxide-1-oxyl)-tetrakis(1,1,1,5,5,5-hexafluoropentan-2,4-dionato)-di-copper(ii) bromobutane solvate).	1:1	2	1	κ1	M1	2	none	pyrazol, acetylacetonato	increases connectivity	heterocyclic N-oxide and co-ligand	A*M1	A*B01)2*M1	A*B2*B01)2	0D	1D	1	none	1,2M3-1	2C1
SOHRUD01	V.I.Ovcharenko,G.V.Romanenko,K.Yu.Maryunina,A.S.Bogomyakov,E.V.Gorelik INORG.CHEM.,2008,47,9537	catena-(bis(\m~2~-4,4,5,5-Tetramethyl-2-(1-butylpyrazole-4-yl)-4,5-dihydro-1H-imidazol-3-oxide-1-oxyl)-tetrakis(1,1,1,5,5,5-hexafluoropentan-2,4-dionato)-di-copper(ii) bromobutane solvate).	1:1	2	1	κ1	M1	2	none	pyrazol, acetylacetonato	increases connectivity	heterocyclic N-oxide and co-ligand	A*M1	A*B01)2*M1	A*B2*B01)2	0D	1D	1	none	1,2M3-1	2C1
SOHRUD02	V.I.Ovcharenko,G.V.Romanenko,K.Yu.Maryunina,A.S.Bogomyakov,E.V.Gorelik INORG.CHEM.,2008,47,9537	catena-(bis(\m~2~-4,4,5,5-Tetramethyl-2-(1-butylpyrazole-4-yl)-4,5-dihydro-1H-imidazol-3-oxide-1-oxyl)-tetrakis(1,1,1,5,5,5-hexafluoropentan-2,4-dionato)-di-copper(ii) bromobutane solvate).	1:1	2	1	κ1	M1	2	none	pyrazol, acetylacetonato	increases connectivity	heterocyclic N-oxide and co-ligand	A*M1	A*B01)2*M1	A*B2*B01)2	0D	1D	1	none	1,2M3-1	2C1
SOHSAK	V.I.Ovcharenko,G.V.Romanenko,K.Yu.Maryunina,A.S.Bogomyakov,E.V.Gorelik INORG.CHEM.,2008,47,9537	catena-(bis(\m~2~-4,4,5,5-Tetramethyl-2-(1-butylpyrazole-4-yl)-4,5-dihydro-1H-imidazol-3-oxide-1-oxyl)-tetrakis(1,1,1,5,5,5-hexafluoropentan-2,4-dionato)-di-copper(ii) chlorobutane solvate).	1:1	2	1	κ1	M1	2	none	pyrazol, acetylacetonato	increases connectivity	heterocyclic N-oxide and co-ligand	A*M1	A*B01)2*M1	A*B2*B01)2	0D	1D	1	none	1,2M3-1	2C1
SOHSAK01	Ovcharenko V.I.,Romanenko G.V.,Maryunina K.YU.,Bogomyakov A.S.,Gorelik E.V. INORG.CHEM.,2008,47,9537	catena-(bis(m~2~-4,4,5,5-Tetramethyl-2-(1-butylpyrazole-4-yl)-4,5-dihydro-1H-imidazol-3-oxide-1-oxyl)-tetrakis(1,1,1,5,5,5-hexafluoropentan-2,4-dionato)-di-copper(ii) chlorobutane solvate).	1:1	2	1	κ1	M1	2	none	pyrazol, acetylacetonato	increases connectivity	heterocyclic N-oxide and co-ligand	A*M1	A*B01)2*M1	A*B2*B01)2	0D	1D	1	none	1,2M3-1	2C1
SOHSAK02	V.I.Ovcharenko,G.V.Romanenko,K.Yu.Maryunina,A.S.Bogomyakov,E.V.Gorelik INORG.CHEM.,2008,47,9537	catena-(bis(\m~2~-4,4,5,5-Tetramethyl-2-(1-butylpyrazole-4-yl)-4,5-dihydro-1H-imidazol-3-oxide-1-oxyl)-tetrakis(1,1,1,5,5,5-hexafluoropentan-2,4-dionato)-di-copper(ii) chlorobutane solvate).	1:1	2	1	κ1	M1	2	none	pyrazol, acetylacetonato	increases connectivity	heterocyclic N-oxide and co-ligand	A*M1	A*B01)2*M1	A*B2*B01)2	0D	1D	1	none	1,2M3-1	2C1
SOHSAK03	Ovcharenko V.I.,Romanenko G.V.,Maryunina K.YU.,Bogomyakov A.S.,Gorelik E.V. INORG.CHEM.,2008,47,9537	catena-(bis(\m~2~-4,4,5,5-Tetramethyl-2-(1-butylpyrazole-4-yl)-4,5-dihydro-1H-imidazol-3-oxide-1-oxyl)-tetrakis(1,1,1,5,5,5-hexafluoropentan-2,4-dionato)-di-copper(ii) chlorobutane solvate).	1:1	2	1	κ1	M1	2	none	pyrazol, acetylacetonato	increases connectivity	heterocyclic N-oxide and co-ligand	A*M1	A*B01)2*M1	A*B2*B01)2	0D	1D	1	none	1,2M3-1	2C1
SOHSAK04	V.I.Ovcharenko,G.V.Romanenko,K.Yu.Maryunina,A.S.Bogomyakov,E.V.Gorelik INORG.CHEM.,2008,47,9537	catena-(bis(\m~2~-4,4,5,5-Tetramethyl-2-(1-butylpyrazole-4-yl)-4,5-dihydro-1H-imidazol-3-oxide-1-oxyl)-tetrakis(1,1,1,5,5,5-hexafluoropentan-2,4-dionato)-di-copper(ii) chlorobutane solvate).	1:1	2	1	κ1	M1	2	none	pyrazol, acetylacetonato	increases connectivity	heterocyclic N-oxide and co-ligand	A*M1	A*B01)2*M1	A*B2*B01)2	0D	1D	1	none	1,2M3-1	2C1
SOHSEO	V.I.Ovcharenko,G.V.Romanenko,K.Yu.Maryunina,A.S.Bogomyakov,E.V.Gorelik INORG.CHEM.,2008,47,9537	catena-(bis(\m~2~-4,4,5,5-Tetramethyl-2-(1-butylpyrazole-4-yl)-4,5-dihydro-1H-imidazol-3-oxide-1-oxyl)-tetrakis(1,1,1,5,5,5-hexafluoropentan-2,4-dionato)-di-copper(ii) iodobutane solvate).	1:1	2	1	κ1	M1	2	none	pyrazol, acetylacetonato	increases connectivity	heterocyclic N-oxide and co-ligand	A*M1	A*B01)2*M1	A*B2*B01)2	0D	1D	1	none	1,2M3-1	2C1
SOHSEO01	V.I.Ovcharenko,G.V.Romanenko,K.Yu.Maryunina,A.S.Bogomyakov,E.V.Gorelik INORG.CHEM.,2008,47,9537	catena-(bis(\m~2~-4,4,5,5-Tetramethyl-2-(1-butylpyrazole-4-yl)-4,5-dihydro-1H-imidazol-3-oxide-1-oxyl)-tetrakis(1,1,1,5,5,5-hexafluoropentan-2,4-dionato)-di-copper(ii) iodobutane solvate).	1:1	2	1	κ1	M1	2	none	pyrazol, acetylacetonato	increases connectivity	heterocyclic N-oxide and co-ligand	A*M1	A*B01)2*M1	A*B2*B01)2	0D	1D	1	none	1,2M3-1	2C1
SOHSEO02	V.I.Ovcharenko,G.V.Romanenko,K.Yu.Maryunina,A.S.Bogomyakov,E.V.Gorelik INORG.CHEM.,2008,47,9537	catena-(bis(\m~2~-4,4,5,5-Tetramethyl-2-(1-butylpyrazole-4-yl)-4,5-dihydro-1H-imidazol-3-oxide-1-oxyl)-tetrakis(1,1,1,5,5,5-hexafluoropentan-2,4-dionato)-di-copper(ii) iodobutane solvate).	1:1	2	1	κ1	M1	2	none	pyrazol, acetylacetonato	increases connectivity	heterocyclic N-oxide and co-ligand	A*M1	A*B01)2*M1	A*B2*B01)2	0D	1D	1	none	1,2M3-1	2C1
SOHSEO03	V.I.Ovcharenko,G.V.Romanenko,K.Yu.Maryunina,A.S.Bogomyakov,E.V.Gorelik INORG.CHEM.,2008,47,9537	catena-(bis(\m~2~-4,4,5,5-Tetramethyl-2-(1-butylpyrazole-4-yl)-4,5-dihydro-1H-imidazol-3-oxide-1-oxyl)-tetrakis(1,1,1,5,5,5-hexafluoropentan-2,4-dionato)-di-copper(ii) iodobutane solvate).	1:1	2	1	κ1	M1	2	none	pyrazol, acetylacetonato	increases connectivity	heterocyclic N-oxide and co-ligand	A*M1	A*B01)2*M1	A*B2*B01)2	0D	1D	1	none	1,2M3-1	2C1
SOHSIS	V.I.Ovcharenko,G.V.Romanenko,K.Yu.Maryunina,A.S.Bogomyakov,E.V.Gorelik INORG.CHEM.,2008,47,9537	catena-(bis(\m~2~-4,4,5,5-Tetramethyl-2-(1-butylpyrazole-4-yl)-4,5-dihydro-1H-imidazol-3-oxide-1-oxyl)-tetrakis(1,1,1,5,5,5-hexafluoropentan-2,4-dionato)-di-copper(ii)).	1:1	2	1	κ1	M1	2	none	pyrazol, acetylacetonato	increases connectivity	heterocyclic N-oxide and co-ligand	A*M1	A*B01)2*M1	A*B2*B01)2	0D	1D	1	none	1,2M3-1	2C1
SOHSIS01	V.I.Ovcharenko,G.V.Romanenko,K.Yu.Maryunina,A.S.Bogomyakov,E.V.Gorelik INORG.CHEM.,2008,47,9537	catena-(bis(\m~2~-4,4,5,5-Tetramethyl-2-(1-butylpyrazole-4-yl)-4,5-dihydro-1H-imidazol-3-oxide-1-oxyl)-tetrakis(1,1,1,5,5,5-hexafluoropentan-2,4-dionato)-di-copper(ii)).	1:1	2	1	κ1	M1	2	none	pyrazol, acetylacetonato	increases connectivity	heterocyclic N-oxide and co-ligand	A*M1	A*B01)2*M1	A*B2*B01)2	0D	1D	1	none	1,2M3-1	2C1
SOHSIS02	V.I.Ovcharenko,G.V.Romanenko,K.Yu.Maryunina,A.S.Bogomyakov,E.V.Gorelik INORG.CHEM.,2008,47,9537	catena-(bis(\m~2~-4,4,5,5-Tetramethyl-2-(1-butylpyrazole-4-yl)-4,5-dihydro-1H-imidazol-3-oxide-1-oxyl)-tetrakis(1,1,1,5,5,5-hexafluoropentan-2,4-dionato)-di-copper(ii)).	1:1	2	1	κ1	M1	2	none	pyrazol, acetylacetonato	increases connectivity	heterocyclic N-oxide and co-ligand	A*M1	A*B01)2*M1	A*B2*B01)2	0D	1D	1	none	1,2M3-1	2C1
SOHSIS03	V.I.Ovcharenko,G.V.Romanenko,K.Yu.Maryunina,A.S.Bogomyakov,E.V.Gorelik INORG.CHEM.,2008,47,9537	catena-(bis(\m~2~-4,4,5,5-Tetramethyl-2-(1-butylpyrazole-4-yl)-4,5-dihydro-1H-imidazol-3-oxide-1-oxyl)-tetrakis(1,1,1,5,5,5-hexafluoropentan-2,4-dionato)-di-copper(ii)).	1:1	2	1	κ1	M1	2	none	pyrazol, acetylacetonato	increases connectivity	heterocyclic N-oxide and co-ligand	A*M1	A*B01)2*M1	A*B2*B01)2	0D	1D	1	none	1,2M3-1	2C1
SOHSOY	V.I.Ovcharenko,G.V.Romanenko,K.Yu.Maryunina,A.S.Bogomyakov,E.V.Gorelik INORG.CHEM.,2008,47,9537	catena-(bis(\m~2~-4,4,5,5-Tetramethyl-2-(1-butylpyrazole-4-yl)-4,5-dihydro-1H-imidazol-3-oxide-1-oxyl)-tetrakis(1,1,1,5,5,5-hexafluoropentan-2,4-dionato)-di-copper(ii) diethyl ether solvate).	1:1	2	1	κ1	M1	2	none	pyrazol, acetylacetonato	increases connectivity	heterocyclic N-oxide and co-ligand	A*M1	A*B01)2*M1	A*B2*B01)2	0D	1D	1	none	1,2M3-1	2C1
SOHSOY01	V.I.Ovcharenko,G.V.Romanenko,K.Yu.Maryunina,A.S.Bogomyakov,E.V.Gorelik INORG.CHEM.,2008,47,9537	catena-(bis(\m~2~-4,4,5,5-Tetramethyl-2-(1-butylpyrazole-4-yl)-4,5-dihydro-1H-imidazol-3-oxide-1-oxyl)-tetrakis(1,1,1,5,5,5-hexafluoropentan-2,4-dionato)-di-copper(ii) diethyl ether solvate).	1:1	2	1	κ1	M1	2	none	pyrazol	increases connectivity	heterocyclic N-oxide and co-ligand	A*M1	A*B01)2*M1	A*B2*B01)2	0D	1D	1	none	1,2M3-1	2C1
SOHSOY02	V.I.Ovcharenko,G.V.Romanenko,K.Yu.Maryunina,A.S.Bogomyakov,E.V.Gorelik INORG.CHEM.,2008,47,9537	catena-(bis(\m~2~-4,4,5,5-Tetramethyl-2-(1-butylpyrazole-4-yl)-4,5-dihydro-1H-imidazol-3-oxide-1-oxyl)-tetrakis(1,1,1,5,5,5-hexafluoropentan-2,4-dionato)-di-copper(ii) diethyl ether solvate).	1:1	2	1	κ1	M1	2	none	pyrazol	increases connectivity	heterocyclic N-oxide and co-ligand	A*M1	A*B01)2*M1	A*B2*B01)2	0D	1D	1	none	1,2M3-1	2C1
SOHSOY03	V.I.Ovcharenko,G.V.Romanenko,K.Yu.Maryunina,A.S.Bogomyakov,E.V.Gorelik INORG.CHEM.,2008,47,9537	catena-(bis(\m~2~-4,4,5,5-Tetramethyl-2-(1-butylpyrazole-4-yl)-4,5-dihydro-1H-imidazol-3-oxide-1-oxyl)-tetrakis(1,1,1,5,5,5-hexafluoropentan-2,4-dionato)-di-copper(ii) diethyl ether solvate).	1:1	2	1	κ1	M1	2	none	pyrazol	increases connectivity	heterocyclic N-oxide and co-ligand	A*M1	A*B01)2*M1	A*B2*B01)2	0D	1D	1	none	1,2M3-1	2C1
SOHSUE	V.I.Ovcharenko,G.V.Romanenko,K.Yu.Maryunina,A.S.Bogomyakov,E.V.Gorelik INORG.CHEM.,2008,47,9537	catena-(tetrakis(\m~2~-4,4,5,5-Tetramethyl-2-(1-butylpyrazole-4-yl)-4,5-dihydro-1H-imidazol-3-oxide-1-oxyl)-octakis(1,1,1,5,5,5-hexafluoropentan-2,4-dionato)-tetra-copper(ii) hexane solvate).	1:1	2	1	κ1	M1	2	none	pyrazol, acetylacetonato	increases connectivity	heterocyclic N-oxide and co-ligand	A*M1	A*B01)2*M1	A*B2*B01)2	0D	1D	1	none	1,2M3-1	2C1
SOHSUE01	V.I.Ovcharenko,G.V.Romanenko,K.Yu.Maryunina,A.S.Bogomyakov,E.V.Gorelik INORG.CHEM.,2008,47,9537	catena-(tetrakis(\m~2~-4,4,5,5-Tetramethyl-2-(1-butylpyrazole-4-yl)-4,5-dihydro-1H-imidazol-3-oxide-1-oxyl)-octakis(1,1,1,5,5,5-hexafluoropentan-2,4-dionato)-tetra-copper(ii) hexane solvate).	1:1	2	1	κ1	M1	2	none	pyrazol, acetylacetonato	increases connectivity	heterocyclic N-oxide and co-ligand	A*M1	A*B01)2*M1	A*B2*B01)2	0D	1D	1	none	1,2M3-1	2C1
SOHSUE02	V.I.Ovcharenko,G.V.Romanenko,K.Yu.Maryunina,A.S.Bogomyakov,E.V.Gorelik INORG.CHEM.,2008,47,9537	catena-(tetrakis(\m~2~-4,4,5,5-Tetramethyl-2-(1-butylpyrazole-4-yl)-4,5-dihydro-1H-imidazol-3-oxide-1-oxyl)-octakis(1,1,1,5,5,5-hexafluoropentan-2,4-dionato)-tetra-copper(ii) hexane solvate).	1:1	2	1	κ1	M1	2	none	pyrazol, acetylacetonato	increases connectivity	heterocyclic N-oxide and co-ligand	A*M1	A*B01)2*M1	A*B2*B01)2	0D	1D	1	none	1,2M3-1	2C1
SOHSUE03	V.I.Ovcharenko,G.V.Romanenko,K.Yu.Maryunina,A.S.Bogomyakov,E.V.Gorelik INORG.CHEM.,2008,47,9537	catena-(tetrakis(\m~2~-4,4,5,5-Tetramethyl-2-(1-butylpyrazole-4-yl)-4,5-dihydro-1H-imidazol-3-oxide-1-oxyl)-octakis(1,1,1,5,5,5-hexafluoropentan-2,4-dionato)-tetra-copper(ii) hexane solvate).	1:1	2	1	κ1	M1	2	none	pyrazol, acetylacetonato	increases connectivity	heterocyclic N-oxide and co-ligand	A*M1	A*B01)2*M1	A*B2*B01)2	0D	1D	1	none	1,2M3-1	2C1
SOHSUE04	V.I.Ovcharenko,G.V.Romanenko,K.Yu.Maryunina,A.S.Bogomyakov,E.V.Gorelik INORG.CHEM.,2008,47,9537	catena-(tetrakis(\m~2~-4,4,5,5-Tetramethyl-2-(1-butylpyrazole-4-yl)-4,5-dihydro-1H-imidazol-3-oxide-1-oxyl)-octakis(1,1,1,5,5,5-hexafluoropentan-2,4-dionato)-di-copper(ii) hexane solvate).	1:1	2	1	κ1	M1	2	none	pyrazol, acetylacetonato	increases connectivity	heterocyclic N-oxide and co-ligand	A*M1	A*B01)2*M1	A*B2*B01)2	0D	1D	1	none	1,2M3-1	2C1
SOHSUE05	V.I.Ovcharenko,G.V.Romanenko,K.Yu.Maryunina,A.S.Bogomyakov,E.V.Gorelik INORG.CHEM.,2008,47,9537	catena-(tetrakis(\m~2~-4,4,5,5-Tetramethyl-2-(1-butylpyrazole-4-yl)-4,5-dihydro-1H-imidazol-3-oxide-1-oxyl)-octakis(1,1,1,5,5,5-hexafluoropentan-2,4-dionato)-tetra-copper(ii) hexane solvate).	1:1	2	1	κ1	M1	2	none	pyrazol, acetylacetonato	increases connectivity	heterocyclic N-oxide and co-ligand	A*M1	A*B01)2*M1	A*B2*B01)2	0D	1D	1	none	1,2M3-1	2C1
SOHSUE06	V.I.Ovcharenko,G.V.Romanenko,K.Yu.Maryunina,A.S.Bogomyakov,E.V.Gorelik INORG.CHEM.,2008,47,9537	catena-(bis(\m~2~-4,4,5,5-Tetramethyl-2-(1-butylpyrazole-4-yl)-4,5-dihydro-1H-imidazol-3-oxide-1-oxyl)-tetrakis(1,1,1,5,5,5-hexafluoropentan-2,4-dionato)-di-copper(ii) hexane solvate).	1:1	2	1	κ1	M1	2	none	pyrazol, acetylacetonato	increases connectivity	heterocyclic N-oxide and co-ligand	A*M1	A*B01)2*M1	A*B2*B01)2	0D	1D	1	none	1,2M3-1	2C1
SOHSUE07	V.I.Ovcharenko,G.V.Romanenko,K.Yu.Maryunina,A.S.Bogomyakov,E.V.Gorelik INORG.CHEM.,2008,47,9537	catena-(bis(\m~2~-4,4,5,5-Tetramethyl-2-(1-butylpyrazole-4-yl)-4,5-dihydro-1H-imidazol-3-oxide-1-oxyl)-tetrakis(1,1,1,5,5,5-hexafluoropentan-2,4-dionato)-di-copper(ii) hexane solvate).	1:1	2	1	κ1	M1	2	none	pyrazol, acetylacetonato	increases connectivity	heterocyclic N-oxide and co-ligand	A*M1	A*B01)2*M1	A*B2*B01)2	0D	1D	1	none	1,2M3-1	2C1
SOHSUE08	V.I.Ovcharenko,G.V.Romanenko,K.Yu.Maryunina,A.S.Bogomyakov,E.V.Gorelik INORG.CHEM.,2008,47,9537	catena-(bis(\m~2~-4,4,5,5-Tetramethyl-2-(1-butylpyrazole-4-yl)-4,5-dihydro-1H-imidazol-3-oxide-1-oxyl)-tetrakis(1,1,1,5,5,5-hexafluoropentan-2,4-dionato)-di-copper(ii) hexane solvate).	1:1	2	1	κ1	M1	2	none	pyrazol, acetylacetonato	increases connectivity	heterocyclic N-oxide and co-ligand	A*M1	A*B01)2*M1	A*B2*B01)2	0D	1D	1	none	1,2M3-1	2C1
SOHSUE09	V.I.Ovcharenko,G.V.Romanenko,K.Yu.Maryunina,A.S.Bogomyakov,E.V.Gorelik INORG.CHEM.,2008,47,9537	catena-(bis(\m~2~-4,4,5,5-Tetramethyl-2-(1-butylpyrazole-4-yl)-4,5-dihydro-1H-imidazol-3-oxide-1-oxyl)-tetrakis(1,1,1,5,5,5-hexafluoropentan-2,4-dionato)-di-copper(ii) hexane solvate).	1:1	2	1	κ1	M1	2	none	pyrazol, acetylacetonato	increases connectivity	heterocyclic N-oxide and co-ligand	A*M1	A*B01)2*M1	A*B2*B01)2	0D	1D	1	none	1,2M3-1	2C1
SOHSUE10	V.I.Ovcharenko,G.V.Romanenko,K.Yu.Maryunina,A.S.Bogomyakov,E.V.Gorelik INORG.CHEM.,2008,47,9537	catena-(bis(\m~2~-4,4,5,5-Tetramethyl-2-(1-butylpyrazole-4-yl)-4,5-dihydro-1H-imidazol-3-oxide-1-oxyl)-tetrakis(1,1,1,5,5,5-hexafluoropentan-2,4-dionato)-di-copper(ii) hexane solvate).	1:1	2	1	κ1	M1	2	none	pyrazol, acetylacetonato	increases connectivity	heterocyclic N-oxide and co-ligand	A*M1	A*B01)2*M1	A*B2*B01)2	0D	1D	1	none	1,2M3-1	2C1
SOHTAL	V.I.Ovcharenko,G.V.Romanenko,K.Yu.Maryunina,A.S.Bogomyakov,E.V.Gorelik INORG.CHEM.,2008,47,9537	catena-(bis(\m~2~-4,4,5,5-Tetramethyl-2-(1-butylpyrazole-4-yl)-4,5-dihydro-1H-imidazol-3-oxide-1-oxyl)-tetrakis(1,1,1,5,5,5-hexafluoropentan-2,4-dionato)-di-copper(ii) octene solvate).	1:1	2	1	κ1	M1	2	none	pyrazol, acetylacetonato	increases connectivity	heterocyclic N-oxide and co-ligand	A*M1	A*B01)2*M1	A*B2*B01)2	0D	1D	1	none	1,2M3-1	2C1
SOHTAL01	V.I.Ovcharenko,G.V.Romanenko,K.Yu.Maryunina,A.S.Bogomyakov,E.V.Gorelik INORG.CHEM.,2008,47,9537	catena-(bis(\m~2~-4,4,5,5-Tetramethyl-2-(1-butylpyrazole-4-yl)-4,5-dihydro-1H-imidazol-3-oxide-1-oxyl)-tetrakis(1,1,1,5,5,5-hexafluoropentan-2,4-dionato)-di-copper(ii) octene solvate).	1:1	2	1	κ1	M1	2	none	pyrazol, acetylacetonato	increases connectivity	heterocyclic N-oxide and co-ligand	A*M1	A*B01)2*M1	A*B2*B01)2	0D	1D	1	none	1,2M3-1	2C1
SOHTAL02	V.I.Ovcharenko,G.V.Romanenko,K.Yu.Maryunina,A.S.Bogomyakov,E.V.Gorelik INORG.CHEM.,2008,47,9537	catena-(bis(\m~2~-4,4,5,5-Tetramethyl-2-(1-butylpyrazole-4-yl)-4,5-dihydro-1H-imidazol-3-oxide-1-oxyl)-tetrakis(1,1,1,5,5,5-hexafluoropentan-2,4-dionato)-di-copper(ii) octene solvate).	1:1	2	1	κ1	M1	2	none	pyrazol, acetylacetonato	increases connectivity	heterocyclic N-oxide and co-ligand	A*M1	A*B01)2*M1	A*B2*B01)2	0D	1D	1	none	1,2M3-1	2C1
SOHTAL03	V.I.Ovcharenko,G.V.Romanenko,K.Yu.Maryunina,A.S.Bogomyakov,E.V.Gorelik INORG.CHEM.,2008,47,9537	catena-(bis(\m~2~-4,4,5,5-Tetramethyl-2-(1-butylpyrazole-4-yl)-4,5-dihydro-1H-imidazol-3-oxide-1-oxyl)-tetrakis(1,1,1,5,5,5-hexafluoropentan-2,4-dionato)-di-copper(ii) octene solvate).	1:1	2	1	κ1	M1	2	none	pyrazol, acetylacetonato	increases connectivity	heterocyclic N-oxide and co-ligand	A*M1	A*B01)2*M1	A*B2*B01)2	0D	1D	1	none	1,2M3-1	2C1
SOHTAL04	V.I.Ovcharenko,G.V.Romanenko,K.Yu.Maryunina,A.S.Bogomyakov,E.V.Gorelik INORG.CHEM.,2008,47,9537	catena-(bis(\m~2~-4,4,5,5-Tetramethyl-2-(1-butylpyrazole-4-yl)-4,5-dihydro-1H-imidazol-3-oxide-1-oxyl)-tetrakis(1,1,1,5,5,5-hexafluoropentan-2,4-dionato)-di-copper(ii) octene solvate).	1:1	2	1	κ1	M1	2	none	pyrazol, acetylacetonato	increases connectivity	heterocyclic N-oxide and co-ligand	A*M1	A*B01)2*M1	A*B2*B01)2	0D	1D	1	none	1,2M3-1	2C1
SOHTEP	V.I.Ovcharenko,G.V.Romanenko,K.Yu.Maryunina,A.S.Bogomyakov,E.V.Gorelik INORG.CHEM.,2008,47,9537	catena-(bis(\m~2~-4,4,5,5-Tetramethyl-2-(1-butylpyrazole-4-yl)-4,5-dihydro-1H-imidazol-3-oxide-1-oxyl)-tetrakis(1,1,1,5,5,5-hexafluoropentan-2,4-dionato)-di-copper(ii) pentane solvate).	1:1	2	1	κ1	M1	2	none	pyrazol, acetylacetonato	increases connectivity	heterocyclic N-oxide and co-ligand	A*M1	A*B01)2*M1	A*B2*B01)2	0D	1D	1	none	1,2M3-1	2C1
SOHTEP01	V.I.Ovcharenko,G.V.Romanenko,K.Yu.Maryunina,A.S.Bogomyakov,E.V.Gorelik INORG.CHEM.,2008,47,9537	catena-(bis(\m~2~-4,4,5,5-Tetramethyl-2-(1-butylpyrazole-4-yl)-4,5-dihydro-1H-imidazol-3-oxide-1-oxyl)-tetrakis(1,1,1,5,5,5-hexafluoropentan-2,4-dionato)-di-copper(ii) pentane solvate).	1:1	2	1	κ1	M1	2	none	pyrazol, acetylacetonato	increases connectivity	heterocyclic N-oxide and co-ligand	A*M1	A*B01)2*M1	A*B2*B01)2	0D	1D	1	none	1,2M3-1	2C1
SOHTEP02	V.I.Ovcharenko,G.V.Romanenko,K.Yu.Maryunina,A.S.Bogomyakov,E.V.Gorelik INORG.CHEM.,2008,47,9537	catena-(bis(\m~2~-4,4,5,5-Tetramethyl-2-(1-butylpyrazole-4-yl)-4,5-dihydro-1H-imidazol-3-oxide-1-oxyl)-tetrakis(1,1,1,5,5,5-hexafluoropentan-2,4-dionato)-di-copper(ii) pentane solvate).	1:1	2	1	κ1	M1	2	none	pyrazol, acetylacetonato	increases connectivity	heterocyclic N-oxide and co-ligand	A*M1	A*B01)2*M1	A*B2*B01)2	0D	1D	1	none	1,2M3-1	2C1
SOHTEP03	V.I.Ovcharenko,G.V.Romanenko,K.Yu.Maryunina,A.S.Bogomyakov,E.V.Gorelik INORG.CHEM.,2008,47,9537	catena-(bis(\m~2~-4,4,5,5-Tetramethyl-2-(1-butylpyrazole-4-yl)-4,5-dihydro-1H-imidazol-3-oxide-1-oxyl)-tetrakis(1,1,1,5,5,5-hexafluoropentan-2,4-dionato)-di-copper(ii) pentane solvate).	1:1	2	1	κ1	M1	2	none	pyrazol, acetylacetonato	increases connectivity	heterocyclic N-oxide and co-ligand	A*M1	A*B01)2*M1	A*B2*B01)2	0D	1D	1	none	1,2M3-1	2C1
SOHTEP04	V.I.Ovcharenko,G.V.Romanenko,K.Yu.Maryunina,A.S.Bogomyakov,E.V.Gorelik INORG.CHEM.,2008,47,9537	catena-(bis(\m~2~-4,4,5,5-Tetramethyl-2-(1-butylpyrazole-4-yl)-4,5-dihydro-1H-imidazol-3-oxide-1-oxyl)-tetrakis(1,1,1,5,5,5-hexafluoropentan-2,4-dionato)-di-copper(ii) pentane solvate).	1:1	2	1	κ1	M1	2	none	pyrazol	increases connectivity	heterocyclic N-oxide and co-ligand	A*M1	A*B01)2*M1	A*B2*B01)2	0D	1D	1	none	1,2M3-1	2C1
SOHTIT	V.I.Ovcharenko,G.V.Romanenko,K.Yu.Maryunina,A.S.Bogomyakov,E.V.Gorelik INORG.CHEM.,2008,47,9537	catena-(tetrakis(\m~2~-4,4,5,5-Tetramethyl-2-(1-butylpyrazole-4-yl)-4,5-dihydro-1H-imidazol-3-oxide-1-oxyl)-octakis(1,1,1,5,5,5-hexafluoropentan-2,4-dionato)-tetra-copper(ii) bromopentane solvate).	1:1	2	1	κ1	M1	2	none	pyrazol, acetylacetonato	increases connectivity	heterocyclic N-oxide and co-ligand	A*M1	A*B01)2*M1	A*B2*B01)2	0D	1D	1	none	1,2M3-1	2C1
SOHTIT01	V.I.Ovcharenko,G.V.Romanenko,K.Yu.Maryunina,A.S.Bogomyakov,E.V.Gorelik INORG.CHEM.,2008,47,9537	catena-(bis(\m~2~-4,4,5,5-Tetramethyl-2-(1-butylpyrazole-4-yl)-4,5-dihydro-1H-imidazol-3-oxide-1-oxyl)-tetrakis(1,1,1,5,5,5-hexafluoropentan-2,4-dionato)-di-copper(ii) bromopentane solvate).	1:1	2	1	κ1	M1	2	none	pyrazol, acetylacetonato	increases connectivity	heterocyclic N-oxide and co-ligand	A*M1	A*B01)2*M1	A*B2*B01)2	0D	1D	1	none	1,2M3-1	2C1
SOHTIT02	V.I.Ovcharenko,G.V.Romanenko,K.Yu.Maryunina,A.S.Bogomyakov,E.V.Gorelik INORG.CHEM.,2008,47,9537	catena-(bis(\m~2~-4,4,5,5-Tetramethyl-2-(1-butylpyrazole-4-yl)-4,5-dihydro-1H-imidazol-3-oxide-1-oxyl)-tetrakis(1,1,1,5,5,5-hexafluoropentan-2,4-dionato)-di-copper(ii) bromopentane solvate).	1:1	2	1	κ1	M1	2	none	pyrazol, acetylacetonato	increases connectivity	heterocyclic N-oxide and co-ligand	A*M1	A*B01)2*M1	A*B2*B01)2	0D	1D	1	none	1,2M3-1	2C1
SOHTIT03	V.I.Ovcharenko,G.V.Romanenko,K.Yu.Maryunina,A.S.Bogomyakov,E.V.Gorelik INORG.CHEM.,2008,47,9537	catena-(bis(\m~2~-4,4,5,5-Tetramethyl-2-(1-butylpyrazole-4-yl)-4,5-dihydro-1H-imidazol-3-oxide-1-oxyl)-tetrakis(1,1,1,5,5,5-hexafluoropentan-2,4-dionato)-di-copper(ii) bromopentane solvate).	1:1	2	1	κ1	M1	2	none	pyrazol, acetylacetonato	increases connectivity	heterocyclic N-oxide and co-ligand	A*M1	A*B01)2*M1	A*B2*B01)2	0D	1D	1	none	1,2M3-1	2C1
SOHTIT04	V.I.Ovcharenko,G.V.Romanenko,K.Yu.Maryunina,A.S.Bogomyakov,E.V.Gorelik INORG.CHEM.,2008,47,9537	catena-(bis(\m~2~-4,4,5,5-Tetramethyl-2-(1-butylpyrazole-4-yl)-4,5-dihydro-1H-imidazol-3-oxide-1-oxyl)-tetrakis(1,1,1,5,5,5-hexafluoropentan-2,4-dionato)-di-copper(ii) bromopentane solvate).	1:1	2	1	κ1	M1	2	none	pyrazol, acetylacetonato	increases connectivity	heterocyclic N-oxide and co-ligand	A*M1	A*B01)2*M1	A*B2*B01)2	0D	1D	1	none	1,2M3-1	2C1
SOHTIT05	V.I.Ovcharenko,G.V.Romanenko,K.Yu.Maryunina,A.S.Bogomyakov,E.V.Gorelik INORG.CHEM.,2008,47,9537	catena-(bis(\m~2~-4,4,5,5-Tetramethyl-2-(1-butylpyrazole-4-yl)-4,5-dihydro-1H-imidazol-3-oxide-1-oxyl)-tetrakis(1,1,1,5,5,5-hexafluoropentan-2,4-dionato)-di-copper(ii) bromopentane solvate).	1:1	2	1	κ1	M1	2	none	pyrazol, acetylacetonato	increases connectivity	heterocyclic N-oxide and co-ligand	A*M1	A*B01)2*M1	A*B2*B01)2	0D	1D	1	none	1,2M3-1	2C1
SOHTOZ	V.I.Ovcharenko,G.V.Romanenko,K.Yu.Maryunina,A.S.Bogomyakov,E.V.Gorelik INORG.CHEM.,2008,47,9537	catena-(tetrakis(\m~2~-4,4,5,5-Tetramethyl-2-(1-butylpyrazole-4-yl)-4,5-dihydro-1H-imidazol-3-oxide-1-oxyl)-octakis(1,1,1,5,5,5-hexafluoropentan-2,4-dionato)-tetra-copper(ii) chloropentane solvate).	1:1	2	1	κ1	M1	2	none	pyrazol, acetylacetonato	increases connectivity	heterocyclic N-oxide and co-ligand	A*M1	A*B01)2*M1	A*B2*B01)2	0D	1D	1	none	1,2M3-1	2C1
SOHTOZ01	V.I.Ovcharenko,G.V.Romanenko,K.Yu.Maryunina,A.S.Bogomyakov,E.V.Gorelik INORG.CHEM.,2008,47,9537	catena-(tetrakis(\m~2~-4,4,5,5-Tetramethyl-2-(1-butylpyrazole-4-yl)-4,5-dihydro-1H-imidazol-3-oxide-1-oxyl)-octakis(1,1,1,5,5,5-hexafluoropentan-2,4-dionato)-tetra-copper(ii) chloropentane solvate).	1:1	2	1	κ1	M1	2	none	pyrazol, acetylacetonato	increases connectivity	heterocyclic N-oxide and co-ligand	A*M1	A*B01)2*M1	A*B2*B01)2	0D	1D	1	none	1,2M3-1	2C1
SOHTOZ02	V.I.Ovcharenko,G.V.Romanenko,K.Yu.Maryunina,A.S.Bogomyakov,E.V.Gorelik INORG.CHEM.,2008,47,9537	catena-(bis(\m~2~-4,4,5,5-Tetramethyl-2-(1-butylpyrazole-4-yl)-4,5-dihydro-1H-imidazol-3-oxide-1-oxyl)-tetrakis(1,1,1,5,5,5-hexafluoropentan-2,4-dionato)-di-copper(ii) chloropentane solvate).	1:1	2	1	κ1	M1	2	none	pyrazol, acetylacetonato	increases connectivity	heterocyclic N-oxide and co-ligand	A*M1	A*B01)2*M1	A*B2*B01)2	0D	1D	1	none	1,2M3-1	2C1
SOHTOZ03	V.I.Ovcharenko,G.V.Romanenko,K.Yu.Maryunina,A.S.Bogomyakov,E.V.Gorelik INORG.CHEM.,2008,47,9537	catena-(bis(\m~2~-4,4,5,5-Tetramethyl-2-(1-butylpyrazole-4-yl)-4,5-dihydro-1H-imidazol-3-oxide-1-oxyl)-tetrakis(1,1,1,5,5,5-hexafluoropentan-2,4-dionato)-di-copper(ii) chloropentane solvate).	1:1	2	1	κ1	M1	2	none	pyrazol, acetylacetonato	increases connectivity	heterocyclic N-oxide and co-ligand	A*M1	A*B01)2*M1	A*B2*B01)2	0D	1D	1	none	1,2M3-1	2C1
SOHTOZ04	V.I.Ovcharenko,G.V.Romanenko,K.Yu.Maryunina,A.S.Bogomyakov,E.V.Gorelik INORG.CHEM.,2008,47,9537	catena-(bis(\m~2~-4,4,5,5-Tetramethyl-2-(1-butylpyrazole-4-yl)-4,5-dihydro-1H-imidazol-3-oxide-1-oxyl)-tetrakis(1,1,1,5,5,5-hexafluoropentan-2,4-dionato)-di-copper(ii) chloropentane solvate).	1:1	2	1	κ1	M1	2	none	pyrazol, acetylacetonato	increases connectivity	heterocyclic N-oxide and co-ligand	A*M1	A*B01)2*M1	A*B2*B01)2	0D	1D	1	none	1,2M3-1	2C1
SOHTOZ05	V.I.Ovcharenko,G.V.Romanenko,K.Yu.Maryunina,A.S.Bogomyakov,E.V.Gorelik INORG.CHEM.,2008,47,9537	catena-(bis(\m~2~-4,4,5,5-Tetramethyl-2-(1-butylpyrazole-4-yl)-4,5-dihydro-1H-imidazol-3-oxide-1-oxyl)-tetrakis(1,1,1,5,5,5-hexafluoropentan-2,4-dionato)-di-copper(ii) chloropentane solvate).	1:1	2	1	κ1	M1	2	none	pyrazol, acetylacetonato	increases connectivity	heterocyclic N-oxide and co-ligand	A*M1	A*B01)2*M1	A*B2*B01)2	0D	1D	1	none	1,2M3-1	2C1
SOHTOZ06	V.I.Ovcharenko,G.V.Romanenko,K.Yu.Maryunina,A.S.Bogomyakov,E.V.Gorelik INORG.CHEM.,2008,47,9537	catena-(bis(\m~2~-4,4,5,5-Tetramethyl-2-(1-butylpyrazole-4-yl)-4,5-dihydro-1H-imidazol-3-oxide-1-oxyl)-tetrakis(1,1,1,5,5,5-hexafluoropentan-2,4-dionato)-di-copper(ii) chloropentane solvate).	1:1	2	1	κ1	M1	2	none	pyrazol, acetylacetonato	increases connectivity	heterocyclic N-oxide and co-ligand	A*M1	A*B01)2*M1	A*B2*B01)2	0D	1D	1	none	1,2M3-1	2C1
SOHTUF	V.I.Ovcharenko,G.V.Romanenko,K.Yu.Maryunina,A.S.Bogomyakov,E.V.Gorelik INORG.CHEM.,2008,47,9537	catena-(bis(\m~2~-4,4,5,5-Tetramethyl-2-(1-butylpyrazole-4-yl)-4,5-dihydro-1H-imidazol-3-oxide-1-oxyl)-tetrakis(1,1,1,5,5,5-hexafluoropentan-2,4-dionato)-di-copper(ii) iodopentane solvate).	1:1	2	1	κ1	M1	2	none	pyrazol, acetylacetonato	increases connectivity	heterocyclic N-oxide and co-ligand	A*M1	A*B01)2*M1	A*B2*B01)2	0D	1D	1	none	1,2M3-1	2C1
SOHTUF01	V.I.Ovcharenko,G.V.Romanenko,K.Yu.Maryunina,A.S.Bogomyakov,E.V.Gorelik INORG.CHEM.,2008,47,9537	catena-(bis(\m~2~-4,4,5,5-Tetramethyl-2-(1-butylpyrazole-4-yl)-4,5-dihydro-1H-imidazol-3-oxide-1-oxyl)-tetrakis(1,1,1,5,5,5-hexafluoropentan-2,4-dionato)-di-copper(ii) iodopentane solvate).	1:1	2	1	κ1	M1	2	none	pyrazol, acetylacetonato	increases connectivity	heterocyclic N-oxide and co-ligand	A*M1	A*B01)2*M1	A*B2*B01)2	0D	1D	1	none	1,2M3-1	2C1
SOHTUF02	V.I.Ovcharenko,G.V.Romanenko,K.Yu.Maryunina,A.S.Bogomyakov,E.V.Gorelik INORG.CHEM.,2008,47,9537	catena-(bis(\m~2~-4,4,5,5-Tetramethyl-2-(1-butylpyrazole-4-yl)-4,5-dihydro-1H-imidazol-3-oxide-1-oxyl)-tetrakis(1,1,1,5,5,5-hexafluoropentan-2,4-dionato)-di-copper(ii) iodopentane solvate).	1:1	2	1	κ1	M1	2	none	pyrazol, acetylacetonato	increases connectivity	heterocyclic N-oxide and co-ligand	A*M1	A*B01)2*M1	A*B2*B01)2	0D	1D	1	none	1,2M3-1	2C1
SOHTUF03	V.I.Ovcharenko,G.V.Romanenko,K.Yu.Maryunina,A.S.Bogomyakov,E.V.Gorelik INORG.CHEM.,2008,47,9537	catena-(bis(\m~2~-4,4,5,5-Tetramethyl-2-(1-butylpyrazole-4-yl)-4,5-dihydro-1H-imidazol-3-oxide-1-oxyl)-tetrakis(1,1,1,5,5,5-hexafluoropentan-2,4-dionato)-di-copper(ii) iodopentane solvate).	1:1	2	1	κ1	M1	2	none	pyrazol, acetylacetonato	increases connectivity	heterocyclic N-oxide and co-ligand	A*M1	A*B01)2*M1	A*B2*B01)2	0D	1D	1	none	1,2M3-1	2C1
SOHTUF04	V.I.Ovcharenko,G.V.Romanenko,K.Yu.Maryunina,A.S.Bogomyakov,E.V.Gorelik INORG.CHEM.,2008,47,9537	catena-(bis(\m~2~-4,4,5,5-Tetramethyl-2-(1-butylpyrazole-4-yl)-4,5-dihydro-1H-imidazol-3-oxide-1-oxyl)-tetrakis(1,1,1,5,5,5-hexafluoropentan-2,4-dionato)-di-copper(ii) iodopentane solvate).	1:1	2	1	κ1	M1	2	none	pyrazol, acetylacetonato	increases connectivity	heterocyclic N-oxide and co-ligand	A*M1	A*B01)2*M1	A*B2*B01)2	0D	1D	1	none	1,2M3-1	2C1
SOLBAW	A.Caneschi,F.Ferraro,D.Gatteschi,P.Rey,R.Sessoli INORG.CHEM.,1991,30,3162	catena(bis(\m~3~-2-(4-Pyridyl)-4,4,5,5-tetramethylimidazoline-1-oxyl3-oxide-N',O,O')-tris(bis(hexafluoroacetylacetonato-O,O')-copper(ii))).	3:2	2	2	κ1	B2	2, 1	none	acetylacetonato, pyridyl	increases connectivity	heterocyclic N-oxide and co-ligand	A)3*B2)2	A)3*B01)6*M1)2	A)3*T3)2*B01)6	0D	1D	3	none	1,2,2M5-1	2,2,3C6
SOMDAA	V.I.Ovcharenko,G.V.Romanenko,K.Yu.Maryunina,A.S.Bogomyakov,E.V.Gorelik INORG.CHEM.,2008,47,9537	catena-(bis(\m~2~-4,4,5,5-Tetramethyl-2-(1-butylpyrazole-4-yl)-4,5-dihydro-1H-imidazol-3-oxide-1-oxyl)-tetrakis(1,1,1,5,5,5-hexafluoropentan-2,4-dionato)-di-copper(ii) heptane solvate).	1:1	2	1	κ1	M1	2	none	pyrazol, acetylacetonato	increases connectivity	heterocyclic N-oxide and co-ligand	A*M1	A*B01)2*M1	A*B2*B01)2	0D	1D	1	none	1,2M3-1	2C1
SOMDAA01	V.I.Ovcharenko,G.V.Romanenko,K.Yu.Maryunina,A.S.Bogomyakov,E.V.Gorelik INORG.CHEM.,2008,47,9537	catena-(bis(\m~2~-4,4,5,5-Tetramethyl-2-(1-butylpyrazole-4-yl)-4,5-dihydro-1H-imidazol-3-oxide-1-oxyl)-tetrakis(1,1,1,5,5,5-hexafluoropentan-2,4-dionato)-di-copper(ii) heptane solvate).	1:1	2	1	κ1	M1	2	none	pyrazol, acetylacetonato	increases connectivity	heterocyclic N-oxide and co-ligand	A*M1	A*B01)2*M1	A*B2*B01)2	0D	1D	1	none	1,2M3-1	2C1
SOMDAA02	V.I.Ovcharenko,G.V.Romanenko,K.Yu.Maryunina,A.S.Bogomyakov,E.V.Gorelik INORG.CHEM.,2008,47,9537	catena-(bis(\m~2~-4,4,5,5-Tetramethyl-2-(1-butylpyrazole-4-yl)-4,5-dihydro-1H-imidazol-3-oxide-1-oxyl)-tetrakis(1,1,1,5,5,5-hexafluoropentan-2,4-dionato)-di-copper(ii) heptane solvate).	1:1	2	1	κ1	M1	2	none	pyrazol, acetylacetonato	increases connectivity	heterocyclic N-oxide and co-ligand	A*M1	A*B01)2*M1	A*B2*B01)2	0D	1D	1	none	1,2M3-1	2C1
SOMDAA03	V.I.Ovcharenko,G.V.Romanenko,K.Yu.Maryunina,A.S.Bogomyakov,E.V.Gorelik INORG.CHEM.,2008,47,9537	catena-(bis(\m~2~-4,4,5,5-Tetramethyl-2-(1-butylpyrazole-4-yl)-4,5-dihydro-1H-imidazol-3-oxide-1-oxyl)-tetrakis(1,1,1,5,5,5-hexafluoropentan-2,4-dionato)-di-copper(ii) heptane solvate).	1:1	2	1	κ1	M1	2	none	pyrazol, acetylacetonato	increases connectivity	heterocyclic N-oxide and co-ligand	A*M1	A*B01)2*M1	A*B2*B01)2	0D	1D	1	none	1,2M3-1	2C1
SOPQAP	T.Origuchi,W.Fujita,A.Yamaguchi,T.Okuno,K.Awaga,H.Yano,N.Wada MOL.CRYST.LIQ.CRYST.SCI.TECHNOL.,SECT.A,1997,296,281	catena-bis((\m~2~-4,4,5,5-Tetramethyl-2-(p-nitrophenyl)-imidazoline-1,3-dioxide radical)-(hexafluoroacetylacetonato)-copper(ii)). catena-bis((mu!2$-2,3-Dimethylbutane-2,3-(p-nitrophenyl alpha-nitronylnitroxide) radical)-(hexafluoroacetylacetonato)-copper(ii)).	1:1	2	2	κ1	B2	2	none	acetylacetonato	terminal	co-ligand	A*B2	A*B01)2	A*B2*B01)2	1D	1D	none	none	2C1	2C1
SUKBUV	A.Caneschi,P.Chiesi,L.David,F.Ferraro,D.Gatteschi,R.Sessoli INORG.CHEM.,1993,32,1445	(\m~4~-1,4-bis(1'-Oxyl-3'-oxido-4',4',5',5'-tetramethyl-4,'5'-dihydro-1H-imidazol-2'-yl)benzene)-tetrakis(bis(hexafluoroacetylacetonato)-copper(ii)).	4:1	4	4	κ1	K4	1	none	acetylacetonato	increases connectivity	co-ligand	A)4*K4	A*B01)2	A)4*K4*B01)8	0D	0D	1	4	1,4M5-1	1,3,4M13-1
SUKCAC	A.Caneschi,P.Chiesi,L.David,F.Ferraro,D.Gatteschi,R.Sessoli INORG.CHEM.,1993,32,1445	catena-((\m~4~-1,3-bis(1'-Oxyl-3'-oxido-4',4',5',5'-tetramethyl-4,'5'-dihydro-1H-imidazol-2'-yl)benzene)-tris(bis(hexafluoroacetylacetonato)-copper(ii))).	3:1	4	4	κ1	K4	2, 1	none	acetylacetonato	terminal	co-ligand	A)3*K4	A*B01)2	A)3*K4*B01)6	1D	1D	none	none	1,2,4-c net new3 (2C1)	2C1
SULHUC	E.Ressouche,J.-X.Boucherle,B.Gillon,P.Rey,J.Schweizer J.AM.CHEM.SOC.,1993,115,3610	catena-((\m~2~-2,4,4,5,5-Pentamethyl-4,5-dihydro-1H-imidazolyl-1-oxyl3-oxide-O,O')-bis(hexafluoroacetylacetonato)-copper(ii)).	1:1	2	2	κ1	B2	2	none	acetylacetonato	terminal	co-ligand	A*B2	A*B01)2	A*B2*B01)2	1D	1D	none	none	2C1	2C1
TEBTAW	Jing-Min Shi,You-Min Sun,Zhe Liu,Lian-Dong Liu,Wei Shi,Peng Cheng DALTON TRANS.,2006,376	catena-(bis(\m~2~-Isothiocyanato-N,S)-(4-methylpyridine N-oxide)-copper(ii)).	1:1	1	1	κ1	M1	1	none	Isothiocyanato	increases connectivity	co-ligand	A*M1	A*B2*M1	A*B2*M1)2	0D	0D	1	2	1M2-1	1,2,4M8-3
TEPZIY	K.Maryunina,S.Fokin,V.Ovcharenko,G.Romanenko,V.Ikorskii POLYHEDRON,2005,24,2094	catena-(bis(\m~2~-4,4,5,5-Tetramethyl-2-(1-ethylpyrazole-4-yl)-4,5-dihydro-1H-imidazol-3-oxide-1-oxyl)-tetrakis(1,1,1,5,5,5-hexafluoropentan-2,4-dionato)-di-copper(ii)).	1:1	2	1	κ1	M1	2	none	acetylacetonato, pyrazole	increases connectivity	heterocyclic N-oxide and co-ligand	A*M1	A*B01)2*M1	A*B2*B01)2	0D	1D	1	none	1,2M3-1	2C1
TEPZIY01	K.Maryunina,S.Fokin,V.Ovcharenko,G.Romanenko,V.Ikorskii POLYHEDRON,2005,24,2094	catena-(bis(\m~2~-4,4,5,5-Tetramethyl-2-(1-ethylpyrazole-4-yl)-4,5-dihydro-1H-imidazol-3-oxide-1-oxyl)-tetrakis(1,1,1,5,5,5-hexafluoropentan-2,4-dionato)-di-copper(ii)).	1:1	2	1	κ1	M1	2	none	acetylacetonato, pyrazole	increases connectivity	heterocyclic N-oxide and co-ligand	A*M1	A*B01)2*M1	A*B2*B01)2	0D	1D	1	none	1,2M3-1	2C1
TEPZIY02	K.Maryunina,S.Fokin,V.Ovcharenko,G.Romanenko,V.Ikorskii POLYHEDRON,2005,24,2094	catena-(bis(\m~2~-4,4,5,5-Tetramethyl-2-(1-ethylpyrazole-4-yl)-4,5-dihydro-1H-imidazol-3-oxide-1-oxyl)-tetrakis(1,1,1,5,5,5-hexafluoropentan-2,4-dionato)-di-copper(ii)).	1:1	2	1	κ1	M1	2	none	acetylacetonato, pyrazole	increases connectivity	heterocyclic N-oxide and co-ligand	A*M1	A*B01)2*M1	A*B2*B01)2	0D	1D	1	none	1,2M3-1	2C1
TEPZIY03	K.Maryunina,S.Fokin,V.Ovcharenko,G.Romanenko,V.Ikorskii POLYHEDRON,2005,24,2094	catena-(bis(\m~2~-4,4,5,5-Tetramethyl-2-(1-ethylpyrazole-4-yl)-4,5-dihydro-1H-imidazol-3-oxide-1-oxyl)-tetrakis(1,1,1,5,5,5-hexafluoropentan-2,4-dionato)-di-copper(ii)).	1:1	2	1	κ1	M1	2	none	acetylacetonato, pyrazole	increases connectivity	heterocyclic N-oxide and co-ligand	A*M1	A*B01)2*M1	A*B2*B01)2	0D	1D	1	none	1,2M3-1	2C1
TEPZIY04	K.Maryunina,S.Fokin,V.Ovcharenko,G.Romanenko,V.Ikorskii POLYHEDRON,2005,24,2094	catena-(bis(\m~2~-4,4,5,5-Tetramethyl-2-(1-ethylpyrazole-4-yl)-4,5-dihydro-1H-imidazol-3-oxide-1-oxyl)-tetrakis(1,1,1,5,5,5-hexafluoropentan-2,4-dionato)-di-copper(ii)).	1:1	2	1	κ1	M1	2	none	acetylacetonato, pyrazole	increases connectivity	heterocyclic N-oxide and co-ligand	A*M1	A*B01)2*M1	A*B2*B01)2	0D	1D	1	none	1,2M3-1	2C1
TEPZIY05	K.Maryunina,S.Fokin,V.Ovcharenko,G.Romanenko,V.Ikorskii POLYHEDRON,2005,24,2094	catena-(bis(\m~2~-4,4,5,5-Tetramethyl-2-(1-ethylpyrazole-4-yl)-4,5-dihydro-1H-imidazol-3-oxide-1-oxyl)-tetrakis(1,1,1,5,5,5-hexafluoropentan-2,4-dionato)-di-copper(ii)).	1:1	2	1	κ1	M1	2	none	acetylacetonato, pyrazole	increases connectivity	heterocyclic N-oxide and co-ligand	A*M1	A*B01)2*M1	A*B2*B01)2	0D	1D	1	none	1,2M3-1	2C1
TEPZOE	K.Maryunina,S.Fokin,V.Ovcharenko,G.Romanenko,V.Ikorskii POLYHEDRON,2005,24,2094	catena-(bis(\m~2~-4,4,5,5-Tetramethyl-2-(1-ethylpyrazole-4-yl)-4,5-dihydro-1H-imidazol-3-oxide-1-oxyl)-tetrakis(1,1,1,5,5,5-hexafluoropentan-2,4-dionato)-di-copper(ii)).	1:1	2	1	κ1	M1	2	none	acetylacetonato, pyrazole	increases connectivity	heterocyclic N-oxide and co-ligand	A*M1	A*B01)2*M1	A*B2*B01)2	0D	1D	1	none	1,2M3-1	2C1
TEPZOE01	K.Maryunina,S.Fokin,V.Ovcharenko,G.Romanenko,V.Ikorskii POLYHEDRON,2005,24,2094	catena-(bis(\m~2~-4,4,5,5-Tetramethyl-2-(1-ethylpyrazole-4-yl)-4,5-dihydro-1H-imidazol-3-oxide-1-oxyl)-tetrakis(1,1,1,5,5,5-hexafluoropentan-2,4-dionato)-di-copper(ii)).	1:1	2	1	κ1	M1	2	none	acetylacetonato, pyrazole	increases connectivity	heterocyclic N-oxide and co-ligand	A*M1	A*B01)2*M1	A*B2*B01)2	0D	1D	1	none	1,2M3-1	2C1
TEPZOE02	K.Maryunina,S.Fokin,V.Ovcharenko,G.Romanenko,V.Ikorskii POLYHEDRON,2005,24,2094	catena-(bis(\m~2~-4,4,5,5-Tetramethyl-2-(1-ethylpyrazole-4-yl)-4,5-dihydro-1H-imidazol-3-oxide-1-oxyl)-tetrakis(1,1,1,5,5,5-hexafluoropentan-2,4-dionato)-di-copper(ii)).	1:1	2	1	κ1	M1	2	none	acetylacetonato, pyrazole	increases connectivity	heterocyclic N-oxide and co-ligand	A*M1	A*B01*M1)3	A*B2*B01)2	0D	1D	1	none	1,2M3-1	2C1
TEPZUK	K.Maryunina,S.Fokin,V.Ovcharenko,G.Romanenko,V.Ikorskii POLYHEDRON,2005,24,2094	catena-(bis(\m~2~-4,4,5,5-Tetramethyl-2-(1-ethylpyrazole-4-yl)-4,5-dihydro-1H-imidazol-3-oxide-1-oxyl)-tetrakis(1,1,1,5,5,5-hexafluoropentan-2,4-dionato)-di-copper(ii)).	1:1	2	1	κ1	M1	2	none	acetylacetonato, pyrazole	increases connectivity	heterocyclic N-oxide and co-ligand	A*M1	A*B01)2*M1	A*B2*B01)2	0D	1D	1	none	1,2M3-1	2C1
TEPZUK01	K.Maryunina,S.Fokin,V.Ovcharenko,G.Romanenko,V.Ikorskii POLYHEDRON,2005,24,2094	catena-(bis(\m~2~-4,4,5,5-Tetramethyl-2-(1-ethylpyrazole-4-yl)-4,5-dihydro-1H-imidazol-3-oxide-1-oxyl)-tetrakis(1,1,1,5,5,5-hexafluoropentan-2,4-dionato)-di-copper(ii)).	1:1	2	1	κ1	M1	2	none	acetylacetonato, pyrazole	increases connectivity	heterocyclic N-oxide and co-ligand	A*M1	A*B01*M1)3	A*B2*B01)2	0D	1D	1	none	1,2M3-1	2C1
TEPZUK02	K.Maryunina,S.Fokin,V.Ovcharenko,G.Romanenko,V.Ikorskii POLYHEDRON,2005,24,2094	catena-(bis(\m~2~-4,4,5,5-Tetramethyl-2-(1-ethylpyrazole-4-yl)-4,5-dihydro-1H-imidazol-3-oxide-1-oxyl)-tetrakis(1,1,1,5,5,5-hexafluoropentan-2,4-dionato)-di-copper(ii)).	1:1	2	1	κ1	M1	2	none	acetylacetonato, pyrazole	increases connectivity	heterocyclic N-oxide and co-ligand	A*M1	A*M1)5	A*B2*B01)2	0D	1D	1	none	1,2M3-1	2C1
TEPZUK03	K.Maryunina,S.Fokin,V.Ovcharenko,G.Romanenko,V.Ikorskii POLYHEDRON,2005,24,2094	catena-(bis(\m~2~-4,4,5,5-Tetramethyl-2-(1-ethylpyrazole-4-yl)-4,5-dihydro-1H-imidazol-3-oxide-1-oxyl)-tetrakis(1,1,1,5,5,5-hexafluoropentan-2,4-dionato)-di-copper(ii)).	1:1	2	1	κ1	M1	2	none	acetylacetonato, pyrazole	increases connectivity	heterocyclic N-oxide and co-ligand	A*M1	A*M1)5	A*B2*B01)2	0D	1D	1	none	1,2M3-1	2C1
TEPZUK04	K.Maryunina,S.Fokin,V.Ovcharenko,G.Romanenko,V.Ikorskii POLYHEDRON,2005,24,2094	catena-(bis(\m~2~-4,4,5,5-Tetramethyl-2-(1-ethylpyrazole-4-yl)-4,5-dihydro-1H-imidazol-3-oxide-1-oxyl)-tetrakis(1,1,1,5,5,5-hexafluoropentan-2,4-dionato)-di-copper(ii)).	1:1	2	1	κ1	M1	2	none	pyrazol	increases connectivity	heterocyclic N-oxide and co-ligand	A*M1	A*B01)2*M1	A*B2*B01)2	0D	1D	1	none	1,2M3-1	2C1
TEPZUK05	K.Maryunina,S.Fokin,V.Ovcharenko,G.Romanenko,V.Ikorskii POLYHEDRON,2005,24,2094	catena-(bis(\m~2~-4,4,5,5-Tetramethyl-2-(1-ethylpyrazole-4-yl)-4,5-dihydro-1H-imidazol-3-oxide-1-oxyl)-tetrakis(1,1,1,5,5,5-hexafluoropentan-2,4-dionato)-di-copper(ii)).	1:1	2	1	κ1	M1	2	none	pyrazol	increases connectivity	heterocyclic N-oxide and co-ligand	A*M1	A*B01)2*M1	A*B2*B01)2	0D	1D	1	none	1,2M3-1	2C1
TEPZUK06	K.Maryunina,S.Fokin,V.Ovcharenko,G.Romanenko,V.Ikorskii POLYHEDRON,2005,24,2094	catena-(bis(\m~2~-4,4,5,5-Tetramethyl-2-(1-ethylpyrazole-4-yl)-4,5-dihydro-1H-imidazol-3-oxide-1-oxyl)-tetrakis(1,1,1,5,5,5-hexafluoropentan-2,4-dionato)-di-copper(ii)).	1:1	2	1	κ1	M1	2	none	pyrazol	increases connectivity	heterocyclic N-oxide and co-ligand	A*M1	A*B01)2*M1	A*B2*B01)2	0D	1D	1	none	1,2M3-1	2C1
TEPZUK07	K.Maryunina,S.Fokin,V.Ovcharenko,G.Romanenko,V.Ikorskii POLYHEDRON,2005,24,2094	catena-(bis(\m~2~-4,4,5,5-Tetramethyl-2-(1-ethylpyrazole-4-yl)-4,5-dihydro-1H-imidazol-3-oxide-1-oxyl)-tetrakis(1,1,1,5,5,5-hexafluoropentan-2,4-dionato)-di-copper(ii)).	1:1	2	1	κ1	M1	2	none	pyrazol	increases connectivity	heterocyclic N-oxide and co-ligand	A*M1	A*B01*M1)3	A*B2*B01*M1)2	0D	1D	1	none	1,2M3-1	2C1
TEPZUK08	K.Maryunina,S.Fokin,V.Ovcharenko,G.Romanenko,V.Ikorskii POLYHEDRON,2005,24,2094	catena-(bis(\m~2~-4,4,5,5-Tetramethyl-2-(1-ethylpyrazole-4-yl)-4,5-dihydro-1H-imidazol-3-oxide-1-oxyl)-tetrakis(1,1,1,5,5,5-hexafluoropentan-2,4-dionato)-di-copper(ii)).	1:1	2	1	κ1	M1	2	none	pyrazol	increases connectivity	heterocyclic N-oxide and co-ligand	A*M1	A*B01)2*M1	A*B2*B01)2	0D	1D	1	none	1,2M3-1	2C1
TEWMEO	Jing-Min Shi,Hai-Yan Xu,Feng-Xia Zhang,Chang-Ju Wu,Lian-Dong Liu Jiegou Huaxue(Chin.)(Chin.J.Struct.Chem.),2007,26,214	catena-(tris(\m~2~-Pyrazine-1,4-dioxide)-tetrakis(perchlorato-O)-diaqua-di-copper(ii) monohydrate).	2:3	2	2	κ1	B2	3	none	water, perchlorato	terminal	co-ligand	A)2*B2)3	A*M1)3	A)2*B2)3*M1)6	2D	2D	none	none	2,3L1(hcb)	hcb
TIFXOW	M.R.Montney,R.L.LaDuca ACTA CRYSTALLOGR.,SECT.E:STRUCT.REP.ONLINE,2007,63,m2166	Diaqua-((Z)-4,4'-ethylenedipyridine N,N'-dioxide-O)-(malonato-O,O)-copper(ii)trihydrate.	1:1	2	1	κ1	M1	1	none	acetylacetonato, water	terminal	co-ligand	A*M1	A*B01*M1)2	A*B01*M1)3	0D	0D	1	1	1M2-1	1,4M5-1
TIHMUU	K.N.Sedenkova,E.B.Averina,Y.K.Grishin,A.G.Kutateladze,V.B.Rybakov,T.S.Kuznetsova,N.S.Zefirov J.ORG.CHEM.,2012,77,9893	bis(4-Fluoro-2-methyl-5,6,7,8-tetrahydro-1-quinazolin-1-oxy)-dichloro-copper(ii).	1:2	1	1	κ1	M1	2	none	chloro	terminal	co-ligand	A*M1)2	A*M1)2	A*M1)4	0D	0D	1	1	1,2M3-1	1,4M5-1
TILDOI	Jing-Min Shi,Xia Zhang,Chang-Ju Wu,Wei Shi,Lian-Dong Liu J.Coord.Chem.,2007,60,1827	catena-((\m~2~-2,5-dimethylpyrazine-1,4-dioxide)-di-isothiocyanato-copper(ii)).	1:1	2	2	κ1	B2	2	none	Isothiocyanato	terminal	co-ligand	A*B2	A*M1)2	A*B2*M1)2	1D	1D	none	none	2C1	2C1
TISNOB	Zhengao FENG,Allred T.K.,Hurlow E.E.,Harran P.G. J.AM.CHEM.SOC.,2019,141,2274	bis(nitrato)-bis(14-oxo-14-azabicyclo[8.3.1]tetradeca-1(14),10,12-triene)-copper.	1:2	1	1	κ1	M1	2	none	nitrato	terminal	co-ligand	A*M1)2	A*B01)2	A*B01)2*M1)2	0D	0D	1	1	1,2M3-1	1,4M5-1
TIZWIK	S.Tolstikov,E.Tretyakov,S.Fokin,E.Suturina,G.Romanenko,A.Bogomyakov,D.Stass,A.Maryasov,M.Fedin,N.Gritsan,V.Ovcharenko Chem.-Eur.J.,2014,20,2793	(\m~2~-2-([t-butyl(hydroxy)amino](1-hydroxy-4,4,5,5-tetramethyl-3-oxido-4,5-dihydro-1H-imidazol-2-yl)methylidene)-3-hydroxy-4,4,5,5-tetramethylimidazolidin-1-olato)-tetrakis(1,1,1,5,5,5-hexafluoroacetylacetonato)-aqua-di-copper.	2:1	4	2	κ1	B2	1	none	acetylacetonato, water	increases connectivity	co-ligand	A)2*B2	A)2*B01)4*M1	A)2*B2*B01)4*M1	0D	0D	1	2	1,2M3-1	1,1,2,3,4M8-2
TIZWIK01	S.Tolstikov,E.Tretyakov,S.Fokin,E.Suturina,G.Romanenko,A.Bogomyakov,D.Stass,A.Maryasov,M.Fedin,N.Gritsan,V.Ovcharenko Chem.-Eur.J.,2014,20,2793	(\m~2~-2-([t-butyl(hydroxy)amino](1-hydroxy-4,4,5,5-tetramethyl-3-oxido-4,5-dihydro-1H-imidazol-2-yl)methylidene)-3-hydroxy-4,4,5,5-tetramethylimidazolidin-1-olato)-tetrakis(1,1,1,5,5,5-hexafluoroacetylacetonato)-aqua-di-copper.	2:1	4	2	κ1	B2	1	none	acetylacetonato, water	increases connectivity	co-ligand	A)2*B2	A)2*B01)4*M1	A)2*B2*B01)4*M1	0D	0D	1	2	1,2M3-1	1,1,2,3,4M8-2
TIZXIL	S.Tolstikov,E.Tretyakov,S.Fokin,E.Suturina,G.Romanenko,A.Bogomyakov,D.Stass,A.Maryasov,M.Fedin,N.Gritsan,V.Ovcharenko Chem.-Eur.J.,2014,20,2793	(\m~2~-2,2'-((t-butyl(oxido)azanylidene)methanediyl)bis(4,4,5,5-tetramethylimidazol-1-olate)3,3'-dioxide)-aqua-tetrakis(1,1,1,5,5,5-hexafluoroacetylacetonate)-di-copper(ii) bis(1,1,1,5,5,5-hexafluoroacetylacetonate)-aqua-copper(ii).	3:1	5	3	κ1	T11	2, 1	none	acetylacetonato, water	terminal	co-ligand	A)3*T11	A)3*B01)6*M1)2	A)3*T11*B01)6*M1)2	0D	0D	2	2, 1	1,2M3-1	1,1,2,3,4M8-2|1,3M4-1
TOJDEC	Hao-Ling Sun,Zhe-Ming Wang,Song Gao,S.R.Batten CRYSTENGCOMM,2008,10,1796	catena-[bis(\m~2~-1,2-bis(4-Pyridyl)ethane-N,N'-dioxide-O,O')-diaqua-copper(ii) 1,2-bis(4-pyridyl)ethane-N,N'-dioxide diperchlorate].	1:2	2	2	κ1	B2, 0D	4	none	water	terminal	co-ligand	A*B2)2	A*M1)2	A*B2)2*M1)2	2D	2D	none	none	2,4L2(sql)	sql
TUSSEF	E.G.Ferrer,P.A.M.Williams,E.E.Castellano,O.E.Piro Z.ANORG.ALLG.CHEM.,2002,628,1979	Chloro-tetrakis(pyridine-N-oxy)-copper(ii) chloride monohydrate.	1:4	1	1	κ1	M1	4	none	chloro	terminal	co-ligand	A*M1)4	A*M1	A*M1)5	0D	0D	1	1	1,4M5-1	1,5M6-1
TUXGAV	Kun-Miao Wang,Lin Du,Rui-Bing Fang,Qi-Hua Zhao J.Chem.Cryst.,2010,40,472	catena-((\m~3~-2-(4-pyridyl)-4,4,5,5-tetramethylimidazoline-1-oxyl-3-oxide)-tetrakis(hexafluoroacetylacetonato)-di-copper(ii)).	2:1	2	2	κ1	B2	2	none	acetylacetonato, pyridyl	increases connectivity	heterocyclic N-oxide and co-ligand	A)2*B2	A)2*B01)4*M1	A)2*T3*B01)4	1D	1D	none	none	2C1	2C1
UCEHOB	G.V.Romanenko,K.Yu.Maryunina,A.S.Bogomyakov,R.Z.Sagdeev,V.I.Ovcharenko INORG.CHEM.,2011,50,6597	catena-(bis(\m~2~-2-(1-n-Butylpyrazol-4-yl)-4,4,5,5-tetramethylimidazoline-1-oxyl-3-oxide-N,O)-tetrakis(1,1,1,5,5,5-hexafluoroacetylacetonato-O,O')-di-copper(ii) benzene solvate).	1:1	2	1	κ1	M1	2	none	pyrazol, acetylacetonato	increases connectivity	heterocyclic N-oxide and co-ligand	A*M1	A*B01)2*M1	A*B2*B01)2	0D	1D	1	none	1,2M3-1	2C1
UCEHOB01	G.V.Romanenko,K.Yu.Maryunina,A.S.Bogomyakov,R.Z.Sagdeev,V.I.Ovcharenko INORG.CHEM.,2011,50,6597	catena-(bis(\m~2~-2-(1-n-Butylpyrazol-4-yl)-4,4,5,5-tetramethylimidazoline-1-oxyl-3-oxide-N,O)-tetrakis(1,1,1,5,5,5-hexafluoroacetylacetonato-O,O')-di-copper(ii) benzene solvate).	1:1	2	1	κ1	M1	2	none	pyrazol, acetylacetonato	increases connectivity	heterocyclic N-oxide and co-ligand	A*M1	A*B01)2*M1	A*B2*B01)2	0D	1D	1	none	1,2M3-1	2C1
UCEHOB02	G.V.Romanenko,K.Yu.Maryunina,A.S.Bogomyakov,R.Z.Sagdeev,V.I.Ovcharenko INORG.CHEM.,2011,50,6597	catena-(bis(\m~2~-2-(1-n-Butylpyrazol-4-yl)-4,4,5,5-tetramethylimidazoline-1-oxyl-3-oxide-N,O)-tetrakis(1,1,1,5,5,5-hexafluoroacetylacetonato-O,O')-di-copper(ii) benzene solvate).	1:1	2	1	κ1	M1	2	none	pyrazol, acetylacetonato	increases connectivity	heterocyclic N-oxide and co-ligand	A*M1	A*B01)2*M1	A*B2*B01)2	0D	1D	1	none	1,2M3-1	2C1
UCEHOB03	G.V.Romanenko,K.Yu.Maryunina,A.S.Bogomyakov,R.Z.Sagdeev,V.I.Ovcharenko INORG.CHEM.,2011,50,6597	catena-(bis(\m~2~-2-(1-n-Butylpyrazol-4-yl)-4,4,5,5-tetramethylimidazoline-1-oxyl-3-oxide-N,O)-tetrakis(1,1,1,5,5,5-hexafluoroacetylacetonato-O,O')-di-copper(ii) benzene solvate).	1:1	2	1	κ1	M1	2	none	pyrazol, acetylacetonato	increases connectivity	heterocyclic N-oxide and co-ligand	A*M1	A*B01)2*M1	A*B2*B01)2	0D	1D	1	none	1,2M3-1	2C1
UCEJIX	G.V.Romanenko,K.Yu.Maryunina,A.S.Bogomyakov,R.Z.Sagdeev,V.I.Ovcharenko INORG.CHEM.,2011,50,6597	catena-(bis(\m~2~-2-(1-n-Butylpyrazol-4-yl)-4,4,5,5-tetramethylimidazoline-1-oxyl-3-oxide-N,O)-tetrakis(1,1,1,5,5,5-hexafluoroacetylacetonato-O,O')-di-copper(ii) toluene solvate).	1:1	2	1	κ1	M1	2	none	pyrazol, acetylacetonato	increases connectivity	heterocyclic N-oxide and co-ligand	A*M1	A*B01)2*M1	A*B2*B01)2	0D	1D	1	none	1,2M3-1	2C1
UCEJIX01	G.V.Romanenko,K.Yu.Maryunina,A.S.Bogomyakov,R.Z.Sagdeev,V.I.Ovcharenko INORG.CHEM.,2011,50,6597	catena-(bis(\m~2~-2-(1-n-Butylpyrazol-4-yl)-4,4,5,5-tetramethylimidazoline-1-oxyl-3-oxide-N,O)-tetrakis(1,1,1,5,5,5-hexafluoroacetylacetonato-O,O')-di-copper(ii) toluene solvate).	1:1	2	1	κ1	M1	2	none	pyrazol, acetylacetonato	increases connectivity	heterocyclic N-oxide and co-ligand	A*M1	A*B01)2*M1	A*B2*B01)2	0D	1D	1	none	1,2M3-1	2C1
UCEJIX02	G.V.Romanenko,K.Yu.Maryunina,A.S.Bogomyakov,R.Z.Sagdeev,V.I.Ovcharenko INORG.CHEM.,2011,50,6597	catena-(bis(\m~2~-2-(1-n-Butylpyrazol-4-yl)-4,4,5,5-tetramethylimidazoline-1-oxyl-3-oxide-N,O)-tetrakis(1,1,1,5,5,5-hexafluoroacetylacetonato-O,O')-di-copper(ii) toluene solvate).	1:1	2	1	κ1	M1	2	none	pyrazol, acetylacetonato	increases connectivity	heterocyclic N-oxide and co-ligand	A*M1	A*B01)2*M1	A*B2*B01)2	0D	1D	1	none	1,2M3-1	2C1
UCEJIX03	G.V.Romanenko,K.Yu.Maryunina,A.S.Bogomyakov,R.Z.Sagdeev,V.I.Ovcharenko INORG.CHEM.,2011,50,6597	catena-(bis(\m~2~-2-(1-n-Butylpyrazol-4-yl)-4,4,5,5-tetramethylimidazoline-1-oxyl-3-oxide-N,O)-tetrakis(1,1,1,5,5,5-hexafluoroacetylacetonato-O,O')-di-copper(ii) toluene solvate).	1:1	2	1	κ1	M1	2	none	pyrazol, acetylacetonato	increases connectivity	heterocyclic N-oxide and co-ligand	A*M1	A*B01)2*M1	A*B2*B01)2	0D	1D	1	none	1,2M3-1	2C1
UCEKEU	G.V.Romanenko,K.Yu.Maryunina,A.S.Bogomyakov,R.Z.Sagdeev,V.I.Ovcharenko INORG.CHEM.,2011,50,6597	catena-(bis(\m~2~-2-(1-n-Butylpyrazol-4-yl)-4,4,5,5-tetramethylimidazoline-1-oxyl-3-oxide-N,O)-tetrakis(1,1,1,5,5,5-hexafluoroacetylacetonato-O,O')-di-copper(ii) ethylbenzene solvate).	1:1	2	1	κ1	M1	2	none	pyrazol, acetylacetonato	increases connectivity	heterocyclic N-oxide and co-ligand	A*M1	A*B01)2*M1	A*B2*B01)2	0D	1D	1	none	1,2M3-1	2C1
UCEKEU01	G.V.Romanenko,K.Yu.Maryunina,A.S.Bogomyakov,R.Z.Sagdeev,V.I.Ovcharenko INORG.CHEM.,2011,50,6597	catena-(bis(\m~2~-2-(1-n-Butylpyrazol-4-yl)-4,4,5,5-tetramethylimidazoline-1-oxyl-3-oxide-N,O)-tetrakis(1,1,1,5,5,5-hexafluoroacetylacetonato-O,O')-di-copper(ii) ethylbenzene solvate).	1:1	2	1	κ1	M1	2	none	pyrazol, acetylacetonato	increases connectivity	heterocyclic N-oxide and co-ligand	A*M1	A*B01)2*M1	A*B2*B01)2	0D	1D	1	none	1,2M3-1	2C1
UCEKEU02	G.V.Romanenko,K.Yu.Maryunina,A.S.Bogomyakov,R.Z.Sagdeev,V.I.Ovcharenko INORG.CHEM.,2011,50,6597	catena-(bis(\m~2~-2-(1-n-Butylpyrazol-4-yl)-4,4,5,5-tetramethylimidazoline-1-oxyl-3-oxide-N,O)-tetrakis(1,1,1,5,5,5-hexafluoroacetylacetonato-O,O')-di-copper(ii) ethylbenzene solvate).	1:1	2	1	κ1	M1	2	none	pyrazol, acetylacetonato	increases connectivity	heterocyclic N-oxide and co-ligand	A*M1	A*B01)2*M1	A*B2*B01)2	0D	1D	1	none	1,2M3-1	2C1
UCEKEU03	G.V.Romanenko,K.Yu.Maryunina,A.S.Bogomyakov,R.Z.Sagdeev,V.I.Ovcharenko INORG.CHEM.,2011,50,6597	catena-(bis(\m~2~-2-(1-n-Butylpyrazol-4-yl)-4,4,5,5-tetramethylimidazoline-1-oxyl-3-oxide-N,O)-tetrakis(1,1,1,5,5,5-hexafluoroacetylacetonato-O,O')-di-copper(ii) ethylbenzene solvate).	1:1	2	1	κ1	M1	2	none	pyrazol, acetylacetonato	increases connectivity	heterocyclic N-oxide and co-ligand	A*M1	A*B01)2*M1	A*B2*B01)2	0D	1D	1	none	1,2M3-1	2C1
UCEKEU04	G.V.Romanenko,K.Yu.Maryunina,A.S.Bogomyakov,R.Z.Sagdeev,V.I.Ovcharenko INORG.CHEM.,2011,50,6597	catena-(bis(\m~2~-2-(1-n-Butylpyrazol-4-yl)-4,4,5,5-tetramethylimidazoline-1-oxyl-3-oxide-N,O)-tetrakis(1,1,1,5,5,5-hexafluoroacetylacetonato-O,O')-di-copper(ii) ethylbenzene solvate).	1:1	2	1	κ1	M1	2	none	pyrazol, acetylacetonato	increases connectivity	heterocyclic N-oxide and co-ligand	A*M1	A*B01)2*M1	A*B2*B01)2	0D	1D	1	none	1,2M3-1	2C1
UCELEV	G.V.Romanenko,K.Yu.Maryunina,A.S.Bogomyakov,R.Z.Sagdeev,V.I.Ovcharenko INORG.CHEM.,2011,50,6597	catena-(bis(\m~2~-2-(1-n-Butylpyrazol-4-yl)-4,4,5,5-tetramethylimidazoline-1-oxyl-3-oxide-N,O)-tetrakis(1,1,1,5,5,5-hexafluoroacetylacetonato-O,O')-di-copper(ii) n-propylbenzene solvate).	1:1	2	1	κ1	M1	2	none	pyrazol, acetylacetonato	increases connectivity	heterocyclic N-oxide and co-ligand	A*M1	A*B01)2*M1	A*B2*B01)2	0D	1D	1	none	1,2M3-1	2C1
UCELEV01	G.V.Romanenko,K.Yu.Maryunina,A.S.Bogomyakov,R.Z.Sagdeev,V.I.Ovcharenko INORG.CHEM.,2011,50,6597	catena-(bis(\m~2~-2-(1-n-Butylpyrazol-4-yl)-4,4,5,5-tetramethylimidazoline-1-oxyl-3-oxide-N,O)-tetrakis(1,1,1,5,5,5-hexafluoroacetylacetonato-O,O')-di-copper(ii) n-propylbenzene solvate).	1:1	2	1	κ1	M1	2	none	pyrazol, acetylacetonato	increases connectivity	heterocyclic N-oxide and co-ligand	A*M1	A*B01)2*M1	A*B2*B01)2	0D	1D	1	none	1,2M3-1	2C1
UCELEV02	G.V.Romanenko,K.Yu.Maryunina,A.S.Bogomyakov,R.Z.Sagdeev,V.I.Ovcharenko INORG.CHEM.,2011,50,6597	catena-(bis(\m~2~-2-(1-n-Butylpyrazol-4-yl)-4,4,5,5-tetramethylimidazoline-1-oxyl-3-oxide-N,O)-tetrakis(1,1,1,5,5,5-hexafluoroacetylacetonato-O,O')-di-copper(ii) n-propylbenzene solvate).	1:1	2	1	κ1	M1	2	none	pyrazol, acetylacetonato	increases connectivity	heterocyclic N-oxide and co-ligand	A*M1	A*B01)2*M1	A*B2*B01)2	0D	1D	1	none	1,2M3-1	2C1
UCELEV03	G.V.Romanenko,K.Yu.Maryunina,A.S.Bogomyakov,R.Z.Sagdeev,V.I.Ovcharenko INORG.CHEM.,2011,50,6597	catena-(bis(\m~2~-2-(1-n-Butylpyrazol-4-yl)-4,4,5,5-tetramethylimidazoline-1-oxyl-3-oxide-N,O)-tetrakis(1,1,1,5,5,5-hexafluoroacetylacetonato-O,O')-di-copper(ii) n-propylbenzene solvate).	1:1	2	1	κ1	M1	2	none	pyrazol, acetylacetonato	increases connectivity	heterocyclic N-oxide and co-ligand	A*M1	A*B01)2*M1	A*B2*B01)2	0D	1D	1	none	1,2M3-1	2C1
UCEMAS	G.V.Romanenko,K.Yu.Maryunina,A.S.Bogomyakov,R.Z.Sagdeev,V.I.Ovcharenko INORG.CHEM.,2011,50,6597	catena-(bis(\m~2~-2-(1-n-Butylpyrazol-4-yl)-4,4,5,5-tetramethylimidazoline-1-oxyl-3-oxide-N,O)-tetrakis(1,1,1,5,5,5-hexafluoroacetylacetonato-O,O')-di-copper(ii) n-butylbenzene solvate).	1:1	2	1	κ1	M1	2	none	pyrazol, acetylacetonato	increases connectivity	heterocyclic N-oxide and co-ligand	A*M1	A*B01)2*M1	A*B2*B01)2	0D	1D	1	none	1,2M3-1	2C1
UCEMAS01	G.V.Romanenko,K.Yu.Maryunina,A.S.Bogomyakov,R.Z.Sagdeev,V.I.Ovcharenko INORG.CHEM.,2011,50,6597	catena-(bis(\m~2~-2-(1-n-Butylpyrazol-4-yl)-4,4,5,5-tetramethylimidazoline-1-oxyl-3-oxide-N,O)-tetrakis(1,1,1,5,5,5-hexafluoroacetylacetonato-O,O')-di-copper(ii) n-butylbenzene solvate).	1:1	2	1	κ1	M1	2	none	pyrazol, acetylacetonato	increases connectivity	heterocyclic N-oxide and co-ligand	A*M1	A*B01)2*M1	A*B2*B01)2	0D	1D	1	none	1,2M3-1	2C1
UCEMAS02	G.V.Romanenko,K.Yu.Maryunina,A.S.Bogomyakov,R.Z.Sagdeev,V.I.Ovcharenko INORG.CHEM.,2011,50,6597	catena-(bis(\m~2~-2-(1-n-Butylpyrazol-4-yl)-4,4,5,5-tetramethylimidazoline-1-oxyl-3-oxide-N,O)-tetrakis(1,1,1,5,5,5-hexafluoroacetylacetonato-O,O')-di-copper(ii) n-butylbenzene solvate).	1:1	2	1	κ1	M1	2	none	pyrazol, acetylacetonato	increases connectivity	heterocyclic N-oxide and co-ligand	A*M1	A*B01)2*M1	A*B2*B01)2	0D	1D	1	none	1,2M3-1	2C1
UCEMAS03	G.V.Romanenko,K.Yu.Maryunina,A.S.Bogomyakov,R.Z.Sagdeev,V.I.Ovcharenko INORG.CHEM.,2011,50,6597	catena-(bis(\m~2~-2-(1-n-Butylpyrazol-4-yl)-4,4,5,5-tetramethylimidazoline-1-oxyl-3-oxide-N,O)-tetrakis(1,1,1,5,5,5-hexafluoroacetylacetonato-O,O')-di-copper(ii) n-butylbenzene solvate).	1:1	2	1	κ1	M1	2	none	pyrazol, acetylacetonato	increases connectivity	heterocyclic N-oxide and co-ligand	A*M1	A*B01)2*M1	A*B2*B01)2	0D	1D	1	none	1,2M3-1	2C1
UCEMAS04	G.V.Romanenko,K.Yu.Maryunina,A.S.Bogomyakov,R.Z.Sagdeev,V.I.Ovcharenko INORG.CHEM.,2011,50,6597	catena-(bis(\m~2~-2-(1-n-Butylpyrazol-4-yl)-4,4,5,5-tetramethylimidazoline-1-oxyl-3-oxide-N,O)-tetrakis(1,1,1,5,5,5-hexafluoroacetylacetonato-O,O')-di-copper(ii) n-butylbenzene solvate).	1:1	2	1	κ1	M1	2	none	pyrazol, acetylacetonato	increases connectivity	heterocyclic N-oxide and co-ligand	A*M1	A*B01)2*M1	A*B2*B01)2	0D	1D	1	none	1,2M3-1	2C1
UCENAT	G.V.Romanenko,K.Yu.Maryunina,A.S.Bogomyakov,R.Z.Sagdeev,V.I.Ovcharenko INORG.CHEM.,2011,50,6597	catena-(bis(\m~2~-2-(1-n-Butylpyrazol-4-yl)-4,4,5,5-tetramethylimidazoline-1-oxyl-3-oxide-N,O)-tetrakis(1,1,1,5,5,5-hexafluoroacetylacetonato-O,O')-di-copper(ii) m-xylene solvate).	1:1	2	1	κ1	M1	2	none	pyrazol, acetylacetonato	increases connectivity	heterocyclic N-oxide and co-ligand	A*M1	A*B01)2*M1	A*B2*B01)2	0D	1D	1	none	1,2M3-1	2C1
UCENAT01	G.V.Romanenko,K.Yu.Maryunina,A.S.Bogomyakov,R.Z.Sagdeev,V.I.Ovcharenko INORG.CHEM.,2011,50,6597	catena-(bis(\m~2~-2-(1-n-Butylpyrazol-4-yl)-4,4,5,5-tetramethylimidazoline-1-oxyl-3-oxide-N,O)-tetrakis(1,1,1,5,5,5-hexafluoroacetylacetonato-O,O')-di-copper(ii) m-xylene solvate).	1:1	2	1	κ1	M1	2	none	pyrazol, acetylacetonato	increases connectivity	heterocyclic N-oxide and co-ligand	A*M1	A*B01)2*M1	A*B2*B01)2	0D	1D	1	none	1,2M3-1	2C1
UCENAT02	G.V.Romanenko,K.Yu.Maryunina,A.S.Bogomyakov,R.Z.Sagdeev,V.I.Ovcharenko INORG.CHEM.,2011,50,6597	catena-(bis(\m~2~-2-(1-n-Butylpyrazol-4-yl)-4,4,5,5-tetramethylimidazoline-1-oxyl-3-oxide-N,O)-tetrakis(1,1,1,5,5,5-hexafluoroacetylacetonato-O,O')-di-copper(ii) m-xylene solvate).	1:1	2	1	κ1	M1	2	none	pyrazol, acetylacetonato	increases connectivity	heterocyclic N-oxide and co-ligand	A*M1	A*B01)2*M1	A*B2*B01)2	0D	1D	1	none	1,2M3-1	2C1
UCENAT03	G.V.Romanenko,K.Yu.Maryunina,A.S.Bogomyakov,R.Z.Sagdeev,V.I.Ovcharenko INORG.CHEM.,2011,50,6597	catena-(bis(\m~2~-2-(1-n-Butylpyrazol-4-yl)-4,4,5,5-tetramethylimidazoline-1-oxyl-3-oxide-N,O)-tetrakis(1,1,1,5,5,5-hexafluoroacetylacetonato-O,O')-di-copper(ii) m-xylene solvate).	1:1	2	1	κ1	M1	2	none	pyrazol, acetylacetonato	increases connectivity	heterocyclic N-oxide and co-ligand	A*M1	A*B01)2*M1	A*B2*B01)2	0D	1D	1	none	1,2M3-1	2C1
UCENAT04	G.V.Romanenko,K.Yu.Maryunina,A.S.Bogomyakov,R.Z.Sagdeev,V.I.Ovcharenko INORG.CHEM.,2011,50,6597	catena-(bis(\m~2~-2-(1-n-Butylpyrazol-4-yl)-4,4,5,5-tetramethylimidazoline-1-oxyl-3-oxide-N,O)-tetrakis(1,1,1,5,5,5-hexafluoroacetylacetonato-O,O')-di-copper(ii) m-xylene solvate).	1:1	2	1	κ1	M1	2	none	pyrazol, acetylacetonato	increases connectivity	heterocyclic N-oxide and co-ligand	A*M1	A*B01)2*M1	A*B2*B01)2	0D	1D	1	none	1,2M3-1	2C1
UCEPUP	G.V.Romanenko,K.Yu.Maryunina,A.S.Bogomyakov,R.Z.Sagdeev,V.I.Ovcharenko INORG.CHEM.,2011,50,6597	catena-(bis(\m~2~-2-(1-n-Butylpyrazol-4-yl)-4,4,5,5-tetramethylimidazoline-1-oxyl-3-oxide-N,O)-tetrakis(1,1,1,5,5,5-hexafluoroacetylacetonato-O,O')-di-copper(ii) p-xylene solvate).	1:1	2	1	κ1	M1	2	none	pyrazol, acetylacetonato	increases connectivity	heterocyclic N-oxide and co-ligand	A*M1	A*B01)2*M1	A*B2*B01)2	0D	1D	1	none	1,2M3-1	2C1
UCEPUP01	G.V.Romanenko,K.Yu.Maryunina,A.S.Bogomyakov,R.Z.Sagdeev,V.I.Ovcharenko INORG.CHEM.,2011,50,6597	catena-(bis(\m~2~-2-(1-n-Butylpyrazol-4-yl)-4,4,5,5-tetramethylimidazoline-1-oxyl-3-oxide-N,O)-tetrakis(1,1,1,5,5,5-hexafluoroacetylacetonato-O,O')-di-copper(ii) p-xylene solvate).	1:1	2	1	κ1	M1	2	none	pyrazol, acetylacetonato	increases connectivity	heterocyclic N-oxide and co-ligand	A*M1	A*B01)2*M1	A*B2*B01)2	0D	1D	1	none	1,2M3-1	2C1
UCEPUP02	G.V.Romanenko,K.Yu.Maryunina,A.S.Bogomyakov,R.Z.Sagdeev,V.I.Ovcharenko INORG.CHEM.,2011,50,6597	catena-(bis(\m~2~-2-(1-n-Butylpyrazol-4-yl)-4,4,5,5-tetramethylimidazoline-1-oxyl-3-oxide-N,O)-tetrakis(1,1,1,5,5,5-hexafluoroacetylacetonato-O,O')-di-copper(ii) p-xylene solvate).	1:1	2	1	κ1	M1	2	none	pyrazol, acetylacetonato	increases connectivity	heterocyclic N-oxide and co-ligand	A*M1	A*B01)2*M1	A*B2*B01)2	0D	1D	1	none	1,2M3-1	2C1
UCEPUP03	G.V.Romanenko,K.Yu.Maryunina,A.S.Bogomyakov,R.Z.Sagdeev,V.I.Ovcharenko INORG.CHEM.,2011,50,6597	catena-(bis(\m~2~-2-(1-n-Butylpyrazol-4-yl)-4,4,5,5-tetramethylimidazoline-1-oxyl-3-oxide-N,O)-tetrakis(1,1,1,5,5,5-hexafluoroacetylacetonato-O,O')-di-copper(ii) p-xylene solvate).	1:1	2	1	κ1	M1	2	none	pyrazol, acetylacetonato	increases connectivity	heterocyclic N-oxide and co-ligand	A*M1	A*B01)2*M1	A*B2*B01)2	0D	1D	1	none	1,2M3-1	2C1
UCEPUP04	G.V.Romanenko,K.Yu.Maryunina,A.S.Bogomyakov,R.Z.Sagdeev,V.I.Ovcharenko INORG.CHEM.,2011,50,6597	catena-(bis(\m~2~-2-(1-n-Butylpyrazol-4-yl)-4,4,5,5-tetramethylimidazoline-1-oxyl-3-oxide-N,O)-tetrakis(1,1,1,5,5,5-hexafluoroacetylacetonato-O,O')-di-copper(ii) p-xylene solvate).	1:1	2	1	κ1	M1	2	none	pyrazol, acetylacetonato	increases connectivity	heterocyclic N-oxide and co-ligand	A*M1	A*B01)2*M1	A*B2*B01)2	0D	1D	1	none	1,2M3-1	2C1
UCEQAW	G.V.Romanenko,K.Yu.Maryunina,A.S.Bogomyakov,R.Z.Sagdeev,V.I.Ovcharenko INORG.CHEM.,2011,50,6597	catena-(bis(\m~2~-2-(1-n-Butylpyrazol-4-yl)-4,4,5,5-tetramethylimidazoline-1-oxyl-3-oxide-N,O)-tetrakis(1,1,1,5,5,5-hexafluoroacetylacetonato-O,O')-di-copper(ii) styrene solvate).	1:1	2	1	κ1	M1	2	none	pyrazol, acetylacetonato	increases connectivity	heterocyclic N-oxide and co-ligand	A*M1	A*B01)2*M1	A*B2*B01)2	0D	1D	1	none	1,2M3-1	2C1
UCEQAW01	G.V.Romanenko,K.Yu.Maryunina,A.S.Bogomyakov,R.Z.Sagdeev,V.I.Ovcharenko INORG.CHEM.,2011,50,6597	catena-(bis(\m~2~-2-(1-n-Butylpyrazol-4-yl)-4,4,5,5-tetramethylimidazoline-1-oxyl-3-oxide-N,O)-tetrakis(1,1,1,5,5,5-hexafluoroacetylacetonato-O,O')-di-copper(ii) styrene solvate).	1:1	2	1	κ1	M1	2	none	pyrazol, acetylacetonato	increases connectivity	heterocyclic N-oxide and co-ligand	A*M1	A*B01)2*M1	A*B2*B01)2	0D	1D	1	none	1,2M3-1	2C1
UCEQAW02	G.V.Romanenko,K.Yu.Maryunina,A.S.Bogomyakov,R.Z.Sagdeev,V.I.Ovcharenko INORG.CHEM.,2011,50,6597	catena-(bis(\m~2~-2-(1-n-Butylpyrazol-4-yl)-4,4,5,5-tetramethylimidazoline-1-oxyl-3-oxide-N,O)-tetrakis(1,1,1,5,5,5-hexafluoroacetylacetonato-O,O')-di-copper(ii) styrene solvate).	1:1	2	1	κ1	M1	2	none	pyrazol, acetylacetonato	increases connectivity	heterocyclic N-oxide and co-ligand	A*M1	A*B01)2*M1	A*B2*B01)2	0D	1D	1	none	1,2M3-1	2C1
UCEQAW03	G.V.Romanenko,K.Yu.Maryunina,A.S.Bogomyakov,R.Z.Sagdeev,V.I.Ovcharenko INORG.CHEM.,2011,50,6597	catena-(bis(\m~2~-2-(1-n-Butylpyrazol-4-yl)-4,4,5,5-tetramethylimidazoline-1-oxyl-3-oxide-N,O)-tetrakis(1,1,1,5,5,5-hexafluoroacetylacetonato-O,O')-di-copper(ii) styrene solvate).	1:1	2	1	κ1	M1	2	none	pyrazol, acetylacetonato	increases connectivity	heterocyclic N-oxide and co-ligand	A*M1	A*B01)2*M1	A*B2*B01)2	0D	1D	1	none	1,2M3-1	2C1
UCEQUQ	G.V.Romanenko,K.Yu.Maryunina,A.S.Bogomyakov,R.Z.Sagdeev,V.I.Ovcharenko INORG.CHEM.,2011,50,6597	catena-(bis(\m~2~-2-(1-n-Butylpyrazol-4-yl)-4,4,5,5-tetramethylimidazoline-1-oxyl-3-oxide-N,O)-tetrakis(1,1,1,5,5,5-hexafluoroacetylacetonato-O,O')-di-copper(ii) 4-methylstyrene solvate).	1:1	2	1	κ1	M1	2	none	pyrazol, acetylacetonato	increases connectivity	heterocyclic N-oxide and co-ligand	A*M1	A*B01)2*M1	A*B2*B01)2	0D	1D	1	none	1,2M3-1	2C1
UCEQUQ01	G.V.Romanenko,K.Yu.Maryunina,A.S.Bogomyakov,R.Z.Sagdeev,V.I.Ovcharenko INORG.CHEM.,2011,50,6597	catena-(bis(\m~2~-2-(1-n-Butylpyrazol-4-yl)-4,4,5,5-tetramethylimidazoline-1-oxyl-3-oxide-N,O)-tetrakis(1,1,1,5,5,5-hexafluoroacetylacetonato-O,O')-di-copper(ii) 4-methylstyrene solvate).	1:1	2	1	κ1	M1	2	none	pyrazol, acetylacetonato	increases connectivity	heterocyclic N-oxide and co-ligand	A*M1	A*B01)2*M1	A*B2*B01)2	0D	1D	1	none	1,2M3-1	2C1
UCEQUQ02	G.V.Romanenko,K.Yu.Maryunina,A.S.Bogomyakov,R.Z.Sagdeev,V.I.Ovcharenko INORG.CHEM.,2011,50,6597	catena-(bis(\m~2~-2-(1-n-Butylpyrazol-4-yl)-4,4,5,5-tetramethylimidazoline-1-oxyl-3-oxide-N,O)-tetrakis(1,1,1,5,5,5-hexafluoroacetylacetonato-O,O')-di-copper(ii) 4-methylstyrene solvate).	1:1	2	1	κ1	M1	2	none	pyrazol, acetylacetonato	increases connectivity	heterocyclic N-oxide and co-ligand	A*M1	A*B01)2*M1	A*B2*B01)2	0D	1D	1	none	1,2M3-1	2C1
UCEQUQ03	Romanenko G.V.,Maryunina K.YU.,Bogomyakov A.S.,Sagdeev R.Z.,Ovcharenko V.I. INORG.CHEM.,2011,50,6597	catena-(bis(\m~2~-2-(1-n-Butylpyrazol-4-yl)-4,4,5,5-tetramethylimidazoline-1-oxyl-3-oxide-N,O)-tetrakis(1,1,1,5,5,5-hexafluoroacetylacetonato-O,O')-di-copper(ii) 4-methylstyrene solvate).	1:1	2	1	κ1	M1	2	none	pyrazol, acetylacetonato	increases connectivity	heterocyclic N-oxide and co-ligand	A*M1	A*B01)2*M1	A*B2*B01)2	0D	1D	1	none	1,2M3-1	2C1
UCEROL	G.V.Romanenko,K.Yu.Maryunina,A.S.Bogomyakov,R.Z.Sagdeev,V.I.Ovcharenko INORG.CHEM.,2011,50,6597	catena-(bis(\m~2~-2-(1-n-Butylpyrazol-4-yl)-4,4,5,5-tetramethylimidazoline-1-oxyl-3-oxide-N,O)-tetrakis(1,1,1,5,5,5-hexafluoroacetylacetonato-O,O')-di-copper(ii) 1,4-diethylbenzene solvate).	1:1	2	1	κ1	M1	2	none	pyrazol, acetylacetonato	increases connectivity	heterocyclic N-oxide and co-ligand	A*M1	A*B01)2*M1	A*B2*B01)2	0D	1D	1	none	1,2M3-1	2C1
UCEROL01	G.V.Romanenko,K.Yu.Maryunina,A.S.Bogomyakov,R.Z.Sagdeev,V.I.Ovcharenko INORG.CHEM.,2011,50,6597	catena-(bis(\m~2~-2-(1-n-Butylpyrazol-4-yl)-4,4,5,5-tetramethylimidazoline-1-oxyl-3-oxide-N,O)-tetrakis(1,1,1,5,5,5-hexafluoroacetylacetonato-O,O')-di-copper(ii) 1,4-diethylbenzene solvate).	1:1	2	1	κ1	M1	2	none	pyrazol, acetylacetonato	increases connectivity	heterocyclic N-oxide and co-ligand	A*M1	A*B01)2*M1	A*B2*B01)2	0D	1D	1	none	1,2M3-1	2C1
UCEROL02	G.V.Romanenko,K.Yu.Maryunina,A.S.Bogomyakov,R.Z.Sagdeev,V.I.Ovcharenko INORG.CHEM.,2011,50,6597	catena-(bis(\m~2~-2-(1-n-Butylpyrazol-4-yl)-4,4,5,5-tetramethylimidazoline-1-oxyl-3-oxide-N,O)-tetrakis(1,1,1,5,5,5-hexafluoroacetylacetonato-O,O')-di-copper(ii) 1,4-diethylbenzene solvate).	1:1	2	1	κ1	M1	2	none	pyrazol, acetylacetonato	increases connectivity	heterocyclic N-oxide and co-ligand	A*M1	A*B01)2*M1	A*B2*B01)2	0D	1D	1	none	1,2M3-1	2C1
UCEROL03	G.V.Romanenko,K.Yu.Maryunina,A.S.Bogomyakov,R.Z.Sagdeev,V.I.Ovcharenko INORG.CHEM.,2011,50,6597	catena-(bis(\m~2~-2-(1-n-Butylpyrazol-4-yl)-4,4,5,5-tetramethylimidazoline-1-oxyl-3-oxide-N,O)-tetrakis(1,1,1,5,5,5-hexafluoroacetylacetonato-O,O')-di-copper(ii) 1,4-diethylbenzene solvate).	1:1	2	1	κ1	M1	2	none	pyrazol, acetylacetonato	increases connectivity	heterocyclic N-oxide and co-ligand	A*M1	A*B01)2*M1	A*B2*B01)2	0D	1D	1	none	1,2M3-1	2C1
UCEROL04	G.V.Romanenko,K.Yu.Maryunina,A.S.Bogomyakov,R.Z.Sagdeev,V.I.Ovcharenko INORG.CHEM.,2011,50,6597	catena-(bis(\m~2~-2-(1-n-Butylpyrazol-4-yl)-4,4,5,5-tetramethylimidazoline-1-oxyl-3-oxide-N,O)-tetrakis(1,1,1,5,5,5-hexafluoroacetylacetonato-O,O')-di-copper(ii) 1,4-diethylbenzene solvate).	1:1	2	1	κ1	M1	2	none	pyrazol, acetylacetonato	increases connectivity	heterocyclic N-oxide and co-ligand	A*M1	A*B01)2*M1	A*B2*B01)2	0D	1D	1	none	1,2M3-1	2C1
UCESUS	G.V.Romanenko,K.Yu.Maryunina,A.S.Bogomyakov,R.Z.Sagdeev,V.I.Ovcharenko INORG.CHEM.,2011,50,6597	catena-(bis(\m~2~-2-(1-n-Butylpyrazol-4-yl)-4,4,5,5-tetramethylimidazoline-1-oxyl-3-oxide-N,O)-tetrakis(1,1,1,5,5,5-hexafluoroacetylacetonato-O,O')-di-copper(ii) 1-methyl-4-ethylbenzene solvate).	1:1	2	1	κ1	M1	2	none	pyrazol, acetylacetonato	increases connectivity	heterocyclic N-oxide and co-ligand	A*M1	A*B01)2*M1	A*B2*B01)2	0D	1D	1	none	1,2M3-1	2C1
UCESUS01	G.V.Romanenko,K.Yu.Maryunina,A.S.Bogomyakov,R.Z.Sagdeev,V.I.Ovcharenko INORG.CHEM.,2011,50,6597	catena-(bis(\m~2~-2-(1-n-Butylpyrazol-4-yl)-4,4,5,5-tetramethylimidazoline-1-oxyl-3-oxide-N,O)-tetrakis(1,1,1,5,5,5-hexafluoroacetylacetonato-O,O')-di-copper(ii) 1-methyl-4-ethylbenzene solvate).	1:1	2	1	κ1	M1	2	none	pyrazol, acetylacetonato	increases connectivity	heterocyclic N-oxide and co-ligand	A*M1	A*B01)2*M1	A*B2*B01)2	0D	1D	1	none	1,2M3-1	2C1
UCESUS02	G.V.Romanenko,K.Yu.Maryunina,A.S.Bogomyakov,R.Z.Sagdeev,V.I.Ovcharenko INORG.CHEM.,2011,50,6597	catena-(bis(\m~2~-2-(1-n-Butylpyrazol-4-yl)-4,4,5,5-tetramethylimidazoline-1-oxyl-3-oxide-N,O)-tetrakis(1,1,1,5,5,5-hexafluoroacetylacetonato-O,O')-di-copper(ii) 1-methyl-4-ethylbenzene solvate).	1:1	2	1	κ1	M1	2	none	pyrazol, acetylacetonato	increases connectivity	heterocyclic N-oxide and co-ligand	A*M1	A*B01)2*M1	A*B2*B01)2	0D	1D	1	none	1,2M3-1	2C1
UCESUS03	G.V.Romanenko,K.Yu.Maryunina,A.S.Bogomyakov,R.Z.Sagdeev,V.I.Ovcharenko INORG.CHEM.,2011,50,6597	catena-(bis(\m~2~-2-(1-n-Butylpyrazol-4-yl)-4,4,5,5-tetramethylimidazoline-1-oxyl-3-oxide-N,O)-tetrakis(1,1,1,5,5,5-hexafluoroacetylacetonato-O,O')-di-copper(ii) 1-methyl-4-ethylbenzene solvate).	1:1	2	1	κ1	M1	2	none	pyrazol, acetylacetonato	increases connectivity	heterocyclic N-oxide and co-ligand	A*M1	A*B01)2*M1	A*B2*B01)2	0D	1D	1	none	1,2M3-1	2C1
UCETIH	G.V.Romanenko,K.Yu.Maryunina,A.S.Bogomyakov,R.Z.Sagdeev,V.I.Ovcharenko INORG.CHEM.,2011,50,6597	catena-(bis(\m~2~-2-(1-n-Butylpyrazol-4-yl)-4,4,5,5-tetramethylimidazoline-1-oxyl-3-oxide-N,O)-tetrakis(1,1,1,5,5,5-hexafluoroacetylacetonato-O,O')-di-copper(ii) 1,4-bis(trifluoromethyl)benzene solvate).	1:1	2	1	κ1	M1	2	none	pyrazol, acetylacetonato	increases connectivity	heterocyclic N-oxide and co-ligand	A*M1	A*B01)2*M1	A*B2*B01)2	0D	1D	1	none	1,2M3-1	2C1
UCETIH01	G.V.Romanenko,K.Yu.Maryunina,A.S.Bogomyakov,R.Z.Sagdeev,V.I.Ovcharenko INORG.CHEM.,2011,50,6597	catena-(bis(\m~2~-2-(1-n-Butylpyrazol-4-yl)-4,4,5,5-tetramethylimidazoline-1-oxyl-3-oxide-N,O)-tetrakis(1,1,1,5,5,5-hexafluoroacetylacetonato-O,O')-di-copper(ii) 1,4-bis(trifluoromethyl)benzene solvate).	1:1	2	1	κ1	M1	2	none	pyrazol, acetylacetonato	increases connectivity	heterocyclic N-oxide and co-ligand	A*M1	A*B01)2*M1	A*B2*B01)2	0D	1D	1	none	1,2M3-1	2C1
UCETIH02	G.V.Romanenko,K.Yu.Maryunina,A.S.Bogomyakov,R.Z.Sagdeev,V.I.Ovcharenko INORG.CHEM.,2011,50,6597	catena-(bis(\m~2~-2-(1-n-Butylpyrazol-4-yl)-4,4,5,5-tetramethylimidazoline-1-oxyl-3-oxide-N,O)-tetrakis(1,1,1,5,5,5-hexafluoroacetylacetonato-O,O')-di-copper(ii) 1,4-bis(trifluoromethyl)benzene solvate).	1:1	2	1	κ1	M1	2	none	pyrazol, acetylacetonato	increases connectivity	heterocyclic N-oxide and co-ligand	A*M1	A*B01)2*M1	A*B2*B01)2	0D	1D	1	none	1,2M3-1	2C1
UCETIH03	G.V.Romanenko,K.Yu.Maryunina,A.S.Bogomyakov,R.Z.Sagdeev,V.I.Ovcharenko INORG.CHEM.,2011,50,6597	catena-(bis(\m~2~-2-(1-n-Butylpyrazol-4-yl)-4,4,5,5-tetramethylimidazoline-1-oxyl-3-oxide-N,O)-tetrakis(1,1,1,5,5,5-hexafluoroacetylacetonato-O,O')-di-copper(ii) 1,4-bis(trifluoromethyl)benzene solvate).	1:1	2	1	κ1	M1	2	none	pyrazol, acetylacetonato	increases connectivity	heterocyclic N-oxide and co-ligand	A*M1	A*B01)2*M1	A*B2*B01)2	0D	1D	1	none	1,2M3-1	2C1
UCETIH04	G.V.Romanenko,K.Yu.Maryunina,A.S.Bogomyakov,R.Z.Sagdeev,V.I.Ovcharenko INORG.CHEM.,2011,50,6597	catena-(bis(\m~2~-2-(1-n-Butylpyrazol-4-yl)-4,4,5,5-tetramethylimidazoline-1-oxyl-3-oxide-N,O)-tetrakis(1,1,1,5,5,5-hexafluoroacetylacetonato-O,O')-di-copper(ii) 1,4-bis(trifluoromethyl)benzene solvate).	1:1	2	1	κ1	M1	2	none	pyrazol, acetylacetonato	increases connectivity	heterocyclic N-oxide and co-ligand	A*M1	A*B01)2*M1	A*B2*B01)2	0D	1D	1	none	1,2M3-1	2C1
UCEVIJ	G.V.Romanenko,K.Yu.Maryunina,A.S.Bogomyakov,R.Z.Sagdeev,V.I.Ovcharenko INORG.CHEM.,2011,50,6597	catena-(bis(\m~2~-2-(1-n-Butylpyrazol-4-yl)-4,4,5,5-tetramethylimidazoline-1-oxyl-3-oxide-N,O)-tetrakis(1,1,1,5,5,5-hexafluoroacetylacetonato-O,O')-di-copper(ii) 1,2,3-trimethylbenzene solvate).	1:1	2	1	κ1	M1	2	none	pyrazol, acetylacetonato	increases connectivity	heterocyclic N-oxide and co-ligand	A*M1	A*B01)2*M1	A*B2*B01)2	0D	1D	1	none	1,2M3-1	2C1
UCEVIJ01	G.V.Romanenko,K.Yu.Maryunina,A.S.Bogomyakov,R.Z.Sagdeev,V.I.Ovcharenko INORG.CHEM.,2011,50,6597	catena-(bis(\m~2~-2-(1-n-Butylpyrazol-4-yl)-4,4,5,5-tetramethylimidazoline-1-oxyl-3-oxide-N,O)-tetrakis(1,1,1,5,5,5-hexafluoroacetylacetonato-O,O')-di-copper(ii) 1,2,3-trimethylbenzene solvate).	1:1	2	1	κ1	M1	2	none	pyrazol, acetylacetonato	increases connectivity	heterocyclic N-oxide and co-ligand	A*M1	A*B01)2*M1	A*B2*B01)2	0D	1D	1	none	1,2M3-1	2C1
UCEVIJ02	G.V.Romanenko,K.Yu.Maryunina,A.S.Bogomyakov,R.Z.Sagdeev,V.I.Ovcharenko INORG.CHEM.,2011,50,6597	catena-(bis(\m~2~-2-(1-n-Butylpyrazol-4-yl)-4,4,5,5-tetramethylimidazoline-1-oxyl-3-oxide-N,O)-tetrakis(1,1,1,5,5,5-hexafluoroacetylacetonato-O,O')-di-copper(ii) 1,2,3-trimethylbenzene solvate).	1:1	2	1	κ1	M1	2	none	pyrazol, acetylacetonato	increases connectivity	heterocyclic N-oxide and co-ligand	A*M1	A*B01)2*M1	A*B2*B01)2	0D	1D	1	none	1,2M3-1	2C1
UCEVIJ03	G.V.Romanenko,K.Yu.Maryunina,A.S.Bogomyakov,R.Z.Sagdeev,V.I.Ovcharenko INORG.CHEM.,2011,50,6597	catena-(bis(\m~2~-2-(1-n-Butylpyrazol-4-yl)-4,4,5,5-tetramethylimidazoline-1-oxyl-3-oxide-N,O)-tetrakis(1,1,1,5,5,5-hexafluoroacetylacetonato-O,O')-di-copper(ii) 1,2,3-trimethylbenzene solvate).	1:1	2	1	κ1	M1	2	none	pyrazol, acetylacetonato	increases connectivity	heterocyclic N-oxide and co-ligand	A*M1	A*B01)2*M1	A*B2*B01)2	0D	1D	1	none	1,2M3-1	2C1
UCEVIJ04	G.V.Romanenko,K.Yu.Maryunina,A.S.Bogomyakov,R.Z.Sagdeev,V.I.Ovcharenko INORG.CHEM.,2011,50,6597	catena-(bis(\m~2~-2-(1-n-Butylpyrazol-4-yl)-4,4,5,5-tetramethylimidazoline-1-oxyl-3-oxide-N,O)-tetrakis(1,1,1,5,5,5-hexafluoroacetylacetonato-O,O')-di-copper(ii) 1,2,3-trimethylbenzene solvate).	1:1	2	1	κ1	M1	2	none	pyrazol, acetylacetonato	increases connectivity	heterocyclic N-oxide and co-ligand	A*M1	A*B01)2*M1	A*B2*B01)2	0D	1D	1	none	1,2M3-1	2C1
UCEXAD	G.V.Romanenko,K.Yu.Maryunina,A.S.Bogomyakov,R.Z.Sagdeev,V.I.Ovcharenko INORG.CHEM.,2011,50,6597	catena-(bis(\m~2~-2-(1-n-Butylpyrazol-4-yl)-4,4,5,5-tetramethylimidazoline-1-oxyl-3-oxide-N,O)-tetrakis(1,1,1,5,5,5-hexafluoroacetylacetonato-O,O')-di-copper(ii) 1,2,4-trimethylbenzene solvate).	1:1	2	1	κ1	M1	2	none	pyrazol, acetylacetonato	increases connectivity	heterocyclic N-oxide and co-ligand	A*M1	A*B01)2*M1	A*B2*B01)2	0D	1D	1	none	1,2M3-1	2C1
UCEXAD01	G.V.Romanenko,K.Yu.Maryunina,A.S.Bogomyakov,R.Z.Sagdeev,V.I.Ovcharenko INORG.CHEM.,2011,50,6597	catena-(bis(\m~2~-2-(1-n-Butylpyrazol-4-yl)-4,4,5,5-tetramethylimidazoline-1-oxyl-3-oxide-N,O)-tetrakis(1,1,1,5,5,5-hexafluoroacetylacetonato-O,O')-di-copper(ii) 1,2,4-trimethylbenzene solvate).	1:1	2	1	κ1	M1	2	none	pyrazol, acetylacetonato	increases connectivity	heterocyclic N-oxide and co-ligand	A*M1	A*B01)2*M1	A*B2*B01)2	0D	1D	1	none	1,2M3-1	2C1
UCEXAD02	G.V.Romanenko,K.Yu.Maryunina,A.S.Bogomyakov,R.Z.Sagdeev,V.I.Ovcharenko INORG.CHEM.,2011,50,6597	catena-(bis(\m~2~-2-(1-n-Butylpyrazol-4-yl)-4,4,5,5-tetramethylimidazoline-1-oxyl-3-oxide-N,O)-tetrakis(1,1,1,5,5,5-hexafluoroacetylacetonato-O,O')-di-copper(ii) 1,2,4-trimethylbenzene solvate).	1:1	2	1	κ1	M1	2	none	pyrazol, acetylacetonato	increases connectivity	heterocyclic N-oxide and co-ligand	A*M1	A*B01)2*M1	A*B2*B01)2	0D	1D	1	none	1,2M3-1	2C1
UCEXAD03	G.V.Romanenko,K.Yu.Maryunina,A.S.Bogomyakov,R.Z.Sagdeev,V.I.Ovcharenko INORG.CHEM.,2011,50,6597	catena-(bis(\m~2~-2-(1-n-Butylpyrazol-4-yl)-4,4,5,5-tetramethylimidazoline-1-oxyl-3-oxide-N,O)-tetrakis(1,1,1,5,5,5-hexafluoroacetylacetonato-O,O')-di-copper(ii) 1,2,4-trimethylbenzene solvate).	1:1	2	1	κ1	M1	2	none	pyrazol, acetylacetonato	increases connectivity	heterocyclic N-oxide and co-ligand	A*M1	A*B01)2*M1	A*B2*B01)2	0D	1D	1	none	1,2M3-1	2C1
UHOKUX	T.Ise,T.Ishida,T.Nogami BULL.CHEM.SOC.JPN.,2002,75,2463	(\m~2~-4,4,5,5-tetramethylimidazolin-1-oxyl3-oxide)-bis(aqua-bis(hexafluoroacetylacetonato)-copper(ii)).	2:1	2	2	κ1	B2	1	none	acetylacetonato, water	increases connectivity	co-ligand	A)2*B2	A*B01)2*M1	A)2*B2*B01)4*M1)2	0D	0D	1	2	1,2M3-1	1,2,4M9-2
UHOQAK	E.Tretyakov,S.Tolstikov,A.Mareev,A.Medvedeva,G.Romanenko,D.Stass,A.Bogomyakov,V.Ovcharenko EUR.J.ORG.CHEM.,2009,2009,2548	catena-(bis(\m~3~-4,4,5,5-Tetramethyl-2-(2-methoxyvinyl)-4,5-dihydro-1H-imidazole-3-oxide.	3:2	2	2	κ2, κ1	B3	2	2-c N2O2Cu2, 2-c N2O2Cu	acetylacetonato	terminal	co-ligand	A)3*B3)2	A*B01)2	A)3*B3)2*B01)6	1D	1D	none	none	2,2,3C6	2,2,3C6
UJEVUB	Xiao-dan Chen,Rong Rong,Yun Wang,Li-li Zhu,Qi-hua Zhao,Siau Gek Ang,Bai-wang Sun EUR.J.INORG.CHEM.,2010,3506	catena-(tetrakis(\m~2~-2,2-dimethylpropanoato)-(\m~2~-4,4,5,5-tetramethyl-2-(pyridin-4-yl)imidazoline-1-oxyl 3-oxide)-di-copper(ii)).	2:1	2	1	κ1	M1	1	none	pyridin, carboxylate	increases connectivity	heterocyclic N-oxide and co-ligand	A)2*M1	A)2*B2)4*M1	A)2*B2)5	0D	1D	1	none	1M2-1	2,2,5C3
UMIWIZ	Y.Navarro,G.P.Guedes,M.A.del Aguila-Sanchez,M.J.Iglesias,F.Lloret,F.Lopez-Ortiz DALTON TRANS.,2021,50,2585	catena-[(\m-[4-(2-{[(3,3-dimethylbutan-2-yl)amino](phenyl)phosphoryl}anilino)-2,2,6,6-tetramethylpiperidin-1-yl]oxidanylradical)-bis(1,1,1,5,5,5-hexafluoroacetylacetonato)-copper(ii) toluenesolvate].	1:1	1	1	κ1	M1	1	none	acetylacetonato, phosphoryl	increases connectivity	heterocyclic N-oxide and co-ligand	A*M1	A*B01)2*M1	A*B2*B01)2	0D	1D	1	none	1M2-1	2C1
UNAFEW	R.A.A.Cassaro,J.R.Friedman,P.M.Lahti POLYHEDRON,2016,117,7	(2-(1'-Pyrenyl)-4,4,5,5-tetramethyl-4,5-dihydro-1H-imidazole-3-oxide-1-oxyl)-bis(1,1,1,5,5,5-hexafluoro-4-oxopent-2-en-2-olato)-copper(ii).	1:1	2	1	κ1	M1	1	none	acetylacetonato	terminal	co-ligand	A*M1	A*B01)2	A*B01)2*M1	0D	0D	1	1	1M2-1	1,3M4-1
UNEROX	P.A.Goddard,John Singleton,I.Franke,J.S.Moller,T.Lancaster,A.J.Steele,C.V.Topping,S.J.Blundell,F.L.Pratt,C.Baines,J.Bendix,R.D.McDonald,J.Brambleby,M.R.Lees,S.H.Lapidus,P.W.Stephens,B.W.Twamley,M.M.Conner,K.Funk,J.F.Corbey,H.E.Tran,J.A.Schlueter PHYS.REV.B,2016,93,94430	catena-[bis(\m-pyrazine)-bis(4-phenylpyridine N-oxide)-copper(ii)diperchlorate].	1:2	1	1	κ1	M1	2	none	pyrazine	increases connectivity	co-ligand	A*M1)2	A*B2)2	A*B2)2*M1)2	0D	2D	1	none	1,2M3-1	sql
UNEROX01	P.A.Goddard,John Singleton,I.Franke,J.S.Moller,T.Lancaster,A.J.Steele,C.V.Topping,S.J.Blundell,F.L.Pratt,C.Baines,J.Bendix,R.D.McDonald,J.Brambleby,M.R.Lees,S.H.Lapidus,P.W.Stephens,B.W.Twamley,M.M.Conner,K.Funk,J.F.Corbey,H.E.Tran,J.A.Schlueter PHYS.REV.B,2016,93,94430	catena-[bis(\m-pyrazine)-bis(4-phenylpyridine N-oxide)-copper(ii)diperchlorate].	1:2	1	1	κ1	M1	2	none	pyrazine	increases connectivity	co-ligand	A*M1)2	A*B2)2	A*B2)2*M1)2	0D	2D	1	none	1,2M3-1	sql
UXOWAG	P.A.Goddard,J.Singleton,P.Sengupta,R.D.McDonald,T.Lancaster,S.J.Blundell,F.L.Pratt,S.Cox,N.Harrison,J.L.Manson,H.I.Southerland,J.A.Schlueter New Journal of Physics,2008,10,83025	catena-(tetrakis(\m~2~-Pyrazine)-tetrakis(pyridine-N-oxide)-di-coppertetraperchlorate).	1:2	1	1	κ1	M1	2	none	pyrazine	increases connectivity	co-ligand	A*M1)2	A*B2)2	A*B2)2*M1)2	0D	2D	1	none	1,2M3-1	sql
UXOWAG01	P.A.Goddard,John Singleton,I.Franke,J.S.Moller,T.Lancaster,A.J.Steele,C.V.Topping,S.J.Blundell,F.L.Pratt,C.Baines,J.Bendix,R.D.McDonald,J.Brambleby,M.R.Lees,S.H.Lapidus,P.W.Stephens,B.W.Twamley,M.M.Conner,K.Funk,J.F.Corbey,H.E.Tran,J.A.Schlueter PHYS.REV.B,2016,93,94430	catena-[tetrakis(\m-pyrazine)-tetrakis(pyridine N-oxide)-di-copper(ii)tetraperchlorate].	1:2	1	1	κ1	M1	2	none	pyrazine	increases connectivity	co-ligand	A*M1)2	A*B2)2	A*B2)2*M1)2	0D	2D	1	none	1,2M3-1	sql
UXOWAG02	P.A.Goddard,John Singleton,I.Franke,J.S.Moller,T.Lancaster,A.J.Steele,C.V.Topping,S.J.Blundell,F.L.Pratt,C.Baines,J.Bendix,R.D.McDonald,J.Brambleby,M.R.Lees,S.H.Lapidus,P.W.Stephens,B.W.Twamley,M.M.Conner,K.Funk,J.F.Corbey,H.E.Tran,J.A.Schlueter PHYS.REV.B,2016,93,94430	catena-[tetrakis(\m-pyrazine)-tetrakis(pyridine N-oxide)-di-copper(ii)tetraperchlorate].	1:2	1	1	κ1	M1	2	none	pyrazine	increases connectivity	co-ligand	A*M1)2	A*B2)2	A*B2)2*M1)2	0D	2D	1	none	1,2M3-1	sql
VEPZEV	P.T.Matsunaga,D.T.McCall,M.D.Carducci,R.J.Doedens INORG.CHEM.,1990,29,1655	catena-(bis(Hexafluoroacetylacetonato)-(\m~2~-bis(1-oxy-2,5,5-trimethyl-2-pyrrolidinyl)methane-O,O')-copper(ii)).	1:1	2	2	κ1	B2	2	none	acetylacetonato	terminal	co-ligand	A*B2	A*B01)2	A*B2*B01)2	1D	1D	none	none	2C1	2C1
VEPZUN	S.V.Fokin,V.I.Ovcharenko,G.V.Romanenko,E.V.Tret'yakov,A.S.Bogomyakov,L.V.Saloutina,T.I.Filyakova,V.I.Saloutin,V.N.Carushin,O.N.Chupakhin IZV.AKAD.NAUK SSSR,SER.KHIM.(RUSS.)(RUSS.CHEM.BULL.),2011,798	bis(1,1,1,3,5,5,5-Heptafluoro-4-iminopent-2-ene-2-aminato)-bis(4,4,5,5-tetramethyl-1-oxyl-4,5-dihydro-1H-imidazole-3-oxide-O)-copper(ii).	1:2	2	1	κ1	M1	2	none	4-iminopent-2-ene-2-aminato	terminal	co-ligand	A*M1)2	A*B01)2	A*B01)2*M1)2	0D	0D	1	1	1,2M3-1	1,4M5-1
VEPZUN01	S.V.Fokin,V.I.Ovcharenko,G.V.Romanenko,E.V.Tret'yakov,A.S.Bogomyakov,L.V.Saloutina,T.I.Filyakova,V.I.Saloutin,V.N.Carushin,O.N.Chupakhin IZV.AKAD.NAUK SSSR,SER.KHIM.(RUSS.)(RUSS.CHEM.BULL.),2011,798	bis(1,1,1,3,5,5,5-Heptafluoro-4-iminopent-2-ene-2-aminato)-bis(4,4,5,5-tetramethyl-1-oxyl-4,5-dihydro-1H-imidazole-3-oxide-O)-copper(ii).	1:2	2	1	κ1	M1	2	none	4-iminopent-2-ene-2-aminato	terminal	co-ligand	A*M1)2	A*B01)2	A*B01)2*M1)2	0D	0D	1	1	1,2M3-1	1,4M5-1
VEPZUN02	S.V.Fokin,V.I.Ovcharenko,G.V.Romanenko,E.V.Tret'yakov,A.S.Bogomyakov,L.V.Saloutina,T.I.Filyakova,V.I.Saloutin,V.N.Carushin,O.N.Chupakhin IZV.AKAD.NAUK SSSR,SER.KHIM.(RUSS.)(RUSS.CHEM.BULL.),2011,798	bis(1,1,1,3,5,5,5-Heptafluoro-4-iminopent-2-ene-2-aminato)-bis(4,4,5,5-tetramethyl-1-oxyl-4,5-dihydro-1H-imidazole-3-oxide-O)-copper(ii).	1:2	2	1	κ1	M1	2	none	4-iminopent-2-ene-2-aminato	terminal	co-ligand	A*M1)2	A*B01)2	A*B01)2*M1)2	0D	0D	1	1	1,2M3-1	1,4M5-1
VERQIT	Shi-Guo Zhang,Wei-Nan Li,Jing-Min Shi ACTA CRYSTALLOGR.,SECT.E:STRUCT.REP.ONLINE,2006,62,m3181	bis(\m~2~-4-Methoxypyridine N-oxide-O,O)-bis(dibromo-copper(ii)).	1:1	1	1	κ2	M2	2	2-c N2O2Cu2	bromo	terminal	co-ligand	A*M2	A*M1)2	A*M2*M1)2	0D	0D	2	2	2M4-1	1,2,4M8-3
VEVBOO	H.Kinoshita,H.Akutsu,J.Yamada,S.Nakatsuji MENDELEEV COMMUN.,2006,305	(\m~2~-4-Amino-2,2,6,6-tetramethylpiperidyloxy)-tetrakis(hexafluoroacetylacetonato)-di-copper(ii).	2:1	1	1	κ1	M1	1	none	amine, acetylacetonato	increases connectivity	heterocyclic N-oxide and co-ligand	A)2*M1	A)2*B01)4*M1	A)2*B2*B01)4	0D	0D	1	2	1M2-1	1,2,3M7-2
VIXWOP	S.L.Veber,M.V.Fedin,A.I.Potapov,K.Yu.Maryunina,G.V.Romanenko,R.Z.Sagdeev,V.I.Ovcharenko,D.Goldfarb,E.G.Bagryanskaya J.AM.CHEM.SOC.,2008,130,2444	catena-(bis(\m~2~-2-(1-n-Butyl-1H-pyrazol-4-yl)-3-oxy-4,4,5,5-tetramethyl-1-oxo-4,5-dihydro-1H-imidazole-N',O)-tetrakis(hexafluoroacetylacetonato-O,O')-di-copper(ii) n-octane solvate).	1:1	2	1	κ1	M1	2	none	pyrazol, acetylacetonato	increases connectivity	heterocyclic N-oxide and co-ligand	A*M1	A*B01)2*M1	A*B2*B01)2	0D	1D	1	none	1,2M3-1	2C1
VIXWOP01	S.L.Veber,M.V.Fedin,A.I.Potapov,K.Yu.Maryunina,G.V.Romanenko,R.Z.Sagdeev,V.I.Ovcharenko,D.Goldfarb,E.G.Bagryanskaya J.AM.CHEM.SOC.,2008,130,2444	catena-(bis(\m~2~-2-(1-n-Butyl-1H-pyrazol-4-yl)-3-oxy-4,4,5,5-tetramethyl-1-oxo-4,5-dihydro-1H-imidazole-N',O)-tetrakis(hexafluoroacetylacetonato-O,O')-di-copper(ii) n-octane solvate).	1:1	2	1	κ1	M1	2	none	pyrazol, acetylacetonato	increases connectivity	heterocyclic N-oxide and co-ligand	A*M1	A*B01)2*M1	A*B2*B01)2	0D	1D	1	none	1,2M3-1	2C1
VIXWOP02	S.L.Veber,M.V.Fedin,A.I.Potapov,K.Yu.Maryunina,G.V.Romanenko,R.Z.Sagdeev,V.I.Ovcharenko,D.Goldfarb,E.G.Bagryanskaya J.AM.CHEM.SOC.,2008,130,2444	catena-(bis(\m~2~-2-(1-n-Butyl-1H-pyrazol-4-yl)-3-oxy-4,4,5,5-tetramethyl-1-oxo-4,5-dihydro-1H-imidazole-N',O)-tetrakis(hexafluoroacetylacetonato-O,O')-di-copper(ii) n-octane solvate).	1:1	2	1	κ1	M1	2	none	pyrazol, acetylacetonato	increases connectivity	heterocyclic N-oxide and co-ligand	A*M1	A*B01)2*M1	A*B2*B01)2	0D	1D	1	none	1,2M3-1	2C1
VIXWOP03	S.L.Veber,M.V.Fedin,A.I.Potapov,K.Yu.Maryunina,G.V.Romanenko,R.Z.Sagdeev,V.I.Ovcharenko,D.Goldfarb,E.G.Bagryanskaya J.AM.CHEM.SOC.,2008,130,2444	catena-(bis(\m~2~-2-(1-n-Butyl-1H-pyrazol-4-yl)-3-oxy-4,4,5,5-tetramethyl-1-oxo-4,5-dihydro-1H-imidazole-N',O)-tetrakis(hexafluoroacetylacetonato-O,O')-di-copper(ii) n-octane solvate).	1:1	2	1	κ1	M1	2	none	pyrazol, acetylacetonato	increases connectivity	heterocyclic N-oxide and co-ligand	A*M1	A*B01)2*M1	A*B2*B01)2	0D	1D	1	none	1,2M3-1	2C1
VIXWOP04	S.L.Veber,M.V.Fedin,A.I.Potapov,K.Yu.Maryunina,G.V.Romanenko,R.Z.Sagdeev,V.I.Ovcharenko,D.Goldfarb,E.G.Bagryanskaya J.AM.CHEM.SOC.,2008,130,2444	catena-(bis(\m~2~-2-(1-n-Butyl-1H-pyrazol-4-yl)-3-oxy-4,4,5,5-tetramethyl-1-oxo-4,5-dihydro-1H-imidazole-N',O)-tetrakis(hexafluoroacetylacetonato-O,O')-di-copper(ii) n-octane solvate).	1:1	2	1	κ1	M1	2	none	pyrazol, acetylacetonato	increases connectivity	heterocyclic N-oxide and co-ligand	A*M1	A*B01)2*M1	A*B2*B01)2	0D	1D	1	none	1,2M3-1	2C1
VIXWOP05	V.I.Ovcharenko,G.V.Romanenko,K.Yu.Maryunina,A.S.Bogomyakov,E.V.Gorelik INORG.CHEM.,2008,47,9537	catena-(bis(\m~2~-4,4,5,5-Tetramethyl-2-(1-butylpyrazole-4-yl)-4,5-dihydro-1H-imidazol-3-oxide-1-oxyl)-tetrakis(1,1,1,5,5,5-hexafluoropentan-2,4-dionato)-di-copper(ii) octane solvate).	1:1	2	1	κ1	M1	2	none	pyrazol, acetylacetonato	increases connectivity	heterocyclic N-oxide and co-ligand	A*M1	A*B01)2*M1	A*B2*B01)2	0D	1D	1	none	1,2M3-1	2C1
VIXWOP06	V.I.Ovcharenko,G.V.Romanenko,K.Yu.Maryunina,A.S.Bogomyakov,E.V.Gorelik INORG.CHEM.,2008,47,9537	catena-(bis(\m~2~-4,4,5,5-Tetramethyl-2-(1-butylpyrazole-4-yl)-4,5-dihydro-1H-imidazol-3-oxide-1-oxyl)-tetrakis(1,1,1,5,5,5-hexafluoropentan-2,4-dionato)-di-copper(ii) octane solvate).	1:1	2	1	κ1	M1	2	none	pyrazol, acetylacetonato	increases connectivity	heterocyclic N-oxide and co-ligand	A*M1	A*B01)2*M1	A*B2*B01)2	0D	1D	1	none	1,2M3-1	2C1
VIXWOP07	V.I.Ovcharenko,G.V.Romanenko,K.Yu.Maryunina,A.S.Bogomyakov,E.V.Gorelik INORG.CHEM.,2008,47,9537	catena-(bis(\m~2~-4,4,5,5-Tetramethyl-2-(1-butylpyrazole-4-yl)-4,5-dihydro-1H-imidazol-3-oxide-1-oxyl)-tetrakis(1,1,1,5,5,5-hexafluoropentan-2,4-dionato)-di-copper(ii) octane solvate).	1:1	2	1	κ1	M1	2	none	pyrazol, acetylacetonato	increases connectivity	heterocyclic N-oxide and co-ligand	A*M1	A*B01)2*M1	A*B2*B01)2	0D	1D	1	none	1,2M3-1	2C1
VIXWOP08	V.I.Ovcharenko,G.V.Romanenko,K.Yu.Maryunina,A.S.Bogomyakov,E.V.Gorelik INORG.CHEM.,2008,47,9537	catena-(bis(\m~2~-4,4,5,5-Tetramethyl-2-(1-butylpyrazole-4-yl)-4,5-dihydro-1H-imidazol-3-oxide-1-oxyl)-tetrakis(1,1,1,5,5,5-hexafluoropentan-2,4-dionato)-di-copper(ii) octane solvate).	1:1	2	1	κ1	M1	2	none	pyrazol, acetylacetonato	increases connectivity	heterocyclic N-oxide and co-ligand	A*M1	A*B01)2*M1	A*B2*B01)2	0D	1D	1	none	1,2M3-1	2C1
VIXWOP09	V.I.Ovcharenko,G.V.Romanenko,K.Yu.Maryunina,A.S.Bogomyakov,E.V.Gorelik INORG.CHEM.,2008,47,9537	catena-(bis(\m~2~-4,4,5,5-Tetramethyl-2-(1-butylpyrazole-4-yl)-4,5-dihydro-1H-imidazol-3-oxide-1-oxyl)-tetrakis(1,1,1,5,5,5-hexafluoropentan-2,4-dionato)-di-copper(ii) octane solvate).	1:1	2	1	κ1	M1	2	none	pyrazol, acetylacetonato	increases connectivity	heterocyclic N-oxide and co-ligand	A*M1	A*B01)2*M1	A*B2*B01)2	0D	1D	1	none	1,2M3-1	2C1
VIXWOP10	V.I.Ovcharenko,G.V.Romanenko,K.Yu.Maryunina,A.S.Bogomyakov,E.V.Gorelik INORG.CHEM.,2008,47,9537	catena-(bis(\m~2~-4,4,5,5-Tetramethyl-2-(1-butylpyrazole-4-yl)-4,5-dihydro-1H-imidazol-3-oxide-1-oxyl)-tetrakis(1,1,1,5,5,5-hexafluoropentan-2,4-dionato)-di-copper(ii) octane solvate).	1:1	2	1	κ1	M1	2	none	pyrazol, acetylacetonato	increases connectivity	heterocyclic N-oxide and co-ligand	A*M1	A*B01)2*M1	A*B2*B01)2	0D	1D	1	none	1,2M3-1	2C1
VIXWOP11	V.I.Ovcharenko,G.V.Romanenko,K.Yu.Maryunina,A.S.Bogomyakov,E.V.Gorelik INORG.CHEM.,2008,47,9537	catena-(bis(\m~2~-4,4,5,5-Tetramethyl-2-(1-butylpyrazole-4-yl)-4,5-dihydro-1H-imidazol-3-oxide-1-oxyl)-tetrakis(1,1,1,5,5,5-hexafluoropentan-2,4-dionato)-di-copper(ii) octane solvate).	1:1	2	1	κ1	M1	2	none	pyrazol, acetylacetonato	increases connectivity	heterocyclic N-oxide and co-ligand	A*M1	A*B01)2*M1	A*B2*B01)2	0D	1D	1	none	1,2M3-1	2C1
VOQGIS	R.W.Seidel,I.M.Oppel ACTA CRYSTALLOGR.,SECT.E:STRUCT.REP.ONLINE,2009,65,m460	bis(\m~2~-chlorido)-bis(aqua-chlorido-[2,2'-thiobis(pyridineN-oxide)-\kO]-copper(ii)).	1:1	2	1	κ1	M1	1	none	water, chloro	increases connectivity	co-ligand	A*M1	A*M2*M1)2	A*M2*M1)3	0D	0D	1	2	1M2-1	1,2,5M10-1
WABVOM	J.A.Fernandes,A.I.Ramos,S.S.Braga,F.A.A.Paz ACTA CRYSTALLOGR.,SECT.E:STRUCT.REP.ONLINE,2010,66,m1689	bis[1,1,1,5,5,5-Hexafluoropentane-2,4-dionato]-bis(4-phenylpyridineN-oxide)-copper(ii).	1:2	1	1	κ1	M1	2	none	acetylacetonato	terminal	co-ligand	A*M1)2	A*B01)2	A*B01)2*M1)2	0D	0D	1	1	1,2M3-1	1,4M5-1
WEHPEF	D.G.Mantero,A.Neels,H.Stoeckli-Evans INORG.CHEM.,2006,45,3287	catena-(bis(\m~2~-4,4'-bipyridine-N,N'-dioxide-O,O')-aqua-copper(ii)dithionate monohydrate).	1:2	2	2	κ1	B2	4	none	water	terminal	co-ligand	A*B2)2	A*M1	A*B2)2*M1	2D	2D	none	none	2,4L2(sql)	sql
WIKKIL	Pei-Xiu Yin,Jian Zhang,Zhao-Ji Li,Jian-Kai Cheng,Ye-Yan Qin,Lei Zhang,Yuan-Gen Yao INORG.CHIM.ACTA,2007,360,3525	catena-(bis((\m~4~-2,2'-Biphenyldicarboxylato)-(\m~3~-2,2'-biphenyldicarboxylato)-(\m~2~-4,4'-dipyridine-N,N'-dioxide))-tetra-aqua-tetra-copper(ii)).	4:1	2	2	κ1	B2	1	none	water, carboxylate	increases connectivity	co-ligand	A)4*B2	A)2*K4*T3*M1)2	A)4*K4)2*T3)2*B2*M1)4	0D	2D	1	none	1,2M3-1	3,4,4,4L22
WIPJOU	Lei Zhang,Su-Qi Li,Bai-Wang Sun,Dai-Zheng Liao,Zong-Hui Jiang,Shi-Ping Yan,Geng-Lin Wang,Xin-Kan Yao,Hong-Gen Wang POLYHEDRON,1999,18,781	tetrakis(\m~2~-Pentafluoropropionato)-bis(2-(3-nitrophenyl)-4,4,5,5-tetramethylimidazoline-1-oxyl-3-oxide)-di-copper(ii). tetrakis(mu!2$-Pentafluoropropionato)-bis(2-(3-nitrophenyl)nitronylnitroxide)-di-copper(ii).	1:1	2	1	κ1	M1	1	none	carboxylate	increases connectivity	co-ligand	A*M1	A*B2)2	A*B2)2*M1	0D	0D	1	2	1M2-1	1,2,5M8-2
WIPJUA	Lei Zhang,Su-Qi Li,Bai-Wang Sun,Dai-Zheng Liao,Zong-Hui Jiang,Shi-Ping Yan,Geng-Lin Wang,Xin-Kan Yao,Hong-Gen Wang POLYHEDRON,1999,18,781	bis(Hexafluoroacetylacetonato)-(2-(3-nitrophenyl)-4,4,5,5-tetramethylimidazoline-1-oxyl-3-oxide)-copper(ii). bis(Hexafluoroacetylacetonato)-(2-(3-nitrophenyl)nitronylnitroxide)-copper(ii).	1:1	2	1	κ1	M1	1	none	acetylacetonato	terminal	co-ligand	A*M1	A*B01)2	A*B01)2*M1	0D	0D	1	1	1M2-1	1,3M4-1
WITFIO	A.B.Burdukov,D.A.Guschin,N.V.Pervukhina,V.N.Ikorskii,Yu.G.Shvedenkov,V.A.Reznikov,V.I.Ovcharenko CRYSTAL ENGINEERING,1999,2,265	catena-((\m~3~-2,2,5,5-Tetramethyl-4-(1-cyano-3-methylbutylidene-2-one)-imidazolidine-1-oxide)-(hexafluoroacetylacetonato-O,O')-copper).	1:1	1	1	κ1	M1	1	none	acetylacetonato, cyano	increases connectivity	heterocyclic N-oxide and co-ligand	A*M1	A*T11*B01	A*K21*B01	0D	3D	1	none	1M2-1	srs; 3/10/c1
WITFOU	A.B.Burdukov,D.A.Guschin,N.V.Pervukhina,V.N.Ikorskii,Yu.G.Shvedenkov,V.A.Reznikov,V.I.Ovcharenko CRYSTAL ENGINEERING,1999,2,265	catena-((\m~3~-2,2,5,5-Tetramethyl-4-(1-cyanopentylidene-2-one)-imidazolidine-1-oxide)-(\m~2~-2,2,5,5-tetramethyl-4-(1-cyanopentylidene-2-one)imidazolidine-1-oxide)-bis(hexafluoroacetylacetonato-O,O')-di-copper).	2:1	1	1	κ1	M1, 0D	1	none	1-cyanopentylidene-2-one, acetylacetonato	increases connectivity	heterocyclic N-oxide and co-ligand	A)2*M1	A*T11*B01	A)2*K21*T11*B01)2	0D	2D	1	none	1M2-1	fes
WITYED	G.V.Romanenko,V.I.Ovcharenko Zh.Strukt.Khim.(Russ.)(J.Struct.Chem.),2000,41,349	catena-(bis(\m~2~-3-(2,2,5,5-Tetramethyl-1-oxy-imidazolin-3-yl)-3-chloro-1,1,1-trifluoroprop-2-en-2-olato-N,O,O')-copper(ii)).	1:2	1	1	κ1	M1	2	none	imidazolin-prop-2-en-2-olato	increases connectivity	heterocyclic N-oxide	A*M1)2	A*B01)2	A*T11)2	0D	2D	1	none	1,2M3-1	sql
WITYIH	G.V.Romanenko,V.I.Ovcharenko Zh.Strukt.Khim.(Russ.)(J.Struct.Chem.),2000,41,349	catena-(bis(\m~2~-Ethyl3-(2,2,5,5-tetramethyl-1-oxy-imidazolin-3-yl)-3-bromo-2-oxyprop-2-enoate-N,O,O')-copper(ii)). catena-(bis(mu!2$-2,2,5,5-Tetramethyl-4-(1'-bromo-3'-ethoxy-3'-oxo-2'-olato-1'-propenyl)-3-imidazoline-1-oxyl-N,O,O')-copper(ii)).	1:2	1	1	κ1	M1	2	none	imidazolin-prop-2-en-2-olato	increases connectivity	heterocyclic N-oxide	A*M1)2	A*B01)2	A*T11)2	0D	2D	1	none	1,2M3-1	sql
WONWOL	H.Oshio,T.Yaginuma,T.Ito BULL.CHEM.SOC.JPN.,2000,73,1365	bis((Oxalato-O,O')-(2-(2-N-methylpyridinium)-4,4,5,5-tetramethyl-4,5-dihydro-1H-imidazo-1-oxyl 3-oxide-O))-copper(ii) methanol solvate.	1:2	2	1	κ1	M1	2	none	oxalato	terminal	co-ligand	A*M1)2	A*B01)2	A*B01)2*M1)2	0D	0D	1	1	1,2M3-1	1,4M5-1
WONWUR	H.Oshio,T.Yaginuma,T.Ito BULL.CHEM.SOC.JPN.,2000,73,1365	bis((Oxalato-O,O')-(2-(4-N-methylpyridinium)-4,4,5,5-tetramethyl-4,5-dihydro-1H-imidazo-1-oxyl 3-oxide-O))-copper(ii) dihydrate.	1:2	2	1	κ1	M1	2	none	oxalato	terminal	co-ligand	A*M1)2	A*B01)2	A*B01)2*M1)2	0D	0D	1	1	1,2M3-1	1,4M5-1
XALXEO	B.Twamley ACTA CRYSTALLOGR.,SECT.E:STRUCT.REP.ONLINE,2005,61,m619	bis(\m~2~-4-Nitropyridine N-oxide-O,O)-bis(dibromo-copper(ii)).	1:1	1	1	κ2	M2	2	2-c N2O2Cu2	bromo	terminal	co-ligand	A*M2	A*M1)2	A*M2*M1)2	0D	0D	2	2	2M4-1	1,2,4M8-3
XEGJAX	M.Haraguchi,E.Tretyakov,N.Gritsan,G.Romanenko,D.Gorbunov,A.Bogomyakov,K.Maryunina,Shuichi Suzuki,K.Masatoshi,D.Shiomi,K.Sato,T.Takeji,S.Nishihara,K.Inoue,K.Okada CSD Communication(Private Communication),2017,	(\m-2,2'-(azulene-1,3-diyl)bis(4,4,5,5-tetramethyl-4,5-dihydro-1H-imidazole-1-oxyl 3-oxide))-tetrakis(hexafluoroacetylacetonato)-di-copper(ii).	2:1	4	2	κ1	B2	1	none	acetylacetonato	increases connectivity	co-ligand	A)2*B2	A*B01)2	A)2*B2*B01)4	0D	0D	1	2	1,2M3-1	1,2,3M7-2
XICBOA	Deqing Zhang,Wei Liu,Wei Xu,Xiang lin Jin,Daoben Zhu INORG.CHIM.ACTA,2001,318,84	(\m~2~-1,4-bis(nitronylnitroxide)benzene)-tetrakis(hexafluoroacetylacetonato)-di-copper(ii).	2:1	4	2	κ1	B2	1	none	acetylacetonato	increases connectivity	co-ligand	A)2*B2	A*B01)2	A)2*B2*B01)4	0D	0D	1	2	1,2M3-1	1,2,3M7-2
XITNAP	Licun Li,Daizheng Liao,Zonghui Jiang,Shiping Yan J.CHEM.SOC.,DALTON TRANS.,2002,1350	catena-(bis(\m~2~-2-(Pyrid-3-yl)-4,4,5,5-tetramethylimidazoline-1-oxyl-3-oxide-N,O)-bis(azido-N)-copper(ii)).	1:2	2	1	κ1	M1	2	none	pyridyl, azido	increases connectivity	heterocyclic N-oxide and co-ligand	A*M1)2	A*M1)4	A*B2)2*M1)2	0D	2D	1	none	1,2M3-1	sql
XOCBEW	A.B.Burdukov,N.V.Pervukhina,V.I.Ovcharenko Zh.Strukt.Khim.(Russ.)(J.Struct.Chem.),2001,42,983	catena-(bis((\m~2~-2,2,5,5-Tetramethyl-4-phenyl-3-imidazoline-1-oxyl-3-oxide)-bis(hexafluoroacetylacetonato)-copper(ii))).	1:1	2	2	κ1	B2	2	none	acetylacetonato	terminal	co-ligand	A*B2	A*B01)2	A*B2*B01)2	1D	1D	none	none	2C1	2C1
XOHQOB	Junhua Jia,A.J.Blake,N.R.Champness,P.Hubberstey,C.Wilson,M.Schroder INORG.CHEM.,2008,47,8652	catena-((\m~2~-4,4'-Bipyridine-N,N'-dioxido-O,O')-bis(4,4'-bipyridine-N,N'-dioxido-O)-bis(methanol)-copper(ii) bis(hexafluorophosphate) methanol solvate).	1:3	2	2, 1	κ1	B2, M1	4	none	methanol	terminal	co-ligand	A*B2*M1)2	A*M1)2	A*B2*M1)4	1D	1D	none	none	1,2,4-c net new3 (2C1)	2C1
XOHRAO	Junhua Jia,A.J.Blake,N.R.Champness,P.Hubberstey,C.Wilson,M.Schroder INORG.CHEM.,2008,47,8652	catena-(tris(\m~2~-4,4'-Bipyridine-N,N'-dioxido-O,O')-copper(ii)bis(tetrafluoroborate)).	1:3	2	2	κ1	B2	6	none	none	none	none	A*B2)3	none	A*B2)3	2D	2D	none	none	2,6-c net new5 (hxl)	hxl
XOHROC	Junhua Jia,A.J.Blake,N.R.Champness,P.Hubberstey,C.Wilson,M.Schroder INORG.CHEM.,2008,47,8652	catena-(bis(\m~2~-4,4'-Bipyridine-N,N'-dioxido-O,O')-bis(4,4'-bipyridine-N,N'-dioxido-O)-copper(ii) bis(hexafluorophosphate)).	1:4	2	2, 1	κ1	B2, M1	6	none	none	none	none	A*B2)2*M1)2	none	A*B2)2*M1)2	2D	2D	none	none	1,2,6-c net new6 (sql)	sql
XOHSET	Junhua Jia,A.J.Blake,N.R.Champness,P.Hubberstey,C.Wilson,M.Schroder INORG.CHEM.,2008,47,8652	hexakis(4,4'-Bipyridine-N,N'-dioxido-O)-copper(ii) bis(tetrafluoroborate).	1:6	2	1	κ1	M1	6	none	none	none	none	A*M1)6	none	A*M1)6	0D	0D	1	1	1,6M7-1	1,6M7-1
XOHSOD	Junhua Jia,A.J.Blake,N.R.Champness,P.Hubberstey,C.Wilson,M.Schroder INORG.CHEM.,2008,47,8652	bis(\m~2~-syn-4,4'-Bipyridine-N,N'-dioxido-O,O')-tetra-aqua-bis(4,4'-bipyridine-N,N'-dioxido-O)-di-copper(ii) bis(hexafluorosilicate) methanol solvatedihydrate.	1:2	2	2, 1	κ1	B2, M1	3	none	water	terminal	co-ligand	A*B2*M1	A*M1)2	A*B2*M1)3	0D	0D	2	2	1,2,3M6-1	1,2,5M10-1
YALCIX	G.V.Romanenko,N.V.Podberezskaya Zh.Strukt.Khim.(Russ.)(J.Struct.Chem.),1992,33,93-1	catena(bis(\m~2~-4-(2-Ethoxycarbonyl-2-oxyvinylene)-2,2,5,5-tetramethyl-3-imidazolidine-N-oxide-N,O))-copper(ii).	1:2	1	1	κ1	M1	2	none	imidazolin-prop-2-en-2-olato	increases connectivity	heterocyclic N-oxide	A*M1)2	A*B01)2	A*T11)2	0D	2D	1	none	1,2M3-1	sql
YISLAQ	Ghosh D.,Ferfolja K.,Drabavicius Z.,Steed J.W.,Damodaran K.K. New J.Chem.,2018,42,19963	catena-(tetrakis(\m-isonicotinate-N-oxide)-bis(nitrato)-tri-copper(ii)).	3:4	1	1	κ2, κ1	M2, M1	4	4-c N4O4Cu3	carboxylate, nitrato	increases connectivity	heterocyclic N-oxide and co-ligand	A)3*M2)2*M1)2	A)3*B2)4*M1)2	A)3*T4)2*T3)2*M1)2	0D	3D	3	none	1,1,2,4M7-1	3,4,4,6T166
YIYQON	R.Sarma,A.Karmakar,J.B.Baruah INORG.CHIM.ACTA,2008,361,2081	bis(4-nitrobenzoato)-bis(pyridine N-oxide)-copper(ii).	1:2	1	1	κ1	M1	2	none	carboxylate	terminal	co-ligand	A*M1)2	A*B01)2	A*B01)2*M1)2	0D	0D	1	1	1,2M3-1	1,4M5-1
YIYQUT	R.Sarma,A.Karmakar,J.B.Baruah INORG.CHIM.ACTA,2008,361,2081	tetrakis(\m~2~-benzoato)-bis(pyridine N-oxide)-di-copper(ii)tetrakis(\m~2~-benzoato)-dimethanol-di-copper(ii).	2:1	1	1	κ1	M1	1	none	carboxylate	increases connectivity	co-ligand	A)2*M1	A)2*B2)4*M1	A*B2)2*M1	0D	0D	1	2	1M2-1	1,2,5M8-2
YOMVED	Z.Hnatejko,D.Kwiatek,G.Durkiewicz,M.Kubicki,R.Jastrazab,S.Lis POLYHEDRON,2014,81,728	Di-isothiocyanato-bis(pyridine-N-oxide-O)-copper(ii).	1:2	1	1	κ1	M1	2	none	isothiocyanato	terminal	co-ligand	A*M1)2	A*M1)2	A*M1)4	0D	0D	1	1	1,2M3-1	1,4M5-1
YOVDAO	A.B.Burdukov,V.I.Ovcharenko,N.V.Pervukhina,V.N.Ikorskii,I.A.Kiriluk,I.A.Grigoriev POLYHEDRON,1995,14,501	catena(bis(\m~3~-4-Amido-2,2-dimethyl-5,5-dimethoxy-3-imidazoline-1-oxyl)-octakis(hexafluoroacetylacetonato)-tetra-copper).	2:1	1	1	κ1	M1	2	none	3-imidazoline-1-oxyl, acetylacetonato	increases connectivity	heterocyclic N-oxide and co-ligand	A)2*M1	A)2*B11*B01)4	A)2*T21*B01)4	0D	1D	1	none	1,2M3-1	2C1
YOYPUX	Yang Rui-Na,Hou Yi-Min,Xue Bao-Yu,Jin Dou-Man,Chen Liao-Rong,Luo Bao-Sheng Jiegou Huaxue(Chin.)(Chin.J.Struct.Chem.),1995,14,122	tetrakis(\m~2~-Benzoato-O,O')-bis(pyridine N-oxide)-di-copper(ii).	1:1	1	1	κ1	M1	1	none	carboxylate	increases connectivity	co-ligand	A*M1	A*B2)2	A*B2)2*M1	0D	0D	1	2	1M2-1	1,2,5M8-2
YOYPUX04	R.E.Marsh ACTA CRYSTALLOGR.,SECT.B:STRUCT.SCI.,1999,55,931	tetrakis(\m~2~-Benzoato-O,O')-bis(pyridine N-oxide)-di-copper(ii).	1:1	1	1	κ1	M1	1	none	carboxylate	increases connectivity	co-ligand	A*M1	A*B2)2	A*B2)2*M1	0D	0D	1	2	1M2-1	1,2,5M8-2
YUNWIN	Zong-Hui Jiang,Qi Yi,Dai-Zheng Liao,Zhen-Wei Huan,Shi-Ping Yan,Geng-Lin Wang,Xin-Kan Yao,Ru-Ji Wang TRANSITION MET.CHEM.,1995,20,136	tris(bis(Hexafluoroacetylacetonato)-copper(ii))bis(2-(4'-methoxyphenyl)-2-R-4,4,5,5-tetramethylimidazoline-1-oxyl-3-oxide).	3:2	2	2	κ1	B2	2, 1	none	acetylacetonato	terminal	co-ligand	A)3*B2)2	A*B01)2	A)3*B2)2*B01)6	0D	0D	3	3	1,2,2M5-1	1,1,2,3,4M11-1
ZAGPEC	M.A.S.Goher,F.A.Mautner POLYHEDRON,1995,14,1751	catena(bis(\m~2~-Azido)-(pyridine-N-oxide)-copper(ii)).	1:1	1	1	κ1	M1	1	none	Azido	increases connectivity	co-ligand	A*M1	A*M2)2	A*M2)2*M1	0D	1D	1	none	1M2-1	2,4C4
ZIHZOF	F.Lanfranc de Panthou,E.Belorizky,R.Calemczuk,D.Luneau,C.Marcenat,E.Ressouche,P.Turek,P.Rey J.AM.CHEM.SOC.,1995,117,11247	bis((\m~3~-2-(3-Pyridyl)-4,4,5,5-tetramethyl-4,5-dihydro-1H-imidazolyl-1-oxy-3-oxide)-bis(bis(hexafluoroacetylacetonato)-copper(ii))).	2:1	2	2	κ1	B2	1	none	pyridin, acetylacetonato	increases connectivity	heterocyclic N-oxide and co-ligand	A)2*B2	A)2*B01)4*M1	A)2*T3*B01)4	0D	0D	1	4	1,2M3-1	1,1,3,3,4M14-1
ZIHZOF01	F.Lanfranc de Panthou,E.Belorizky,R.Calemczuk,D.Luneau,C.Marcenat,E.Ressouche,P.Turek,P.Rey J.AM.CHEM.SOC.,1995,117,11247	bis((\m~3~-2-(3-Pyridyl)-4,4,5,5-tetramethyl-4,5-dihydro-1H-imidazolyl-1-oxy-3-oxide)-bis(bis(hexafluoroacetylacetonato)-copper(ii))).	2:1	2	2	κ1	B2	1	none	pyridin, acetylacetonato	increases connectivity	heterocyclic N-oxide and co-ligand	A)2*B2	A)2*B01)4*M1	A)2*T3*B01)4	0D	0D	1	4	1,2M3-1	1,1,3,3,4M14-1
ZIYSEI	Huaifang Fang,Gang Li,Danyong Jiang,Guoli Zheng POLYHEDRON,2019,160,53	catena-[hexakis(\m-4,4'-bipyridine-N, N'-dioxide)-dodeca-aqua-tetra-copper(ii)49,50,51,52,53,54,55,56-octahydroxynonacyclo[43.3.1.1^3,7^.1^9,13^.1^15,19^.1^21,25^.1^27,31^.1^33,37^.1^39,43^]hexapentaconta-1(49),3(56),4,6,9(55),10,12,15(54),16,18,21(53),22,24,27(52),28,30,33(51),34,36,39(50),40,42,45,47-tetracosaene-5,11,17,23,29,35,41,47-octasulfonate hydrate].	2:3	2	2, 1	κ1	B2	4, 3, 2	none	water	terminal	co-ligand	A)2*B2)3	A*M1)3	A)2*B2)3*M1)6	3D	3D	none	none	2,2,2,2,3,4-c net new7 (tfc)	tfc
ZOBTEP01	Zong-Hui Jiang,Bai-Wang Sun,Dai-Zheng Liao,Geng-Lin Wang,F.Dahan,J.-P.Tuchagues INORG.CHIM.ACTA,1998,279,69	Dichloro-bis(2-(4-methoxyphenyl)-4,4,5,5-tetramethylimidazolin-1-oxyl-3-oxide)-copper(ii).	1:2	2	1	κ1	M1	2	none	chloro	terminal	co-ligand	A*M1)2	A*M1)2	A*M1)4	0D	0D	1	1	1,2M3-1	1,4M5-1
ZURMUW	E.V.Tretyakov,G.V.Romanenko,S.L.Veber,M.V.Fedin,A.V.Polushkin,A.O.Tkacheva,V.I.Ovcharenko AUST.J.CHEM.,2015,68,970	bis(\m-2-(1-ethyl-1H-pyrazol-4-yl)-4,4,5,5-tetramethyl-4,5-dihydro-3H-pyrrol-3-one 1-oxide)-hexakis(1,1,1,5,5,5-hexafluoroacetylacetonato)-tri-copper.	3:2	1	1	κ1	M1	2	none	pyrazol, acetylacetonato	increases connectivity	heterocyclic N-oxide and co-ligand	A)3*M1)2	A)3*B01)6*M1)2	A)3*B2)2*B01)6	0D	0D	1	3	1,2M3-1	1,1,2,3,4M11-1
ZURNAD	E.V.Tretyakov,G.V.Romanenko,S.L.Veber,M.V.Fedin,A.V.Polushkin,A.O.Tkacheva,V.I.Ovcharenko AUST.J.CHEM.,2015,68,970	bis(\m-2-(1-butyl-1H-pyrazol-4-yl)-4,4,5,5-tetramethyl-4,5-dihydro-3H-pyrrol-3-one 1-oxide)-hexakis(1,1,1,5,5,5-hexafluoroacetylacetonato)-tri-copper.	3:2	1	1	κ1	M1	2	none	pyrazol, acetylacetonato	increases connectivity	heterocyclic N-oxide and co-ligand	A)3*M1)2	A)3*B01)6*M1)2	A)3*B2)2*B01)6	0D	0D	1	3	1,2M3-1	1,1,2,3,4M11-1
ZURNIL	E.V.Tretyakov,G.V.Romanenko,S.L.Veber,M.V.Fedin,A.V.Polushkin,A.O.Tkacheva,V.I.Ovcharenko AUST.J.CHEM.,2015,68,970	catena-[bis(\m-4,4,5,5-tetramethyl-2-(1-methyl-1H-pyrazol-4-yl)-4,5-dihydro-3H-pyrrol-3-one1-oxide)-tetrakis(1,1,1,5,5,5-hexafluoroacetylacetonato)-di-copper].	1:1	1	1	κ1	M1	1	none	acetylacetonato, pyrazol	increases connectivity	heterocyclic N-oxide and co-ligand	A*M1	A*B01)2*M1	A*B2*B01)2	0D	1D	1	none	1M2-1	2C1
ZURNIL01	E.V.Tretyakov,G.V.Romanenko,S.L.Veber,M.V.Fedin,A.V.Polushkin,A.O.Tkacheva,V.I.Ovcharenko AUST.J.CHEM.,2015,68,970	catena-[bis(\m-4,4,5,5-tetramethyl-2-(1-methyl-1H-pyrazol-4-yl)-4,5-dihydro-3H-pyrrol-3-one1-oxide)-tetrakis(1,1,1,5,5,5-hexafluoroacetylacetonato)-di-copper].	1:1	1	1	κ1	M1	1	none	acetylacetonato, pyrazol	increases connectivity	heterocyclic N-oxide and co-ligand	A*M1	A*B01)2*M1	A*B2*B01)2	0D	1D	1	none	1M2-1	2C1
ZURNIL02	E.V.Tretyakov,G.V.Romanenko,S.L.Veber,M.V.Fedin,A.V.Polushkin,A.O.Tkacheva,V.I.Ovcharenko AUST.J.CHEM.,2015,68,970	catena-[bis(\m-4,4,5,5-tetramethyl-2-(1-methyl-1H-pyrazol-4-yl)-4,5-dihydro-3H-pyrrol-3-one1-oxide)-tetrakis(1,1,1,5,5,5-hexafluoroacetylacetonato)-di-copper].	1:1	1	1	κ1	M1	1	none	acetylacetonato, pyrazol	increases connectivity	heterocyclic N-oxide and co-ligand	A*M1	A*B01)2*M1	A*B2*B01)2	0D	1D	1	none	1M2-1	2C1
ZURNIL03	E.V.Tretyakov,G.V.Romanenko,S.L.Veber,M.V.Fedin,A.V.Polushkin,A.O.Tkacheva,V.I.Ovcharenko AUST.J.CHEM.,2015,68,970	catena-[(\m-4,4,5,5-tetramethyl-2-(1-methyl-1H-pyrazol-4-yl)-4,5-dihydro-3H-pyrrol-3-one 1-oxide)-bis(1,1,1,5,5,5-hexafluoroacetylacetonato)-copper].	1:1	1	1	κ1	M1	1	none	acetylacetonato, pyrazol	increases connectivity	heterocyclic N-oxide and co-ligand	A*M1	A*B01)2*M1	A*B2*B01)2	0D	1D	1	none	1M2-1	2C1
ZURNIL04	E.V.Tretyakov,G.V.Romanenko,S.L.Veber,M.V.Fedin,A.V.Polushkin,A.O.Tkacheva,V.I.Ovcharenko AUST.J.CHEM.,2015,68,970	catena-[bis(\m-4,4,5,5-tetramethyl-2-(1-methyl-1H-pyrazol-4-yl)-4,5-dihydro-3H-pyrrol-3-one.	1:1	1	1	κ1	M1	1	none	pyrazol	increases connectivity	heterocyclic N-oxide and co-ligand	A*M1	A*B01)2*M1	A*B2*B01)2	0D	1D	1	none	1M2-1	2C1
ZURPIN	E.V.Tretyakov,G.V.Romanenko,S.L.Veber,M.V.Fedin,A.V.Polushkin,A.O.Tkacheva,V.I.Ovcharenko AUST.J.CHEM.,2015,68,970	catena-[(\m-4,4,5,5-tetramethyl-2-(1-propyl-1H-pyrazol-4-yl)-4,5-dihydro-3H-pyrrol-3-one 1-oxide)-bis(1,1,1,5,5,5-hexafluoroacetylacetonato)-copper].	1:1	1	1	κ1	M1	1	none	acetylacetonato, pyrazol	increases connectivity	heterocyclic N-oxide and co-ligand	A*M1	A*B01)2*M1	A*B2*B01)2	0D	1D	1	none	1M2-1	2C1
ZURPIN01	E.V.Tretyakov,G.V.Romanenko,S.L.Veber,M.V.Fedin,A.V.Polushkin,A.O.Tkacheva,V.I.Ovcharenko AUST.J.CHEM.,2015,68,970	catena-[(\m-4,4,5,5-tetramethyl-2-(1-propyl-1H-pyrazol-4-yl)-4,5-dihydro-3H-pyrrol-3-one 1-oxide)-bis(1,1,1,5,5,5-hexafluoroacetylacetonato)-copper].	1:1	1	1	κ1	M1	1	none	acetylacetonato, pyrazol	increases connectivity	heterocyclic N-oxide and co-ligand	A*M1	A*B01)2*M1	A*B2*B01)2	0D	1D	1	none	1M2-1	2C1
ZURQAG	E.V.Tretyakov,G.V.Romanenko,S.L.Veber,M.V.Fedin,A.V.Polushkin,A.O.Tkacheva,V.I.Ovcharenko AUST.J.CHEM.,2015,68,970	catena-[(\m-2-(1-butyl-1H-pyrazol-4-yl)-4,4,5,5-tetramethyl-4,5-dihydro-3H-pyrrol-3-one 1-oxide)-bis(1,1,1,5,5,5-hexafluoroacetylacetonato)-copper].	1:1	1	1	κ1	M1	1	none	acetylacetonato, pyrazol	increases connectivity	heterocyclic N-oxide and co-ligand	A*M1	A*B01)2*M1	A*B2*B01)2	0D	1D	1	none	1M2-1	2C1
ZURQIO	E.V.Tretyakov,G.V.Romanenko,S.L.Veber,M.V.Fedin,A.V.Polushkin,A.O.Tkacheva,V.I.Ovcharenko AUST.J.CHEM.,2015,68,970	catena-(bis(\m~2~-2-(1-Methylpyrazol-4-yl)-4,4,5,5-tetramethylimidazoline-3-oxide-1-oxyl-N',O)-tetrakis(hexafluoroacetylacetonato-O,O')-di-copper(ii)).	1:1	2	1	κ1	M1	1	none	acetylacetonato, pyrazol	increases connectivity	heterocyclic N-oxide and co-ligand	A*M1	A*B01)2*M1	A*B2*B01)2	0D	1D	1	none	1M2-1	2C1
